# Supplementary material for: Visible-light-induced tandem phosphorylation cyclization of vinyl azides under mild conditions
Source: Royal Society of Chemistry journal article supplement (doi:10.1039/c7qo01004d), 2017-11-29

## Supporting Information

# Visible-Light-Induced Tandem Phosphorylation Cyclization of Vinyl Azides under Mild Conditions

Yong-Hong Li,<sup>†</sup> Yuan-Yuan Zhu<sup>†</sup> and Shang-Dong Yang<sup>\*†‡</sup>

<sup>†</sup>State Key Laboratory of Applied Organic Chemistry, Lanzhou University, Lanzhou 730000, P. R. China.

<sup>‡</sup>State Key Laboratory for Oxo Synthesis and Selective Oxidation, Lanzhou Institute of Chemical Physics, Chinese Academy of Sciences, Lanzhou, 730000, P. R. China.

## Table of contents

|                                                                     |    |
|---------------------------------------------------------------------|----|
| 1. General information.....                                         | 2  |
| 2. The safety issues for handling of azidocompounds.....            | 2  |
| 2.1. Sodium azide (NaN <sub>3</sub> ).....                          | 2  |
| 2.2. Organic azides.....                                            | 2  |
| 3. Synthesis of biaryl vinyl azides.....                            | 2  |
| 3.1. Synthesis of biarylalkenes.....                                | 2  |
| 3.2. Synthesis of biaryl vinyl azides (Hassner's method).....       | 3  |
| 3.3. Characterization data of new biarylvinylazides.....            | 3  |
| 4. General procedure.....                                           | 5  |
| 4.1. Optimization of Reaction Conditions.....                       | 5  |
| 4.2. General procedure for Phosphoryl radical onto vinyl azides.... | 7  |
| 4.3. Characterization data of new phenanthridine.....               | 8  |
| 5. References.....                                                  | 17 |
| 6. Spectra.....                                                     | 17 |

## 1. General information

$^1\text{H}$  NMR (400 MHz) and  $^{13}\text{C}$  NMR (100 MHz) spectra were recorded on a Bruker advance III 400 spectrometer in  $\text{CDCl}_3$  with TMS as internal standard.  $^{31}\text{P}$  NMR (162 MHz) spectra and  $^{19}\text{F}$  NMR (376 MHz) were recorded on the same instrument. Mass spectra were measured using Thermo Scientific DSQ II. The starting materials were purchased from Aldrich, Acros Organics, J&K Chemicals or TCI and used without further purification. Solvents were dried and purified according to the procedure from "Purification of Laboratory Chemicals book". Column chromatography was carried out on silica gel (particle size 200-400 mesh ASTM).

## 2. The safety issues for handling of azido compounds<sup>[1,2]</sup>

### 2.1. Sodium azide ( $\text{NaN}_3$ )

Sodium azide is toxic ( $\text{LD}_{50}$  oral = 27 mg/kg for rats) and can be absorbed through skin. Appropriate gloves are necessary when using it. It decomposes explosively upon heating to above  $275^\circ\text{C}$ . Sodium azide is relatively safe especially in aqueous solution, *unless acidified to form  $\text{HN}_3$* , which is volatile and highly toxic.

### 2.2. Organic azides

Organic azides are potentially explosive substances that can decompose with the slight input of energy from external sources (heat, light, pressure, etc). When designing the organic azides used for the project, we keep in mind the following equation. It is noted that this equation takes into account all nitrogen atoms in the organic azide, not just those in the azido group. All organic azides prepared in this work are satisfied with the equation above and they are enough stable to be stored under  $-20^\circ\text{C}$  at least for 6 months. We have never experienced a safety problem with these materials.

$(\text{N}_\text{C} + \text{N}_\text{O}) / \text{N}_\text{N} > 3$  ( $\text{N}_\text{C}$ : number of the carbon atom,  $\text{N}_\text{O}$ : number of the oxygen atom,  $\text{N}_\text{N}$ : number of the nitrogen atom)

## 3. Synthesis of biaryl vinyl azides

### 3.1. Synthesis of biaryl alkenes

Biaryl alkenes were prepared by a two-step sequences including Suzuki-Miyaura coupling and Wittig reaction. The preparation of biaryl alkenes was described in previous reports, and the NMR spectroscopy was consisted with those data.<sup>[1]</sup>

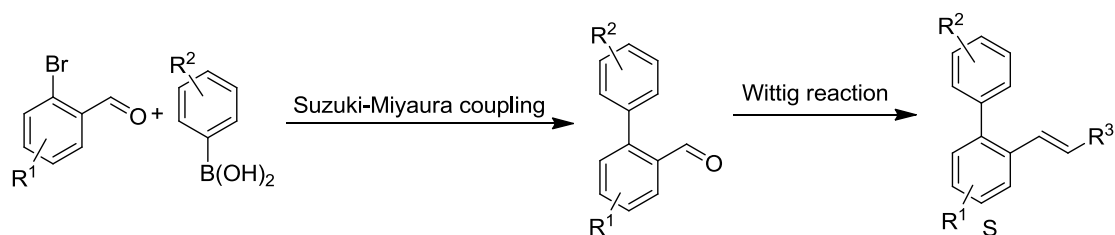

A general procedure for synthesis of biaryl alkene **S1** ( $\text{R}_1 = \text{H}$ ,  $\text{R}_2 = \text{Me}$ ):

To a solution of 2-bromobenzaldehyde (9.41 g, 50.9 mmol) and p-tolylboronic acid (8.31 g, 61.1 mmol) in ethanol (60 mL) and 1,2-dimethoxyethane (DME) (80 mL) was added an aqueous solution of  $\text{Na}_2\text{CO}_3$  2M (100 mL, 200 mmol), followed by  $\text{Pd}(\text{PPh}_3)_4$  (4.62 g, 4.0 mmol). The reaction was stirred at  $90^\circ\text{C}$  under nitrogen atmosphere for 6 h. After completion, the reaction mixture was filtered through a short pad of celite and washed with  $\text{Et}_2\text{O}$ . The aqueous phase was extracted with  $\text{Et}_2\text{O}$  three times. The organic fractions were washed with brine, dried over  $\text{MgSO}_4$ , and concentrated under reduced pressure. The crude product was purified by column

chromatography (hexane : EtOAc = 95 : 5) to biphenyl-2-carbaldehyde.

To a suspension of MePPh<sub>3</sub>Br (27.29 g, 76.4 mmol) in THF (120 mL), *t*-BuOK (8.57 g, 76.4 mmol) was added portionwise. The reaction was allowed to stir at room temperature for 30 min. It was then cooled to -78 °C and a solution of the intermediate aldehyde (8.81 g, 48.3 mmol) in THF (50 mL) was added dropwise. The mixture was stirred at -78 °C for 1 h and then warmed to room temperature for 1 h. The reaction was quenched with water. The aqueous phase was extracted with Et<sub>2</sub>O three times. The organic fractions were washed with brine, dried over MgSO<sub>4</sub> and concentrated under reduced pressure. The crude product was purified by column chromatography (hexane : EtOAc = 97 : 3) to afford 2-vinylbiphenyl from 2-bromobenzaldehyde **S1**.

All biaryl alkenes **S** were prepared through the same synthetic route as that of **S1**.

### 3.2. Synthesis of biaryl vinyl azides (Hassner's method)

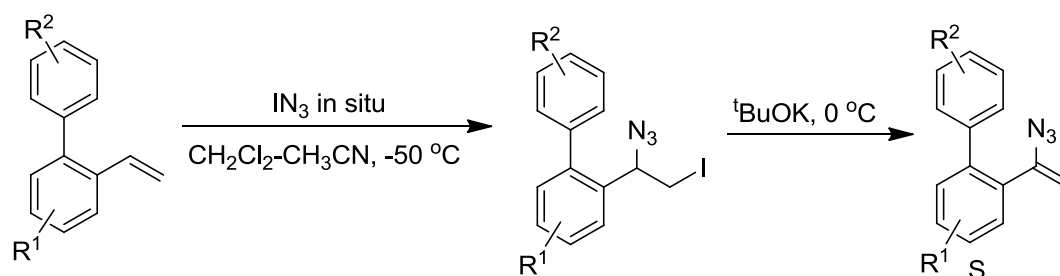

A general procedure of method A ( $R_1 = \text{H}$ ,  $R_2 = \text{Me}$ ): this procedure was slightly modified from Hassner's method.<sup>[3]</sup>

To a suspension of NaN<sub>3</sub> (2.119 g, 32.4 mmol) in acetonitrile (8.0 mL) was added dropwise a solution of iodine monochloride (3.175 g, 19.6 mmol) in CH<sub>2</sub>Cl<sub>2</sub> (30 mL) at 0 °C. The mixture was stirred at the same temperature for 30 min and then cooled to -50 °C. A solution of 4'-methyl-2-vinylbiphenyl (2.520 g, 13.0 mmol) in CH<sub>2</sub>Cl<sub>2</sub> (15 mL) was added slowly over 30 min. After that, the mixture was further kept at the same temperature for 15 min, and then was quenched with saturated aqueous Na<sub>2</sub>S<sub>2</sub>O<sub>3</sub>. The aqueous layer was extracted two times with EtOAc. The combined extracts were washed with brine and dried over MgSO<sub>4</sub>. After evaporation of solvents, the resulting crude materials were used immediately for the next step without any further purification. This step only led to a single regioisomer.

To a solution of the obtained compounds above in Et<sub>2</sub>O (30 mL) was added *t*-BuOK (1.602 g, 14.3 mmol) at 0 °C, and the mixture was stirred for 2 h at the same temperature. The reaction was quenched with water, and the organic materials were extracted with Et<sub>2</sub>O. The Et<sub>2</sub>O solution was washed with brine, and dried over MgSO<sub>4</sub>. The solvent was removed in vacuo, and the resulting crude materials were purified by flash column chromatography silica gel (hexane : EtOAc = 99 : 1) to give vinyl azide 2-vinyl-1,1'-biphenyl **S2** as a pale yellow liquid.

All biarylvinyl azides were prepared through the same synthetic route as that of **S2**.

### 3.3. Characterization data of new biarylvinylazides

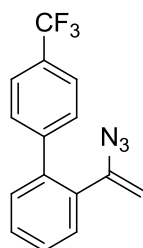

**2-(1-azidovinyl)-4'-(trifluoromethyl)biphenyl(1e):** yellow liquid,  $^1\text{H}$  NMR (300 MHz,  $\text{CDCl}_3$ )  $\delta$  7.66 (2H, d,  $J = 9.0$  Hz), 7.32-7.47 (4H, m), 7.56 (2H, d,  $J = 9.0$  Hz), 4.94 (1H, s), 4.81 (1H, s);  $^{19}\text{F}$  NMR (376 MHz,  $\text{CDCl}_3$ )  $\delta$  63.38;  $^{13}\text{C}$  NMR (75 MHz,  $\text{CDCl}_3$ )  $\delta$  145.22, 144.23, 138.98, 133.82, 130.30, 130.10, 129.69, 129.53, 129.25, 129.06, 128.17, 125.11, 125.16, 103.96.

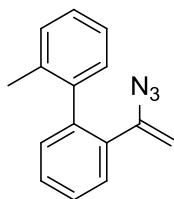

**2-(1-azidovinyl)-2'-methylobiphenyl(1f):** yellow liquid,  $^1\text{H}$  NMR (300 MHz,  $\text{CDCl}_3$ )  $\delta$  7.44-7.47 (1H, m), 7.31-7.39 (2H, m), 7.15-7.25 (5H, m), 4.81 (1H, d,  $J = 3.0$  Hz), 4.63 (1H, d,  $J = 3.0$  Hz), 2.11 (3H, s);  $^{13}\text{C}$  NMR (75 MHz,  $\text{CDCl}_3$ )  $\delta$  144.80, 140.46, 140.41, 135.52, 134.24, 130.58, 129.89, 129.43, 128.82, 128.70, 127.42, 127.22, 125.38, 103.24, 20.05.

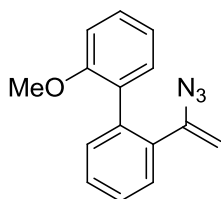

**2-(1-azidovinyl)-2'-methoxybiphenyl(1g):** yellow liquid,  $^1\text{H}$  NMR (300 MHz,  $\text{CDCl}_3$ )  $\delta$  7.28-7.42 (5H, m), 7.22 (1H, d,  $J = 9.0$  Hz), 6.98 (1H, d,  $J = 9.0$  Hz), 6.90 (1H, d,  $J = 9.0$  Hz), 4.73 (1H, s), 4.42 (1H, s), 3.72 (3H, s);  $^{13}\text{C}$  NMR (75 MHz,  $\text{CDCl}_3$ )  $\delta$  156.08, 144.63, 137.47, 134.76, 131.05, 130.69, 129.73, 128.84, 128.77, 128.19, 127.23, 120.45, 110.54, 102.78, 55.01.

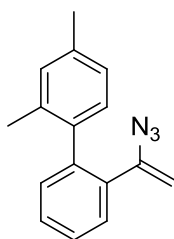

**2'-(1-azidovinyl)-2,4-dimethylbiphenyl(1k):** yellow liquid,  $^1\text{H}$  NMR (300 MHz,  $\text{CDCl}_3$ )  $\delta$  7.43-7.46 (1H, m), 7.30-7.37 (2H, m), 7.17-7.20 (1H, m), 7.10 (1H, d,  $J = 9.0$  Hz), 7.05 (1H, d,  $J = 9.0$  Hz), 7.00 (1H, s), 4.80 (1H, s), 4.62 (1H, s), 2.31 (3H, s), 2.06 (3H, s);  $^{13}\text{C}$  NMR (75 MHz,  $\text{CDCl}_3$ )  $\delta$  144.76, 140.59, 140.33, 134.68, 134.16, 132.33, 130.60, 130.07, 129.76, 128.72, 128.65, 128.12, 127.11, 103.20, 20.87, 19.51.

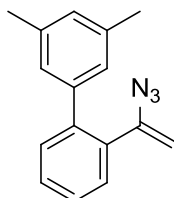

**2'-(1-azidovinyl)-3,5-dimethylbiphenyl(1l):** yellow liquid,  $^1\text{H}$  NMR (300 MHz,  $\text{CDCl}_3$ )  $\delta$  7.29-7.40 (4H, m), 7.06 (2H, s), 6.97 (1H, s), 4.90 (1H, s), 4.77 (1H, s), 2.33 (6H, s);  $^{13}\text{C}$  NMR (75 MHz,  $\text{CDCl}_3$ )  $\delta$  145.78, 140.70, 140.47, 137.47, 133.61, 130.37, 129.82, 129.18, 128.94, 127.11, 126.54, 103.45, 21.28.

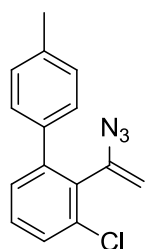

**2-(1-azidovinyl)-3-chloro-4'-methylbiphenyl(1n):** yellow liquid,  $^1\text{H}$  NMR (300 MHz,  $\text{CDCl}_3$ )  $\delta$  7.40 (1H, d,  $J = 3.0$  Hz), 7.29-7.36 (3H, m), 7.24 (1H, d,  $J = 9.0$  Hz), 7.18 (2H, d,  $J = 7.5$  Hz), 4.92 (1H, s), 4.79 (1H, s), 2.36 (3H, s);  $^{13}\text{C}$  NMR (75 MHz,  $\text{CDCl}_3$ )  $\delta$  144.60, 138.79, 137.41, 136.29, 135.02, 132.85, 131.65, 129.77, 129.25, 128.97, 128.39, 104.05, 21.14.

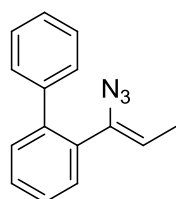

**2-(1-azidoprop-1-enyl)biphenyl(1o):** yellow liquid,  $^1\text{H}$  NMR (300 MHz,  $\text{CDCl}_3$ )  $\delta$  7.44-7.48 (2H, m), 7.32-7.39 (7H, m), 5.01 (1H, q,  $J = 12.0$  Hz), 1.65 (3H, d,  $J = 9.0$  Hz);  $^{13}\text{C}$  NMR (75 MHz,  $\text{CDCl}_3$ )  $\delta$  140.63, 140.28, 137.03, 133.92, 130.60, 130.36, 129.20, 128.82, 128.10, 127.53, 127.47, 115.89, 12.53.

## 4. General Procedures.

### 4.1. Optimization of Reaction Conditions

Reaction scheme: 2-(1-azidovinyl)-3-chloro-4'-methylbiphenyl (1n) +  $\text{HP(O)Ph}_2 \rightarrow$  phosphonium salt.

Chemical structures shown:

- Rhodamine B
- EOSIN Y
- Rose bengal
- $\text{Ru(bpy)}_3\text{Cl}_2 \cdot 6\text{H}_2\text{O}$

| entry          | $S_1/S_2$ (mol/mol) | cat                      | oxidant                                  | base | solvent                | result <sup>b</sup> |
|----------------|---------------------|--------------------------|------------------------------------------|------|------------------------|---------------------|
| 1 <sup>c</sup> | 1.4                 | 10 mol % $\text{CuCl}_2$ | 1.5 eq. BPO                              |      | $\text{CH}_3\text{CN}$ | azirine             |
| 2 <sup>c</sup> | 1.4                 | 10 mol % $\text{CuCl}_2$ | 1.5 eq. DICP                             |      | $\text{CH}_3\text{CN}$ | azirine             |
| 3 <sup>c</sup> | 1.4                 | 10 mol % $\text{CuCl}_2$ | 1.5 eq. DTBP                             |      | $\text{CH}_3\text{CN}$ | azirine             |
| 4 <sup>c</sup> | 1.4                 | 10 mol % $\text{CuCl}_2$ | 1.5 eq. TBHP                             |      | $\text{CH}_3\text{CN}$ | azirine             |
| 5 <sup>c</sup> | 1.4                 | 10 mol % $\text{CuCl}_2$ | 1.5 eq. TBPB                             |      | $\text{CH}_3\text{CN}$ | azirine             |
| 6 <sup>c</sup> | 1.4                 | 10 mol % $\text{CuCl}_2$ | 1.5 eq. $\text{K}_2\text{S}_2\text{O}_8$ |      | $\text{CH}_3\text{CN}$ | azirine             |
| 7 <sup>c</sup> | 1.4                 | 10 mol % $\text{AgNO}_3$ | 1.0 eq. $\text{Mg}(\text{NO}_3)_2$       |      | $\text{CH}_3\text{CN}$ | azirine             |
| 8 <sup>c</sup> | 1.4                 | 10 mol % $\text{AgNO}_3$ | 1.0 eq. $\text{Zr}(\text{NO}_3)_4$       |      | $\text{CH}_3\text{CN}$ | azirine             |
| 9 <sup>c</sup> | 1.4                 | 10 mol % $\text{AgNO}_3$ | 1.0 eq. $\text{Zn}(\text{NO}_3)_2$       |      | $\text{CH}_3\text{CN}$ | azirine             |
| 10             | 1.4                 | 10 mol % $\text{AgNO}_3$ | 1.5 eq. $\text{K}_2\text{S}_2\text{O}_8$ |      | $\text{CH}_3\text{CN}$ | n.d.                |

|                 |     |                                                                |                                                      |                                         |                    |       |
|-----------------|-----|----------------------------------------------------------------|------------------------------------------------------|-----------------------------------------|--------------------|-------|
| 11              | 1.4 | 10 mol % CuCl <sub>2</sub>                                     | 1.5 eq. K <sub>2</sub> S <sub>2</sub> O <sub>8</sub> |                                         | CH <sub>3</sub> CN | n.d.  |
| 12              | 1.4 | 2 mol % Rhodamine B                                            | air                                                  |                                         | CH <sub>3</sub> CN | trace |
| 13              | 1.4 | 2 mol % Eosin Y                                                | air                                                  |                                         | CH <sub>3</sub> CN | trace |
| 14              | 1.4 | 2 mol % Rose bengal                                            | air                                                  |                                         | CH <sub>3</sub> CN | trace |
| 15              | 1.4 | 2 mol % Ru(bpy) <sub>3</sub> Cl <sub>2</sub> 6H <sub>2</sub> O | air                                                  |                                         | CH <sub>3</sub> CN | 13%   |
| 16              | 1.4 | 2 mol % Ru(bpy) <sub>3</sub> Cl <sub>2</sub> 6H <sub>2</sub> O | 1.5 eq. BPO                                          |                                         | CH <sub>3</sub> CN | n.d.  |
| 17              | 1.4 | 2 mol % Ru(bpy) <sub>3</sub> Cl <sub>2</sub> 6H <sub>2</sub> O | 1.5 eq. DICP                                         |                                         | CH <sub>3</sub> CN | 21%   |
| 18              | 1.4 | 2 mol % Ru(bpy) <sub>3</sub> Cl <sub>2</sub> 6H <sub>2</sub> O | 1.5 eq. DTBP                                         |                                         | CH <sub>3</sub> CN | trace |
| 19              | 1.4 | 2 mol % Ru(bpy) <sub>3</sub> Cl <sub>2</sub> 6H <sub>2</sub> O | 1.5 eq. TBHP                                         |                                         | CH <sub>3</sub> CN | trace |
| 20              | 1.4 | 2 mol % Ru(bpy) <sub>3</sub> Cl <sub>2</sub> 6H <sub>2</sub> O | 1.5 eq. TBPB                                         |                                         | CH <sub>3</sub> CN | 43%   |
| 21              | 1.4 | 2 mol % Ru(bpy) <sub>3</sub> Cl <sub>2</sub> 6H <sub>2</sub> O | 1.5 eq. TBPB                                         |                                         | THF                | n.d.  |
| 22              | 1.4 | 2 mol % Ru(bpy) <sub>3</sub> Cl <sub>2</sub> 6H <sub>2</sub> O | 1.5 eq. TBPB                                         |                                         | DCE                | 23%   |
| 23              | 1.4 | 2 mol % Ru(bpy) <sub>3</sub> Cl <sub>2</sub> 6H <sub>2</sub> O | 1.5 eq. TBPB                                         |                                         | DMF                | trace |
| 24              | 1.4 | 2 mol % Ru(bpy) <sub>3</sub> Cl <sub>2</sub> 6H <sub>2</sub> O | 1.5 eq. TBPB                                         |                                         | Tol                | n.d.  |
| 25              | 1.4 | 2 mol % Ru(bpy) <sub>3</sub> Cl <sub>2</sub> 6H <sub>2</sub> O | 1.5 eq. TBPB                                         | 1.5 eq. Na <sub>2</sub> CO <sub>3</sub> | CH <sub>3</sub> CN | 81%   |
| 26              | 1.4 | 2 mol % Ru(bpy) <sub>3</sub> Cl <sub>2</sub> 6H <sub>2</sub> O | 1.5 eq. TBPB                                         | 1.5 eq. K <sub>2</sub> CO <sub>3</sub>  | CH <sub>3</sub> CN | 63%   |
| 27              | 1.4 | 2 mol % Ru(bpy) <sub>3</sub> Cl <sub>2</sub> 6H <sub>2</sub> O | 1.5 eq. TBPB                                         | 1.5 eq. K <sub>3</sub> PO <sub>4</sub>  | CH <sub>3</sub> CN | 59%   |
| 28              | 1.4 | 2 mol % Ru(bpy) <sub>3</sub> Cl <sub>2</sub> 6H <sub>2</sub> O | 1.5 eq. TBPB                                         | 1.5 eq. Li <sub>2</sub> CO <sub>3</sub> | CH <sub>3</sub> CN | 57%   |
| 29              | 1.4 | 2 mol % Ru(bpy) <sub>3</sub> Cl <sub>2</sub> 6H <sub>2</sub> O | 1.5 eq. TBPB                                         | 1.5 eq. NaOAc                           | CH <sub>3</sub> CN | 70%   |
| 30              | 1.4 | 2 mol % Ru(bpy) <sub>3</sub> Cl <sub>2</sub> 6H <sub>2</sub> O | 1.5 eq. TBPB                                         | 1.5 eq. K <sub>2</sub> HPO <sub>4</sub> | CH <sub>3</sub> CN | 75%   |
| 31              | 1.4 | 2 mol % Ru(bpy) <sub>3</sub> Cl <sub>2</sub> 6H <sub>2</sub> O | 1.5 eq. TBPB                                         | 1.5 eq. DABCO                           | CH <sub>3</sub> CN | 64%   |
| 32              | 1.4 | 2 mol % Ru(bpy) <sub>3</sub> Cl <sub>2</sub> 6H <sub>2</sub> O | 1.5 eq. TBPB                                         | 1.2 eq. Na <sub>2</sub> CO <sub>3</sub> | CH <sub>3</sub> CN | 80%   |
| 33              | 1.4 | 2 mol % Ru(bpy) <sub>3</sub> Cl <sub>2</sub> 6H <sub>2</sub> O | 1.8 eq. TBPB                                         | 1.2 eq. Na <sub>2</sub> CO <sub>3</sub> | CH <sub>3</sub> CN | 90%   |
| 34              | 1.4 | 2 mol % Ru(bpy) <sub>3</sub> Cl <sub>2</sub> 6H <sub>2</sub> O | 2.0 eq. TBPB                                         | 1.2 eq. Na <sub>2</sub> CO <sub>3</sub> | CH <sub>3</sub> CN | 90%   |
| 35              | 1.4 | 1 mol % Ru(bpy) <sub>3</sub> Cl <sub>2</sub> 6H <sub>2</sub> O | 1.8 eq. TBPB                                         | 1.2 eq. Na <sub>2</sub> CO <sub>3</sub> | CH <sub>3</sub> CN | 66%   |
| 36 <sup>d</sup> | 1.4 | 2 mol % Ru(bpy) <sub>3</sub> Cl <sub>2</sub> 6H <sub>2</sub> O | 1.8 eq. TBPB                                         | 1.2 eq. Na <sub>2</sub> CO <sub>3</sub> | CH <sub>3</sub> CN | n.d.  |
| 37              | 1.4 |                                                                | 1.8 eq. TBPB                                         | 1.2 eq. Na <sub>2</sub> CO <sub>3</sub> | CH <sub>3</sub> CN | n.d.  |
| 38              | 1.4 | 2 mol % Ru(bpy) <sub>3</sub> Cl <sub>2</sub> 6H <sub>2</sub> O |                                                      | 1.2 eq. Na <sub>2</sub> CO <sub>3</sub> | CH <sub>3</sub> CN | n.d.  |
| 39 <sup>e</sup> | 1.4 | 2 mol % Ru(bpy) <sub>3</sub> Cl <sub>2</sub> 6H <sub>2</sub> O | 1.8 eq. TBPB                                         | 1.2 eq. Na <sub>2</sub> CO <sub>3</sub> | CH <sub>3</sub> CN | 71%   |
| 40 <sup>f</sup> | 1.4 | 2 mol % Ru(bpy) <sub>3</sub> Cl <sub>2</sub> 6H <sub>2</sub> O | 1.8 eq. TBPB                                         | 1.2 eq. Na <sub>2</sub> CO <sub>3</sub> | CH <sub>3</sub> CN | n.d.  |

<sup>a</sup> Reaction conditions: a solution of 1a, 2a, oxidant and photocatalyst (1equiv.=0.2 mmol) in the indicated solvent (0.1 M) was irradiated by 3W blue LED lamp at rt for 12 h under Ar. <sup>b</sup> Isolated yield. <sup>c</sup> at 80 °C <sup>d</sup> No irradiation. <sup>e</sup> Irradiated by 3W green LED lamp. <sup>f</sup> Irradiated by 9W white LED lamp.

**3-([1,1'-biphenyl]-2-yl)-2H-azirine:** Colorless liquid, <sup>1</sup>H NMR (300 MHz, CDCl<sub>3</sub>) δ 8.04-8.01(1H, m), 7.33-7.63 (8H, m), 1.50 (2H, s); <sup>13</sup>C NMR (75 MHz, CDCl<sub>3</sub>) δ 166.02, 143.74, 138.50, 132.34, 130.61, 130.23, 129.62, 127.80, 127.65, 123.15, 21.72.

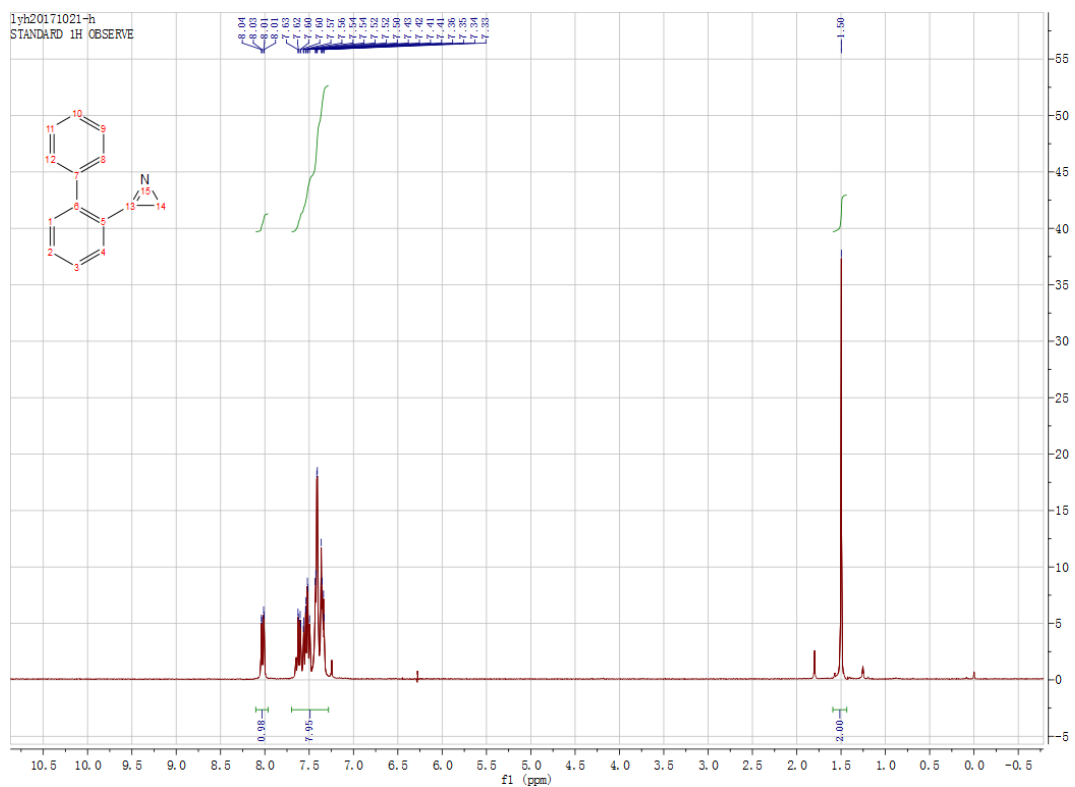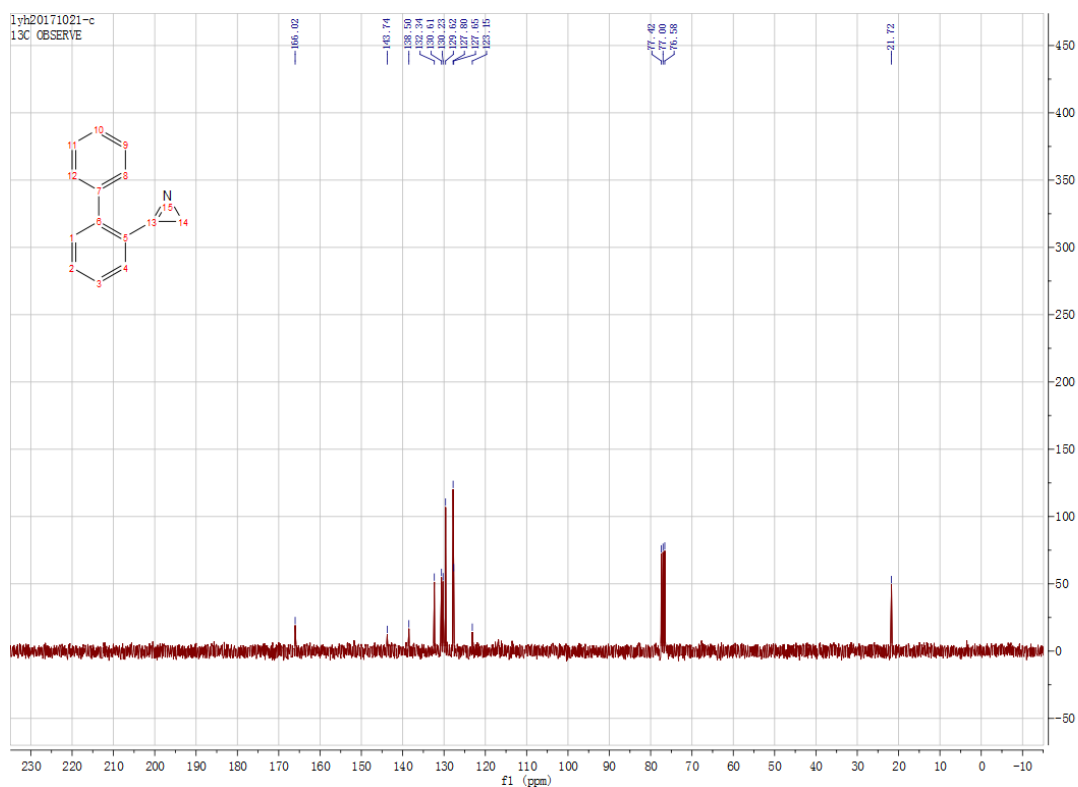

## 4.2. General procedure for Phosphoryl radical onto vinyl azides

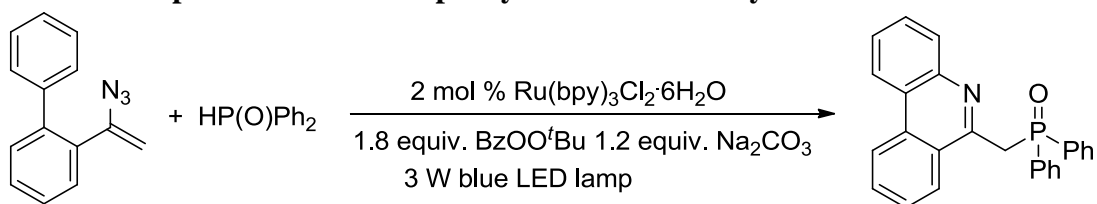

A 10 mL round bottom flask equipped with a rubber septum and magnetic stir bar was charged with vinyl azides (0.42 mmol, 1.4 equiv.), Ru(bpy)<sub>3</sub>Cl<sub>2</sub>·6H<sub>2</sub>O (0.006 mmol, 0.02 equiv.), HP(O)R<sub>4</sub>R<sub>5</sub> (0.3 mmol, 1.0 equiv.), Na<sub>2</sub>CO<sub>3</sub> (0.36 mmol, 1.2 equiv.). The flask was evacuated and backfilled with Ar for 3 times. tert-butylbenzoperoxoate (0.54 mmol, 1.8 equiv.) and CH<sub>3</sub>CN (3.0 mL, 0.1 M) were added with syringe under N<sub>2</sub>. The mixture was then irradiated by a 3 W blue LED lamp (away from tube 5-10 cm) at room temperature for 12 h (monitored by TLC). After substrate was consumed and the solvent was removed under vacuum, the residue was purified by column chromatography to give the product.

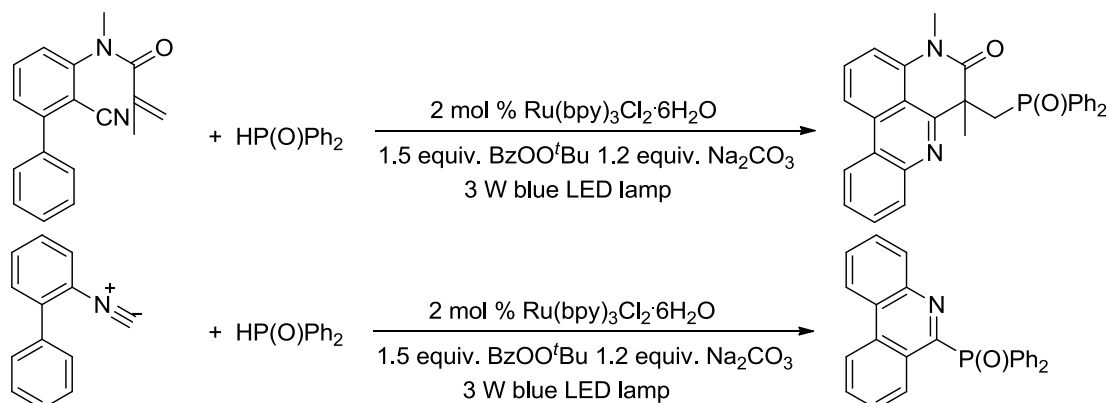

A 10 mL round bottom flask equipped with a rubber septum and magnetic stir bar was charged with nitriles and isocyanides (0.2 mmol, 1.0 equiv.), Ru(bpy)<sub>3</sub>Cl<sub>2</sub>·6H<sub>2</sub>O (0.004 mmol, 0.02 equiv.), HP(O)R<sub>4</sub>R<sub>5</sub> (0.24 mmol, 1.2 equiv.), Na<sub>2</sub>CO<sub>3</sub> (0.24 mmol, 1.2 equiv.). The flask was evacuated and backfilled with Ar for 3 times. tert-butylbenzoperoxoate (0.3 mmol, 1.5 equiv.) and CH<sub>3</sub>CN (2.0 mL, 0.1 M) were added with syringe under N<sub>2</sub>. The mixture was then irradiated by a 3 W blue LED lamp (away from tube 5-10 cm) at room temperature for 12 h (monitored by TLC). After substrate was consumed and the solvent was removed under vacuum, the residue was purified by column chromatography to give the product.

### 4.3. Characterization data of new phenanthridine

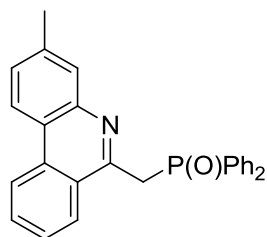

**6-((diphenylphosphoryl)methyl)-3-methylphenanthridine(3a)**, 110 mg, Yield: 90 %, white solid (M.P. = 189-190 °C), <sup>1</sup>H NMR (400 MHz, CDCl<sub>3</sub>) δ 8.40 (2H, d, *J* = 8.9 Hz), 8.27 (1H, d, *J* = 8.4 Hz), 7.84-7.90 (4H, m), 7.67-7.70 (2H, m), 7.57 (1H, t, *J* = 8.1 Hz), 7.32-7.42 (7H, m), 4.49 (2H, d, *J* = 15.2 Hz), 2.50 (3H, s); <sup>31</sup>P NMR (162 MHz, CDCl<sub>3</sub>) δ 29.83; <sup>13</sup>C NMR (100 MHz, CDCl<sub>3</sub>) δ 153.74(d, *J* = 7.9 Hz), 143.27(d, *J* = 2.2 Hz), 132.69, 132.20 (d, *J* = 100.8 Hz), 131.54, 131.52 (d, *J* = 2.7 Hz), 131.20 (d, *J* = 9.5 Hz), 130.36, 128.69, 128.34, 128.12 (d, *J* = 12.1 Hz), 127.54, 126.76, 125.61 (d, *J* = 2.1 Hz), 121.56, 121.15, 39.76 (d, *J* = 62.9 Hz), 21.38. HRMS calcd for C<sub>27</sub>H<sub>22</sub>NOP: [M+H]<sup>+</sup> 408.1512, found 408.1516.



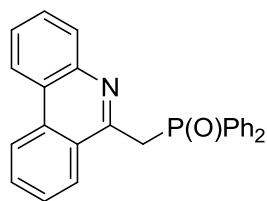

**6-((diphenylphosphoryl)methyl)phenanthridine(3b)**, 111 mg, Yield: 94 %, white solid (M.P. = 202-203 °C),  $^1\text{H}$  NMR (400 MHz,  $\text{CDCl}_3$ )  $\delta$  8.54 (1H, d,  $J$  = 8.3 Hz), 8.45-8.48 (2H, m), 7.84-7.89 (4H, m), 7.78 (1H, t,  $J$  = 8.1 Hz), 7.56-7.68 (3H, m), 7.35-7.45 (6H, m), 4.54 (2H, d,  $J$  = 15.1 Hz);  $^{31}\text{P}$  NMR (162 MHz,  $\text{CDCl}_3$ )  $\delta$  29.96;  $^{13}\text{C}$  NMR (100 MHz,  $\text{CDCl}_3$ )  $\delta$  153.86 (d,  $J$  = 8.0 Hz), 143.38, 138.37, 132.69, 132.46 (d,  $J$  = 101.1 Hz), 132.31 (d,  $J$  = 8.2 Hz), 131.60 (d,  $J$  = 2.6 Hz), 131.26 (d,  $J$  = 9.5 Hz), 130.53, 129.22, 128.35, 128.18 (d,  $J$  = 12.1 Hz), 127.66, 127.34, 126.64, 125.99 (d,  $J$  = 2.1 Hz), 123.53, 121.83, 39.78 (d,  $J$  = 62.9 Hz). HRMS calcd for  $\text{C}_{26}\text{H}_{20}\text{NOP}$ :  $[\text{M} + \text{H}]^+$  394.1355, found 394.1358.

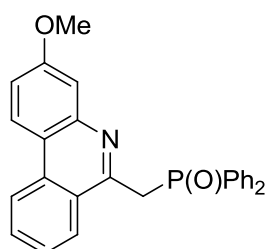

**6-((diphenylphosphoryl)methyl)-3-methoxyphenanthridine(3c)**, 115 mg, Yield: 91 %, white solid (M.P. = 196-197 °C),  $^1\text{H}$  NMR (400 MHz,  $\text{CDCl}_3$ )  $\delta$  8.32-8.42 (3H, m), 7.82-7.88 (4H, m), 7.72 (1H, t,  $J$  = 9.0 Hz), 7.56 (1H, t,  $J$  = 9.0 Hz), 7.37-7.46 (6H, m), 7.27 (1H, s), 7.21 (1H, dd,  $J$  = 9.0 Hz,  $J$  = 3.0 Hz), 4.52 (2H, d,  $J$  = 15.2 Hz), 3.93 (3H, s);  $^{31}\text{P}$  NMR (162 MHz,  $\text{CDCl}_3$ )  $\delta$  29.70;  $^{13}\text{C}$  NMR (100 MHz,  $\text{CDCl}_3$ )  $\delta$  159.85, 154.39 (d,  $J$  = 7.9 Hz), 144.85, 133.00, 132.55 (d,  $J$  = 100.8 Hz), 131.63 (d,  $J$  = 2.8 Hz), 131.29 (d,  $J$  = 9.5 Hz), 130.67, 128.23 (d,  $J$  = 12.1 Hz), 127.73, 126.30, 125.14, 123.11, 121.38, 117.70, 117.57, 109.15, 55.46, 39.89 (d,  $J$  = 62.8 Hz); HRMS calcd for  $\text{C}_{27}\text{H}_{22}\text{NO}_2\text{P}$ :  $[\text{M} + \text{H}]^+$  424.1461, found 424.1464.

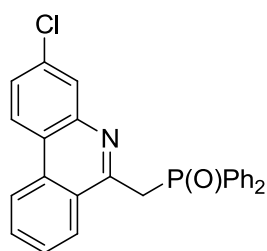

**3-chloro-6-((diphenylphosphoryl)methyl)phenanthridine(3d)**: 70 mg, Yield: 55 %, white solid (M.P. = 203-204 °C),  $^1\text{H}$  NMR (400 MHz,  $\text{CDCl}_3$ )  $\delta$  8.49 (2H, d,  $J$  = 4.5 Hz), 8.47 (1H, d,  $J$  = 4.5 Hz), 8.38 (1H, d,  $J$  = 8.8 Hz), 7.84-7.89 (4H, m), 7.80 (1H, t,  $J$  = 8.2 Hz), 7.69 (1H, t,  $J$  = 8.0 Hz), 7.53 (1H, dd,  $J$  = 8.8 Hz,  $J$  = 2.0 Hz), 7.38-7.48 (6H, m), 4.52 (2H, d,  $J$  = 15.0 Hz);  $^{31}\text{P}$  NMR (162 MHz,  $\text{CDCl}_3$ )  $\delta$  29.84;  $^{13}\text{C}$  NMR (100 MHz,  $\text{CDCl}_3$ )  $\delta$  155.44 (d,  $J$  = 7.9 Hz), 143.96, 133.98, 132.36 (d,  $J$  = 101.1 Hz), 132.34, 131.79 (d,  $J$  = 2.6 Hz), 131.27 (d,  $J$  = 9.5 Hz), 131.03, 128.42, 128.32 (d,  $J$  = 11.9 Hz), 127.96, 127.74, 127.23, 126.00, 123.32, 122.11, 121.82, 39.83 (d,  $J$  = 62.5 Hz); HRMS calcd for  $\text{C}_{26}\text{H}_{19}\text{ClNOP}$ :  $[\text{M} + \text{H}]^+$  428.0966, found 428.0969.

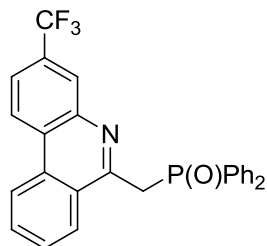

**6-((diphenylphosphoryl)methyl)-3-(trifluoromethyl)phenanthridine(3e):** 119 mg, Yield: 86 %, white solid (M.P. = 205-207 °C),  $^1\text{H}$  NMR (400 MHz,  $\text{CDCl}_3$ )  $\delta$  8.49-8.54 (3H, m), 8.13 (1H, s), 7.84-7.90 (4H, m), 7.82 (1H, t,  $J = 8.2$  Hz), 7.74 (2H, t,  $J = 7.3$  Hz), 7.38-7.49 (6H, m), 4.53 (2H, d,  $J = 14.9$  Hz);  $^{31}\text{P}$  NMR (162 MHz,  $\text{CDCl}_3$ )  $\delta$  29.84;  $^{19}\text{F}$  NMR (376 MHz,  $\text{CDCl}_3$ )  $\delta$  -62.2;  $^{13}\text{C}$  NMR (100 MHz,  $\text{CDCl}_3$ )  $\delta$  155.74 (d,  $J = 8.0$  Hz), 142.58 (d,  $J = 2.3$  Hz), 132.32 (d,  $J = 101.4$  Hz), 131.92, 131.83 (d,  $J = 2.3$  Hz), 131.22 (d,  $J = 9.5$  Hz), 131.14, 130.14 (q,  $J = 65.6$  Hz), 128.58, 128.35 (d,  $J = 12.2$  Hz), 128.03, 126.70 (d,  $J = 4.3$  Hz), 126.63 (d,  $J = 1.6$  Hz), 125.87, 122.96, 122.49 (d,  $J = 2.9$  Hz), 122.24, 39.89 (d,  $J = 62.2$  Hz). HRMS calcd for  $\text{C}_{27}\text{H}_{19}\text{F}_3\text{NOP}$ :  $[\text{M} + \text{H}]^+$  462.1629, found 462.1236.

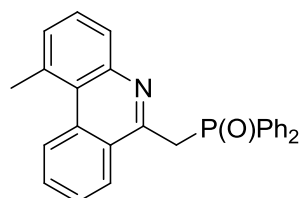

**6-((diphenylphosphoryl)methyl)-1-methylphenanthridine(3f):** 93 mg, Yield: 76 %, white solid (M.P. = 147-149 °C),  $^1\text{H}$  NMR (400 MHz,  $\text{CDCl}_3$ )  $\delta$  8.79 (1H, d,  $J = 8.5$  Hz), 8.51 (1H, d,  $J = 8.0$  Hz), 7.85-7.90 (4H, m), 7.75-7.79 (2H, m), 7.68 (1H, t,  $J = 7.4$  Hz), 7.52 (1H, t,  $J = 7.8$  Hz), 7.34-7.43 (7H, m), 4.53 (2H, d,  $J = 15.1$  Hz), 3.04 (3H, s);  $^{31}\text{P}$  NMR (162 MHz,  $\text{CDCl}_3$ )  $\delta$  30.06;  $^{13}\text{C}$  NMR (100 MHz,  $\text{CDCl}_3$ )  $\delta$  153.51 (d,  $J = 7.9$  Hz), 144.83, 134.85, 134.07, 132.61 (d,  $J = 100.8$  Hz), 131.62 (d,  $J = 2.7$  Hz), 131.32 (d,  $J = 9.5$  Hz), 130.97, 129.75, 128.22 (d,  $J = 11.8$  Hz), 127.73, 127.53, 126.98 (d,  $J = 2.2$  Hz), 126.66, 126.39, 123.38, 39.77 (d,  $J = 63.1$  Hz), 26.66. HRMS calcd for  $\text{C}_{27}\text{H}_{22}\text{NOP}$ :  $[\text{M} + \text{H}]^+$  408.1512, found 408.1514.

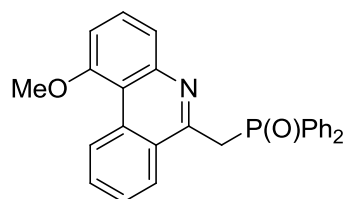

**6-((diphenylphosphoryl)methyl)-1-methoxyphenanthridine(3g):** 50 mg, Yield: 40 %, white solid (M.P. = 151-153 °C),  $^1\text{H}$  NMR (400 MHz,  $\text{CDCl}_3$ )  $\delta$  9.50 (1H, d,  $J = 8.6$  Hz), 8.45 (1H, d,  $J = 8.0$  Hz), 7.84-7.89 (4H, m), 7.76 (1H, t,  $J = 8.2$  Hz), 7.64 (1H, t,  $J = 7.3$  Hz), 7.50-7.56 (2H, m), 7.33-7.43 (6H, m), 7.21 (1H, dd,  $J = 7.1$  Hz,  $J = 2.0$  Hz), 4.53 (2H, d,  $J = 15.2$  Hz), 4.07 (3H, s);  $^{31}\text{P}$  NMR (162 MHz,  $\text{CDCl}_3$ )  $\delta$  29.98;  $^{13}\text{C}$  NMR (100 MHz,  $\text{CDCl}_3$ )  $\delta$  157.91, 154.44 (d,  $J = 7.6$  Hz), 145.38, 132.79, 132.60 (d,  $J = 100.8$  Hz), 131.59 (d,  $J = 2.7$  Hz), 131.33 (d,  $J = 9.5$  Hz), 130.41, 128.19 (d,  $J = 11.9$  Hz), 127.84, 127.72, 127.12, 126.69, 126.34 (d,  $J = 2.2$  Hz), 122.13, 114.33, 107.85, 55.77, 39.87 (d,  $J = 63.0$  Hz). HRMS calcd for  $\text{C}_{27}\text{H}_{22}\text{NO}_2\text{P}$ :  $[\text{M} + \text{H}]^+$  424.1461, found 424.1463.

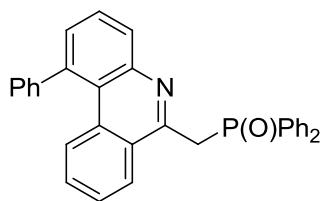

**6-((diphenylphosphoryl)methyl)-1-phenylphenanthridine(3h):** 104 mg, Yield: 74 %, white solid (M.P. = 183-185 °C),  $^1\text{H}$  NMR (400 MHz,  $\text{CDCl}_3$ )  $\delta$  8.40 (1H, d,  $J$  = 8.2 Hz), 7.87-7.93 (5H, m), 7.61 (1H, t,  $J$  = 7.5 Hz), 7.58 (1H, d,  $J$  = 8.6 Hz), 7.50 (1H, t,  $J$  = 7.7 Hz), 7.33-7.45 (12H, m), 7.50 (1H, t,  $J$  = 7.5 Hz), 4.54 (2H, d,  $J$  = 15.1 Hz);  $^{31}\text{P}$  NMR (162 MHz,  $\text{CDCl}_3$ )  $\delta$  30.00;  $^{13}\text{C}$  NMR (100 MHz,  $\text{CDCl}_3$ )  $\delta$  154.12(d,  $J$  = 7.8 Hz), 144.48, 144.07, 139.80, 132.90, 132.64 (d,  $J$  = 101.1 Hz), 131.66 (d,  $J$  = 2.6 Hz), 131.34 (d,  $J$  = 9.5 Hz), 130.46, 129.02, 128.98, 128.92, 128.89, 128.25 (d,  $J$  = 11.9 Hz), 127.33 (d,  $J$  = 2.3 Hz), 127.27, 127.06 (d,  $J$  = 2.0 Hz), 127.02, 126.85, 121.95, 39.70 (d,  $J$  = 63.1 Hz). HRMS calcd for  $\text{C}_{32}\text{H}_{24}\text{NOP}$ :  $[\text{M}+\text{H}]^+$  470.1668, found 470.1671.

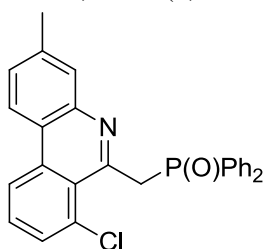

**7-chloro-6-((diphenylphosphoryl)methyl)-3-methylphenanthridine(3i):** 113 mg, Yield: 85 %, white solid (M.P. = 202-204 °C),  $^1\text{H}$  NMR (400 MHz,  $\text{CDCl}_3$ )  $\delta$  8.34 (1H, d,  $J$  = 8.9 Hz), 8.26 (1H, d,  $J$  = 1.9 Hz), 8.24 (1H, d,  $J$  = 8.4 Hz), 7.83-7.89 (4H, m), 7.68 (1H, s), 7.62 (1H, dd,  $J$  = 8.8 Hz,  $J$  = 2.0 Hz), 7.36-7.45 (7H, m), 4.45 (2H, d,  $J$  = 15.2 Hz), 2.53 (3H, s);  $^{31}\text{P}$  NMR (162 MHz,  $\text{CDCl}_3$ )  $\delta$  29.56;  $^{13}\text{C}$  NMR (100 MHz,  $\text{CDCl}_3$ )  $\delta$  152.75 (d,  $J$  = 7.9 Hz), 143.39 (d,  $J$  = 2.1 Hz), 138.93, 132.68, 132.47 (d,  $J$  = 101.0 Hz), 131.73 (d,  $J$  = 2.7 Hz), 131.29 (d,  $J$  = 9.5 Hz), 131.16, 130.93, 128.95, 128.88, 128.27 (d,  $J$  = 12.1 Hz), 126.75, 126.50 (d,  $J$  = 2.2 Hz), 123.41, 121.50, 120.59, 39.57 (d,  $J$  = 62.8 Hz), 21.46. HRMS calcd for  $\text{C}_{27}\text{H}_{21}\text{ClNOP}$ :  $[\text{M}+\text{H}]^+$  442.1122, found 442.1126.

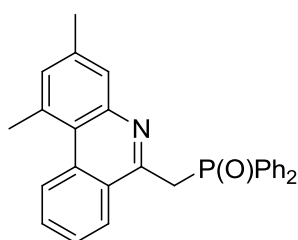

**6-((diphenylphosphoryl)methyl)-1,3-dimethylphenanthridine(3j):** 95 mg, Yield: 75 %, white solid (M.P. = 171-173 °C),  $^1\text{H}$  NMR (400 MHz,  $\text{CDCl}_3$ )  $\delta$  8.77 (1H, d,  $J$  = 8.5 Hz), 8.45 (1H, d,  $J$  = 8.1 Hz), 7.86-7.91 (4H, m), 7.73 (1H, t,  $J$  = 7.2 Hz), 7.65 (1H, t,  $J$  = 7.4 Hz), 7.35-7.45 (7H, m), 7.29 (1H, d,  $J$  = 15.0 Hz), 4.53(2H, d,  $J$  = 15.0 Hz), 2.99 (3H, s), 2.54 (3H, s);  $^{31}\text{P}$  NMR (162 MHz,  $\text{CDCl}_3$ )  $\delta$  30.00;  $^{13}\text{C}$  NMR (100 MHz,  $\text{CDCl}_3$ )  $\delta$  151.69 (d,  $J$  = 8.0 Hz), 143.20 (d,  $J$  = 2.2 Hz), 135.50, 134.38, 132.89 (d,  $J$  = 100.9 Hz), 132.25, 131.53 (d,  $J$  = 2.7 Hz), 131.29 (d,  $J$  = 9.5 Hz), 130.40, 129.32, 128.32, 128.23 (d,  $J$  = 12.0 Hz), 127.28, 126.83 (d,  $J$  = 2.3 Hz), 126.57, 126.48, 123.28 (d,  $J$  = 1.4 Hz), 39.24 (d,  $J$  = 64.3 Hz), 26.59, 18.65. HRMS calcd for  $\text{C}_{28}\text{H}_{24}\text{NOP}$ :  $[\text{M}+\text{H}]^+$  422.1668, found 422.1670.

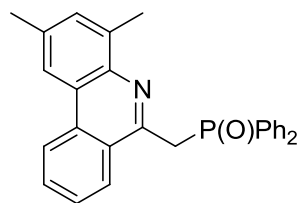

**6-((diphenylphosphoryl)methyl)-2,4-dimethylphenanthridine(3k):** 116 mg, Yield: 92 %, white solid (M.P. = 174-176 °C),  $^1\text{H}$  NMR (400 MHz,  $\text{CDCl}_3$ )  $\delta$  8.49 (1H, d,  $J$  = 8.3 Hz), 8.34 (1H, d,  $J$  = 8.2 Hz), 8.08 (1H, s), 7.85-7.91 (4H, m), 7.70 (1H, t,  $J$  = 8.0 Hz), 7.59 (1H, t,  $J$  = 7.2 Hz), 7.33-7.44 (6H, m), 7.30 (1H, s), 4.50 (2H, d,  $J$  = 15.1 Hz), 2.55 (3H, s), 2.50 (3H, s);  $^{31}\text{P}$  NMR (162 MHz,  $\text{CDCl}_3$ )  $\delta$  30.20;  $^{13}\text{C}$  NMR (100 MHz,  $\text{CDCl}_3$ )  $\delta$  151.02 (d,  $J$  = 8.1 Hz), 140.34 (d,  $J$  = 2.2 Hz), 136.97, 135.93, 132.84 (d,  $J$  = 100.6 Hz), 132.81, 131.50 (d,  $J$  = 2.7 Hz), 131.31 (d,  $J$  = 9.4 Hz), 130.81, 129.99, 128.16 (d,  $J$  = 12.0 Hz), 127.17, 126.98, 125.88 (d,  $J$  = 2.3 Hz), 123.26, 122.11, 119.22, 39.08 (d,  $J$  = 64.3 Hz), 21.85, 18.04. HRMS calcd for  $\text{C}_{28}\text{H}_{24}\text{NOP}$ :  $[\text{M}+\text{H}]^+$  422.1668, found 422.1670.

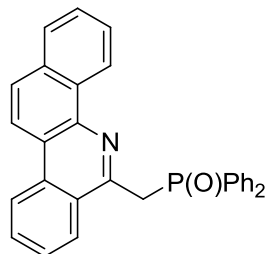

**6-((diphenylphosphoryl)methyl)benzo[c]phenanthridine(3l):** 70 mg, Yield: 53 %, white solid (M.P. = 186-188 °C),  $^1\text{H}$  NMR (400 MHz,  $\text{CDCl}_3$ )  $\delta$  8.88-8.91 (1H, m), 8.59 (1H, d,  $J$  = 8.3 Hz), 8.45 (2H, t,  $J$  = 10.3 Hz), 7.89-7.96 (6H, m), 7.80 (1H, t,  $J$  = 7.4 Hz), 7.61-7.69 (3H, m), 7.36-7.45 (6H, m), 4.66 (2H, d,  $J$  = 15.0 Hz);  $^{31}\text{P}$  NMR (162 MHz,  $\text{CDCl}_3$ )  $\delta$  30.14;  $^{13}\text{C}$  NMR (100 MHz,  $\text{CDCl}_3$ )  $\delta$  152.33 (d,  $J$  = 8.2 Hz), 140.01 (d,  $J$  = 2.2 Hz), 133.15, 133.10, 132.74 (d,  $J$  = 100.9 Hz), 131.65 (d,  $J$  = 2.7 Hz), 131.35 (d,  $J$  = 9.4 Hz), 130.44, 128.32 (d,  $J$  = 12.0 Hz), 127.44, 127.30, 127.16, 126.51, 126.48, 124.80, 122.38, 120.44, 119.75, 39.21 (d,  $J$  = 64.2 Hz). HRMS calcd for  $\text{C}_{30}\text{H}_{22}\text{NOP}$ :  $[\text{M}+\text{H}]^+$  444.1512, found 444.1515.

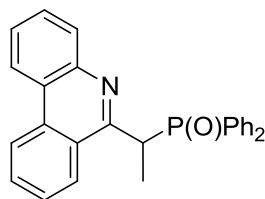

**6-(1-(diphenylphosphoryl)ethyl)phenanthridine(3m):** 67 mg, Yield: 55 %, white solid (M.P. = 194-197 °C),  $^1\text{H}$  NMR (400 MHz,  $\text{CDCl}_3$ )  $\delta$  8.56 (1H, d,  $J$  = 8.2 Hz), 8.49 (1H, d,  $J$  = 8.0 Hz), 8.39 (1H, d,  $J$  = 7.3 Hz), 8.01-8.05 (3H, m), 7.67-7.77 (4H, m), 7.57-7.64 (2H, m), 7.25-7.41 (6H, m), 4.45 (2H, td,  $J$  = 22.9 Hz,  $J$  = 7.4 Hz), 1.88 (3H, dd,  $J$  = 16.0 Hz,  $J$  = 7.2 Hz);  $^{31}\text{P}$  NMR (162 MHz,  $\text{CDCl}_3$ )  $\delta$  34.25;  $^{13}\text{C}$  NMR (100 MHz,  $\text{CDCl}_3$ )  $\delta$  158.85 (d,  $J$  = 4.1 Hz), 143.12, 132.92, 132.28 (d,  $J$  = 97.2 Hz), 131.78 (dd,  $J$  = 62.3 Hz,  $J$  = 9.0 Hz), 131.34 (dd,  $J$  = 11.3 Hz,  $J$  = 2.6 Hz), 131.11, 130.22, 129.50, 128.48, 127.99 (dd,  $J$  = 11.45 Hz,  $J$  = 3.7 Hz), 127.19, 126.78, 125.18 (d,  $J$  = 3.5 Hz), 123.35, 122.23, 121.51, 42.44 (d,  $J$  = 68.2 Hz), 15.12 (d,  $J$  = 2.3 Hz). HRMS calcd for  $\text{C}_{27}\text{H}_{22}\text{NOP}$ :  $[\text{M}+\text{H}]^+$  408.1512, found 408.1515.

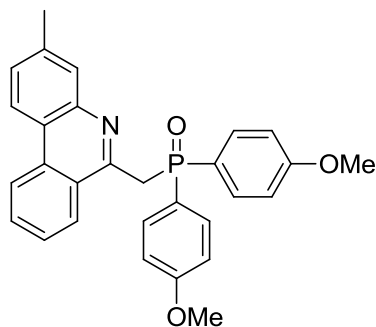

**6-((bis(4-methoxyphenyl)phosphoryl)methyl)-3-methylphenanthridine(3n):** 98 mg, Yield: 70 %, white solid (M.P. = 142-144 °C),  $^1\text{H}$  NMR (400 MHz,  $\text{CDCl}_3$ )  $\delta$  8.46 (1H, d,  $J$  = 8.2 Hz), 8.41 (1H, d,  $J$  = 8.2 Hz), 8.33 (1H, d,  $J$  = 8.4 Hz), 7.70-7.79 (6H, m), 7.60 (1H, t,  $J$  = 7.4 Hz), 7.39 (1H, d,  $J$  = 8.1 Hz), 6.86 (4H, dd,  $J$  = 8.8 Hz,  $J$  = 2.1 Hz), 4.45 (2H, d,  $J$  = 15.4 Hz), 3.76 (6H, s), 2.54 (3H, s);  $^{31}\text{P}$  NMR (162 MHz,  $\text{CDCl}_3$ )  $\delta$  29.96;  $^{13}\text{C}$  NMR (100 MHz,  $\text{CDCl}_3$ )  $\delta$  162.70 (d,  $J$  = 2.8 Hz), 154.28 (d,  $J$  = 7.8 Hz), 143.51, 138.42, 133.11 (d,  $J$  = 10.9 Hz), 132.75, 130.38, 128.79, 128.33, 128.28 (d,  $J$  = 101.6 Hz), 126.81, 125.74 (d,  $J$  = 2.0 Hz), 124.64, 123.57, 121.61 (d,  $J$  = 5.0 Hz), 121.24, 113.70 (d,  $J$  = 13.9 Hz), 55.17, 40.38 (d,  $J$  = 62.9 Hz), 21.44. HRMS calcd for  $\text{C}_{29}\text{H}_{26}\text{NO}_3\text{P}$ :  $[\text{M}+\text{H}]^+$  468.1723, found 468.1724.

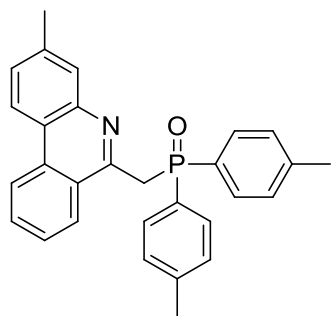

**6-((dip-tolylphosphoryl)methyl)-3-methylphenanthridine(3o):** 82 mg, Yield: 63 %, white solid (M.P. = 158-160 °C),  $^1\text{H}$  NMR (400 MHz,  $\text{CDCl}_3$ )  $\delta$  2.32 (6H, s), 2.54 (3H, s), 4.48 (2H, d,  $J$  = 15.2 Hz), 7.15-7.18 (4H, m), 7.40 (1H, d,  $J$  = 8.4 Hz), 7.61 (1H, d,  $J$  = 7.8 Hz), 7.70-7.77 (6H, m), 8.34 (1H, d,  $J$  = 8.4 Hz), 7.43-7.48 (2H, m);  $^{31}\text{P}$  NMR (162 MHz,  $\text{CDCl}_3$ )  $\delta$  30.19;  $^{13}\text{C}$  NMR (100 MHz,  $\text{CDCl}_3$ )  $\delta$  21.47, 22.61, 40.16 (d,  $J$  = 62.8 Hz), 121.31, 121.60, 121.66, 125.80, 126.86, 127.86, 128.36, 128.82, 128.94 (d,  $J$  = 12.3 Hz), 129.63 (d,  $J$  = 103.2 Hz), 130.42, 131.30 (d,  $J$  = 9.9 Hz), 132.82, 138.43, 141.93 (d,  $J$  = 2.6 Hz), 143.53, 154.19 (d,  $J$  = 7.8 Hz). HRMS calcd for  $\text{C}_{29}\text{H}_{26}\text{NOP}$ :  $[\text{M}+\text{H}]^+$  436.1825, found 436.1824.

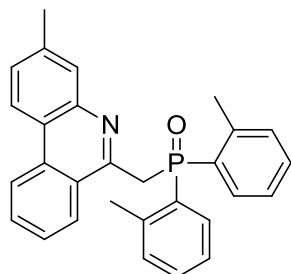

**6-((dio-tolylphosphoryl)methyl)-3-methylphenanthridine(3p):** 70 mg, Yield: 54 %, white solid (M.P. = 168-170 °C),  $^1\text{H}$  NMR (400 MHz,  $\text{CDCl}_3$ )  $\delta$  8.53 (1H, t,  $J$  = 8.2 Hz), 8.47 (1H, t,  $J$  = 8.2 Hz), 8.37 (1H, t,  $J$  = 8.4 Hz), 8.03 (1H, t,  $J$  = 7.5 Hz), 8.00 (1H, t,  $J$  = 7.7 Hz), 7.77 (1H, t,  $J$  = 7.4 Hz), 7.62 (1H, t,  $J$  = 7.6 Hz), 7.62 (1H, s), 7.42 (1H, d,  $J$  = 8.2 Hz), 7.35 (2H, t,  $J$  = 7.5 Hz), 7.24

(3H, t,  $J = 7.6$  Hz), 7.12 (4H, d,  $J = 4.5$  Hz), 7.10 (1H, d,  $J = 4.6$  Hz), 4.61 (2H, d,  $J = 14.7$  Hz), 2.54 (3H, s), 2.24 (6H, s);  $^{31}\text{P}$  NMR (162 MHz  $\text{CDCl}_3$ )  $\delta$  32.71;  $^{13}\text{C}$  NMR (100 MHz,  $\text{CDCl}_3$ )  $\delta$  154.12, 141.92 (d,  $J = 2.0$  Hz), 138.38, 132.80, 132.22, 132.12, 131.94, 131.62, 131.59, 131.48, 130.97, 130.40, 128.78, 128.38, 128.03, 126.68, 126.00 (d,  $J = 2.0$  Hz), 125.46, 125.34, 121.62, 121.55, 121.24 (d,  $J = 6.5$  Hz), 39.06 (d,  $J = 62.5$  Hz), 21.45, 21.17 (d,  $J = 4.2$  Hz). HRMS calcd for  $\text{C}_{29}\text{H}_{26}\text{NOP}$ :  $[\text{M} + \text{H}]^+$  436.1825, found 436.1823.

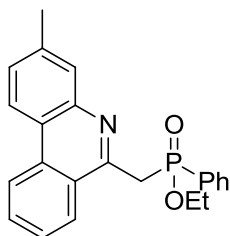

**ethyl (3-methylphenanthridin-6-yl)methyl(phenyl)phosphinate(3q):** 27 mg, Yield: 24 %, colorless oil,  $^1\text{H}$  NMR (400 MHz,  $\text{CDCl}_3$ )  $\delta$  8.52 (1H, d,  $J = 8.2$  Hz), 8.38 (1H, d,  $J = 8.4$  Hz), 8.24 (1H, d,  $J = 8.2$  Hz), 7.67-7.78 (4H, m), 7.58 (1H, t,  $J = 8.1$  Hz), 7.42-7.47 (2H, m), 7.26-7.36 (2H, m), 3.86-4.16 (2H, m), 4.15 (2H, d,  $J = 18.5$  Hz), 2.55 (3H, s), 1.20 (3H, t,  $J = 7.0$  Hz);  $^{31}\text{P}$  NMR (162 MHz,  $\text{CDCl}_3$ )  $\delta$  38.34;  $^{13}\text{C}$  NMR (100 MHz,  $\text{CDCl}_3$ )  $\delta$  153.54 (d,  $J = 8.1$  Hz), 143.64 (d,  $J = 2.7$  Hz), 138.57, 132.85, 131.13 (d,  $J = 2.8$  Hz), 131.88 (d,  $J = 9.9$  Hz), 130.48 (d,  $J = 129.8$  Hz), 130.38, 16.30 (d,  $J = 6.5$  Hz), 129.03, 128.41, 128.19 (d,  $J = 13.0$  Hz), 127.27, 126.65, 125.36 (d,  $J = 2.8$  Hz), 121.80, 121.61, 121.27 (d,  $J = 1.5$  Hz), 61.10 (d,  $J = 6.4$  Hz), 39.32 (d,  $J = 91.6$  Hz), 21.45. HRMS calcd for  $\text{C}_{23}\text{H}_{22}\text{NOP}$ :  $[\text{M} + \text{H}]^+$  375.1388, found 375.1386.

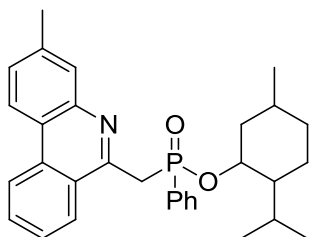

**2-isopropyl-5-methylcyclohexyl(3-methylphenanthridin-6-yl)methyl(phenyl)phosphinate(3r):** 41 mg, Yield: 28 %, white solid (M.P. = 127-129 °C),  $^1\text{H}$  NMR (400 MHz,  $\text{CDCl}_3$ )  $\delta$  8.55 (1H, d,  $J = 8.2$  Hz), 8.41 (2H, d,  $J = 8.3$  Hz), 7.83-7.89 (3H, m), 7.39 (1H, t,  $J = 7.3$  Hz), 7.66 (1H, t,  $J = 7.2$  Hz), 7.38-7.51 (4H, m), 4.16-4.25 (1H, m), 4.10 (2H, dd,  $J = 17.4$  Hz,  $J = 4.5$  Hz), 2.57 (3H, s), 1.66-1.70 (2H, m), 1.45-1.51 (2H, m), 1.18-1.22 (2H, m), 0.70-0.92 (3H, m), 0.67 (3H, d,  $J = 6.5$  Hz), 0.52 (3H, d,  $J = 7.0$  Hz), 0.24 (3H, d,  $J = 6.9$  Hz);  $^{31}\text{P}$  NMR (162 MHz,  $\text{CDCl}_3$ )  $\delta$  35.46;  $^{13}\text{C}$  NMR (100 MHz,  $\text{CDCl}_3$ )  $\delta$  153.84 (d,  $J = 9.2$  Hz), 143.77, 138.48, 133.40 (d,  $J = 128.5$  Hz), 131.92 (d,  $J = 2.8$  Hz), 132.91, 131.67 (d,  $J = 10.1$  Hz), 130.45, 129.16, 128.35, 128.14 (d,  $J = 13.0$  Hz), 127.93, 126.75, 125.58 (d,  $J = 2.2$  Hz), 121.67, 121.62, 121.41 (d,  $J = 1.4$  Hz), 48.45 (d,  $J = 6.0$  Hz), 42.90, 41.15, 40.23, 32.93, 31.34, 24.84, 22.42, 21.83, 21.49, 20.72, 14.63. HRMS calcd for  $\text{C}_{31}\text{H}_{36}\text{NO}_2\text{P}$ :  $[\text{M} + \text{H}]^+$  485.2484, found 485.2487.

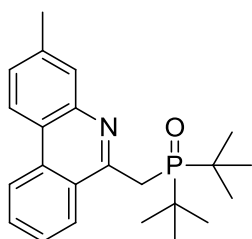

**6-((di-tert-butylphosphoryl)methyl)-3-methylphenanthridine (3s):** 78 mg, Yield: 71 %, white solid (M.P. = 166-168 °C),  $^1\text{H}$  NMR (400 MHz,  $\text{CDCl}_3$ )  $\delta$  8.80 (1H, d,  $J$  = 8.1 Hz), 8.52 (1H, d,  $J$  = 8.2 Hz), 8.41 (1H, d,  $J$  = 8.4 Hz), 7.84 (1H, s), 7.79 (1H, t,  $J$  = 7.7 Hz), 7.71 (1H, t,  $J$  = 7.2 Hz), 7.45 (1H, d,  $J$  = 8.3 Hz), 3.97 (2H, d,  $J$  = 12.2 Hz), 2.58 (3H, s), 1.31 (9H, s), 1.27 (9H, s);  $^{31}\text{P}$  NMR (162 MHz,  $\text{CDCl}_3$ )  $\delta$  60.00;  $^{13}\text{C}$  NMR (100 MHz,  $\text{CDCl}_3$ )  $\delta$  157.21 (d,  $J$  = 7.0 Hz), 143.53, 138.55, 132.71, 130.67, 129.31, 128.72, 128.40, 126.92, 126.09, 121.82, 121.48, 121.28, 36.82 (d,  $J$  = 44.5 Hz), 34.68 (d,  $J$  = 58.4 Hz), 26.92, 21.47. HRMS calcd for  $\text{C}_{23}\text{H}_{30}\text{NOP}$ :  $[\text{M}+\text{H}]^+$  368.2138, found 368.2139.

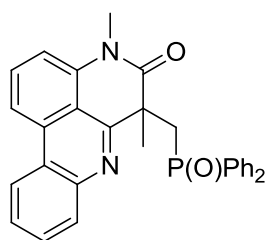

**6-((diphenylphosphoryl)methyl)-4,6-dimethyl-4H-pyrido[4,3,2-gh]phenanthridin-5(6H)-one (5a):** 68 mg, Yield: 71 %, white solid (M.P. = 233-235 °C),  $^1\text{H}$  NMR (400 MHz,  $\text{CDCl}_3$ )  $\delta$  8.36-8.33 (1H, m), 8.12 (1H, dd,  $J$  = 8.3 Hz,  $J$  = 4.7 Hz), 7.67-7.79 (3H, m), 7.49-7.54 (3H, m), 7.34-7.41 (3H, m), 7.10-7.22 (3H, m), 6.91-6.96 (1H, m), 6.82-6.87 (2H, m), 3.72 (2H, ddd,  $J$  = 40.8 Hz,  $J$  = 14.2 Hz,  $J$  = 14.2 Hz), 3.61 (3H, s), 1.88 (3H, d,  $J$  = 2.3 Hz);  $^{31}\text{P}$  NMR (162 MHz,  $\text{CDCl}_3$ )  $\delta$  28.08;  $^{13}\text{C}$  NMR (100 MHz,  $\text{CDCl}_3$ )  $\delta$  173.22, 158.06 (d,  $J$  = 1.9 Hz), 143.84, 139.05, 134.82 (d,  $J$  = 98.9 Hz), 133.08 (d,  $J$  = 98.9 Hz), 133.00, 131.66, 131.20 (d,  $J$  = 2.6 Hz), 130.48 (d,  $J$  = 9.5 Hz), 130.05 (d,  $J$  = 9.5 Hz), 129.95 (d,  $J$  = 2.6 Hz), 129.12, 128.22, 128.21 (d,  $J$  = 11.7 Hz), 127.19 (d,  $J$  = 11.7 Hz), 126.19, 122.77, 122.13, 115.45, 111.88, 110.75, 48.43 (d,  $J$  = 4.2 Hz), 40.94 (d,  $J$  = 70.2 Hz), 32.03 (d,  $J$  = 14.3 Hz), 29.95. HRMS calcd for  $\text{C}_{30}\text{H}_{25}\text{N}_2\text{O}_2\text{P}$ :  $[\text{M}+\text{H}]^+$  477.1726, found 477.1728.

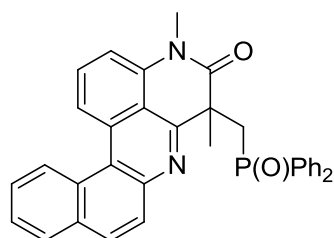

**6-((diphenylphosphoryl)methyl)-4,6-dimethyl-4H-benzo[a]pyrido[4,3,2-gh]phenanthridin-5(6H)-one (5b):** 62 mg, Yield: 57 %, white solid (M.P. = 199-200 °C),  $^1\text{H}$  NMR (400 MHz,  $\text{CDCl}_3$ )  $\delta$  8.96 (1H, d,  $J$  = 8.4 Hz), 8.61 (1H, d,  $J$  = 8.7 Hz), 7.97 (1H, d,  $J$  = 7.6 Hz), 7.83 (1H, d,  $J$  = 8.8 Hz), 7.80 (1H, t,  $J$  = 8.3 Hz), 7.66-7.72 (3H, m), 7.62 (1H, d,  $J$  = 7.0 Hz), 7.43 (1H, d,  $J$  = 8.8 Hz), 7.34-7.42 (3H, m), 7.24 (1H, d,  $J$  = 7.9 Hz), 7.06-7.12 (2H, m), 6.65-6.74 (3H, m), 3.70-3.78 (2H, m), 3.67 (3H, s), 1.88 (3H, d,  $J$  = 2.3 Hz);  $^{31}\text{P}$  NMR (162 MHz,  $\text{CDCl}_3$ )  $\delta$  27.82;  $^{13}\text{C}$  NMR (100 MHz,  $\text{CDCl}_3$ )  $\delta$  173.23 (d,  $J$  = 1.6 Hz), 157.22, 143.89, 138.93, 134.86 (d,  $J$  = 99.0 Hz), 132.98, 132.93, 132.68 (d,  $J$  = 98.8 Hz), 131.36, 131.31 (d,  $J$  = 2.5 Hz), 130.48 (d,  $J$  = 9.5 Hz), 130.03 (d,  $J$  = 9.6 Hz), 129.87 (d,  $J$  = 2.8 Hz), 129.70, 129.22, 128.50, 128.31 (d,  $J$  = 11.7 Hz), 127.75, 127.48, 127.25 (d,  $J$  = 11.8 Hz), 126.31, 126.00, 120.30, 119.41, 113.32, 110.03, 48.43 (d,  $J$  = 4.2 Hz), 40.94 (d,  $J$  = 70.2 Hz), 32.06 (d,  $J$  = 14.4 Hz), 30.15; HRMS calcd for  $\text{C}_{34}\text{H}_{27}\text{N}_2\text{O}_2\text{P}$ :  $[\text{M}+\text{H}]^+$  527.1883, found 527.1884.

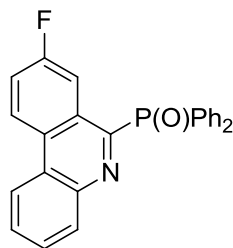

**6-(diphenylphosphoryl)-8-fluorophenanthridine(7a):** 57 mg, Yield: 72 %, white solid,  $^1\text{H}$  NMR (400 MHz,  $\text{CDCl}_3$ )  $\delta$  9.33 (dd, 1H,  $J = 2.6$  Hz,  $J = 10.2$  Hz), 8.62-8.59 (m, 1H), 8.50-8.48 (m, 1H), 8.07-8.05 (m, 1H), 7.98-7.93 (m, 4H), 7.73-7.66 (m, 2H), 7.59-7.43 (m, 7H);  $^{31}\text{P}$  NMR (162 MHz,  $\text{CDCl}_3$ )  $\delta$  27.44;  $^{19}\text{F}$  NMR (376 MHz,  $\text{CDCl}_3$ )  $\delta$  -109.58;  $^{13}\text{C}$  NMR (100 MHz,  $\text{CDCl}_3$ )  $\delta$  161.2 (d,  $J = 247.8$  Hz), 155.8 (dd,  $J = 4.3$  Hz,  $J = 127.7$  Hz), 142.3 (d,  $J = 22.6$  Hz), 132.6 (d,  $J = 104.3$  Hz), 132.2 (d,  $J = 9.0$  Hz), 131.8 (d,  $J = 2.7$  Hz), 131.1, 128.8 (d,  $J = 62.7$  Hz), 128.2 (d,  $J = 12.2$  Hz), 124.5 (d,  $J = 8.7$  Hz), 123.8, 121.8, 120.4 (d,  $J = 24.3$  Hz), 113.1 (d,  $J = 23.1$  Hz); HRMS calcd for  $\text{C}_{25}\text{H}_{17}\text{FNOP}$   $[\text{M}+\text{H}]^+$  398.1105, found 398.1103.

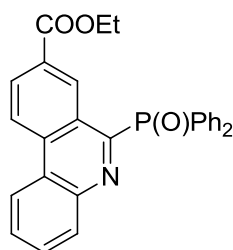

**ethyl 6-(diphenylphosphoryl)phenanthridine-8-carboxylate(7b):** 46 mg, Yield: 51 %, white solid,  $^1\text{H}$  NMR (400 MHz,  $\text{CDCl}_3$ )  $\delta$  10.20 (d, 1H,  $J = 1.2$  Hz), 8.67-8.65 (m, 1H), 8.59-8.57 (m, 1H), 8.45-8.42 (m, 1H), 8.09-8.07 (m, 1H), 8.02-7.97 (m, 4H), 7.77-7.72 (m, 2H), 7.55-7.44 (m, 6H), 4.43 (q, 2H,  $J = 7.1$  Hz), 1.43 (t, 3H,  $J = 7.1$  Hz);  $^{31}\text{P}$  NMR (162 MHz,  $\text{CDCl}_3$ )  $\delta$  27.12;  $^{13}\text{C}$  NMR (100 MHz,  $\text{CDCl}_3$ )  $\delta$  165.9, 157.6 (d,  $J = 126.5$  Hz), 143.3 (d,  $J = 22.6$  Hz), 135.3 (d,  $J = 6.6$  Hz), 132.6 (d,  $J = 104.3$  Hz), 132.2 (d,  $J = 9.2$  Hz), 131.7 (d,  $J = 2.6$  Hz), 131.1, 130.8, 130.5, 129.7, 129.5, 129.1, 128.2 (d,  $J = 12.0$  Hz), 127.0 (d,  $J = 22.8$  Hz), 123.6 (d,  $J = 2.2$  Hz), 122.5 (d,  $J = 19.3$  Hz), 61.3, 14.3; HRMS calcd for  $\text{C}_{28}\text{H}_{22}\text{NO}_3\text{P}$   $[\text{M}+\text{H}]^+$  452.1410, found 452.1409.

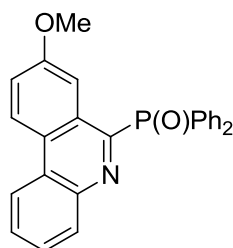

**6-(diphenylphosphoryl)-8-methoxyphenanthridine(7c):** 50 mg, Yield: 61 %, white solid,  $^1\text{H}$  NMR (400 MHz,  $\text{CDCl}_3$ )  $\delta$  9.02 (d, 1H,  $J = 2.6$  Hz), 8.55-8.48 (m, 2H), 8.05-8.03 (m, 1H), 7.99-7.94 (m, 4H), 7.70-7.62 (m, 2H), 7.54-7.43 (m, 7H), 3.94 (s, 3H);  $^{31}\text{P}$  NMR (162 MHz,  $\text{CDCl}_3$ )  $\delta$  27.60;  $^{13}\text{C}$  NMR (100 MHz,  $\text{CDCl}_3$ )  $\delta$  158.7, 155.4 (d,  $J = 128.4$  Hz), 142.0 (d,  $J = 23.1$  Hz), 132.9 (d,  $J = 104.0$  Hz), 132.2 (d,  $J = 9.2$  Hz), 131.6 (d,  $J = 2.7$  Hz), 131.0, 129.4 (d,  $J = 23.0$  Hz), 128.8, 128.1 (d,  $J = 12.1$  Hz), 127.6, 127.0 (d,  $J = 6.7$  Hz), 124.5 (d,  $J = 2.3$  Hz), 123.6, 122.6, 121.6, 107.4, 55.6; HRMS calcd for  $\text{C}_{26}\text{H}_{20}\text{NO}_2\text{P}$   $[\text{M}+\text{H}]^+$  410.1304, found 410.1299.



## 5. References

- [1] Keicher, T.; L bbecke, S. Lab-Scale Synthesis of Azido Compounds: Safety Measures and Analysis. In *Organic Azides: Syntheses and Applications*; Br se, S., Banert, K. Eds.; Wiley:Chichester, 2010; pp 3.
- [2] Smith, P. A. S. *The Chemistry of Open-Chain Organic Nitrogen Compounds*; Vol. 2; W.A.Benjamin Inc.: New York, 1966; pp 211.
- [3] (a) Hassner, A.; Fowler, F. W. *Tetrahedron Lett.* **1967**, 8, 1545. (b) Fowler, F. W.; Hassner, A.; Levy, L. A. *J. Am. Chem. Soc.* **1967**, 89, 2077.

## 6. Spectra

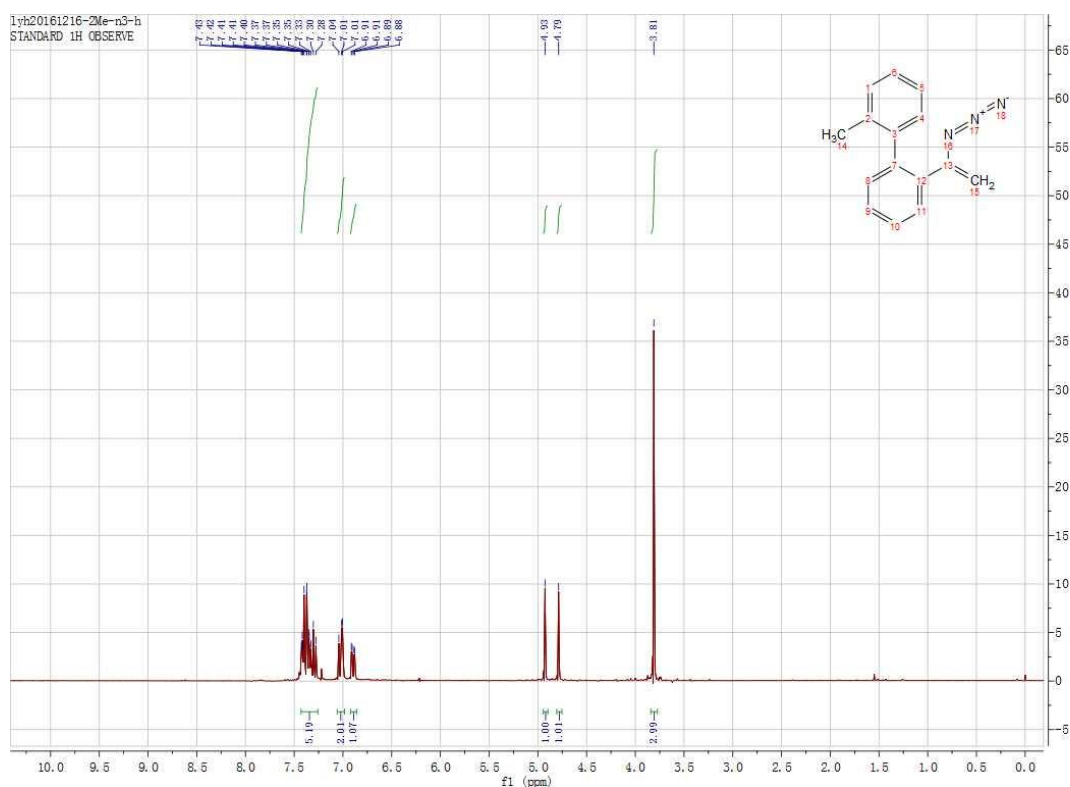

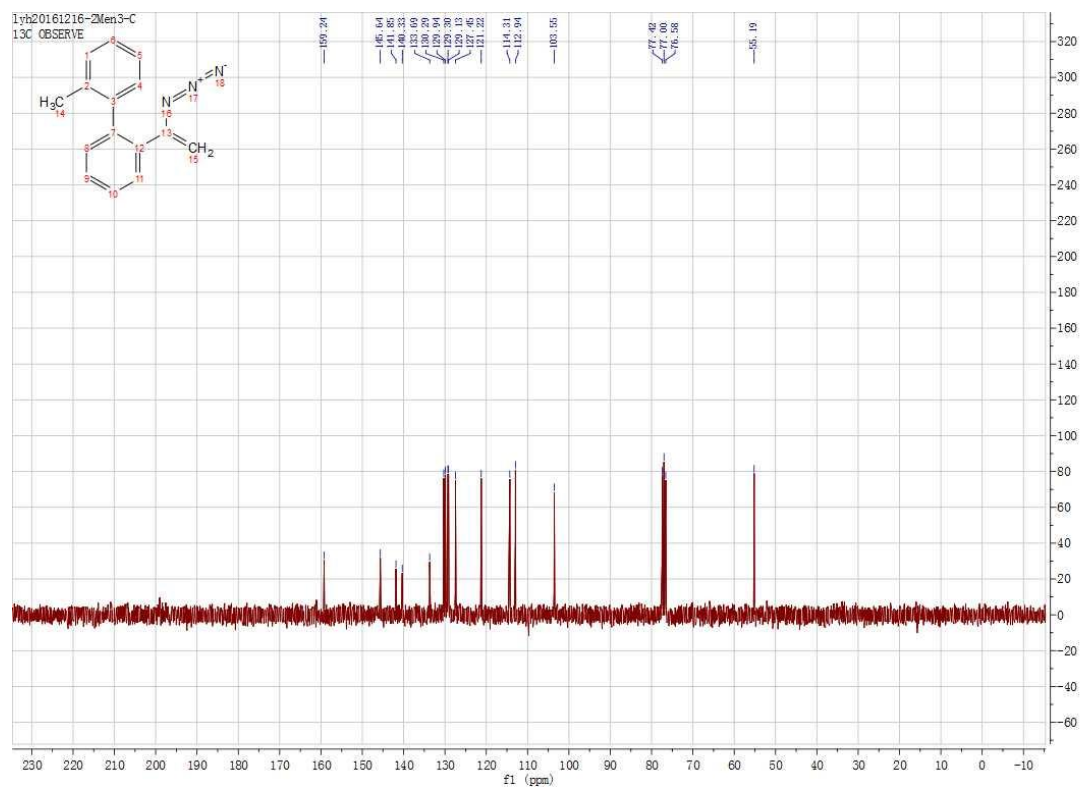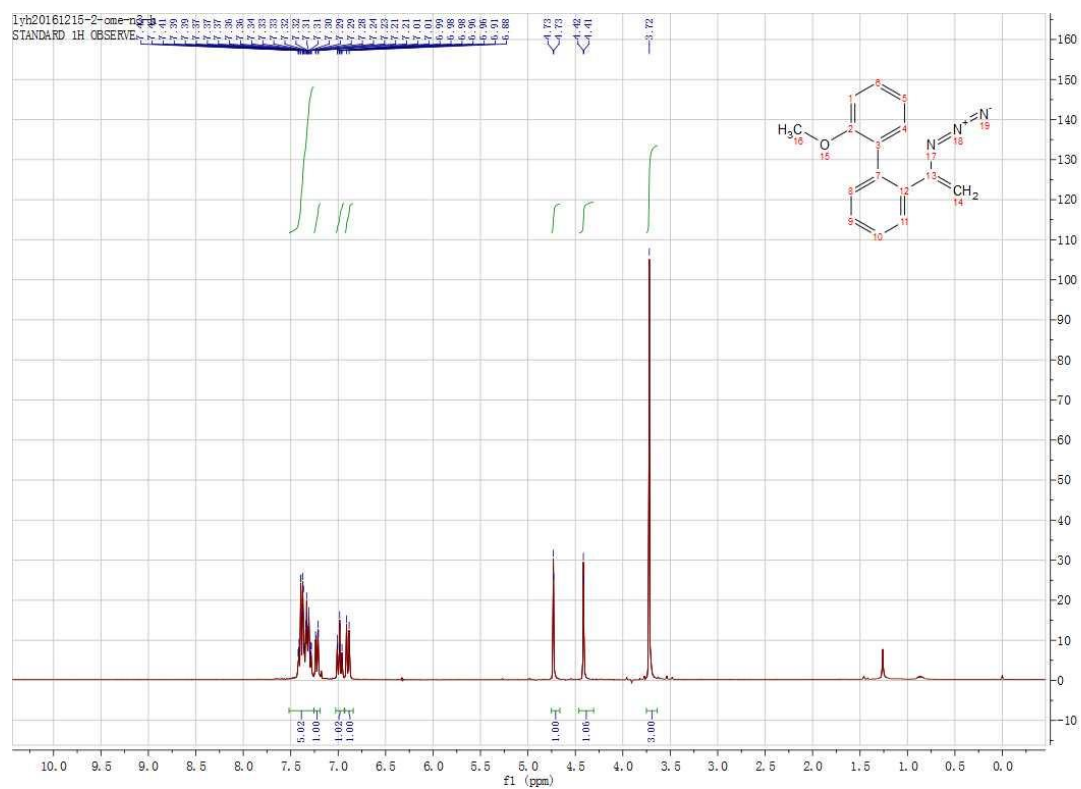

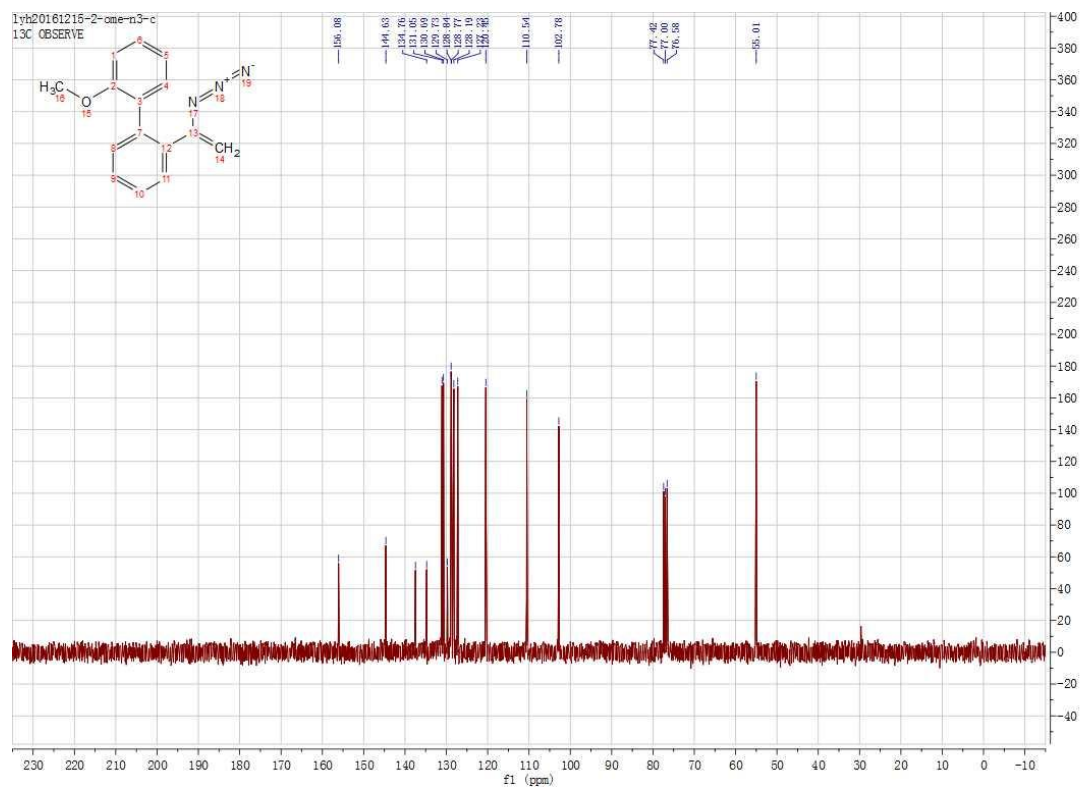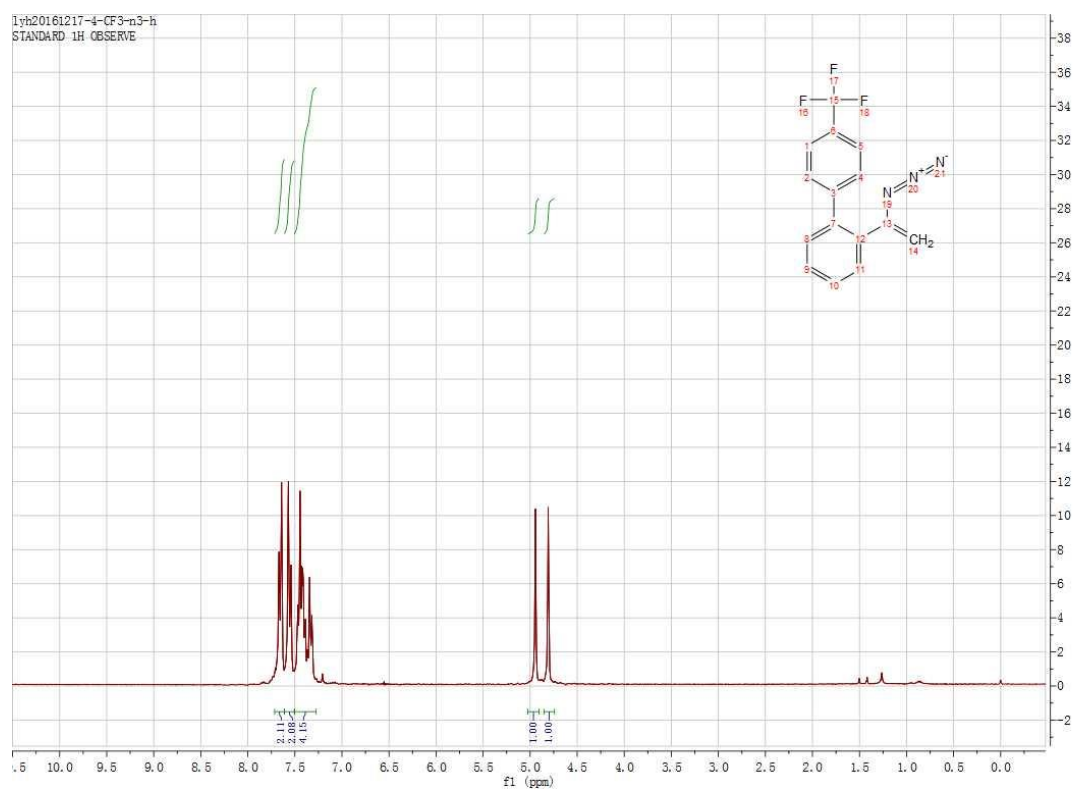

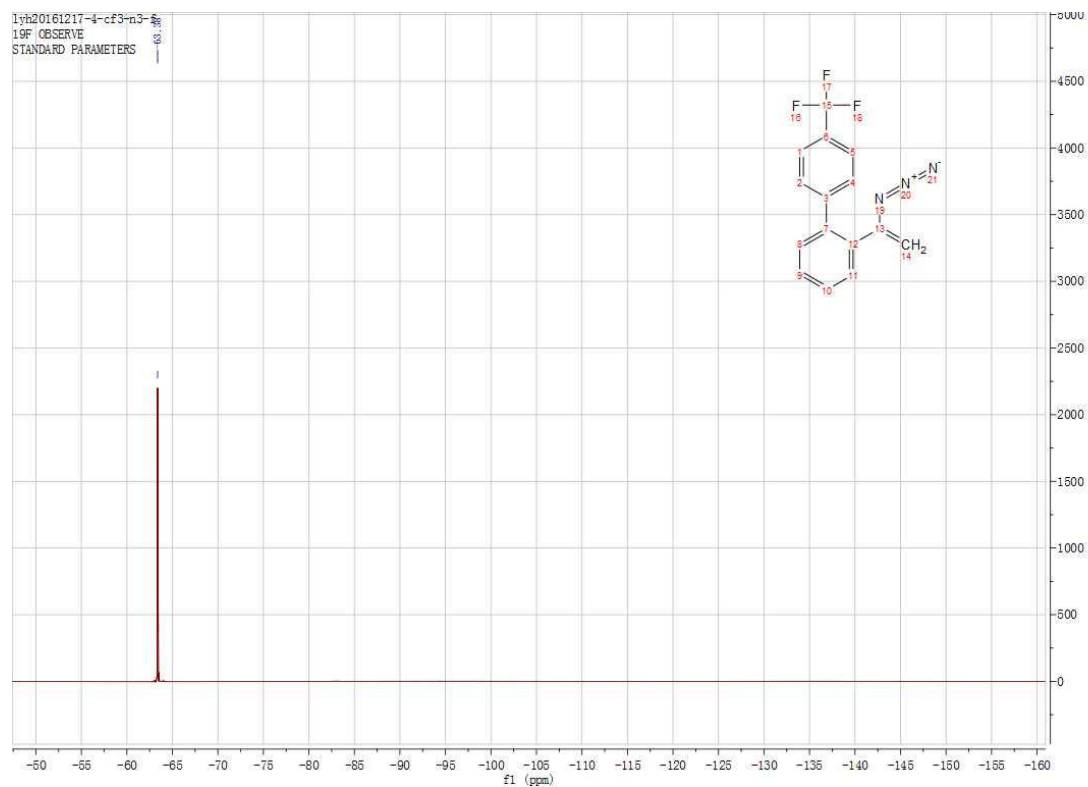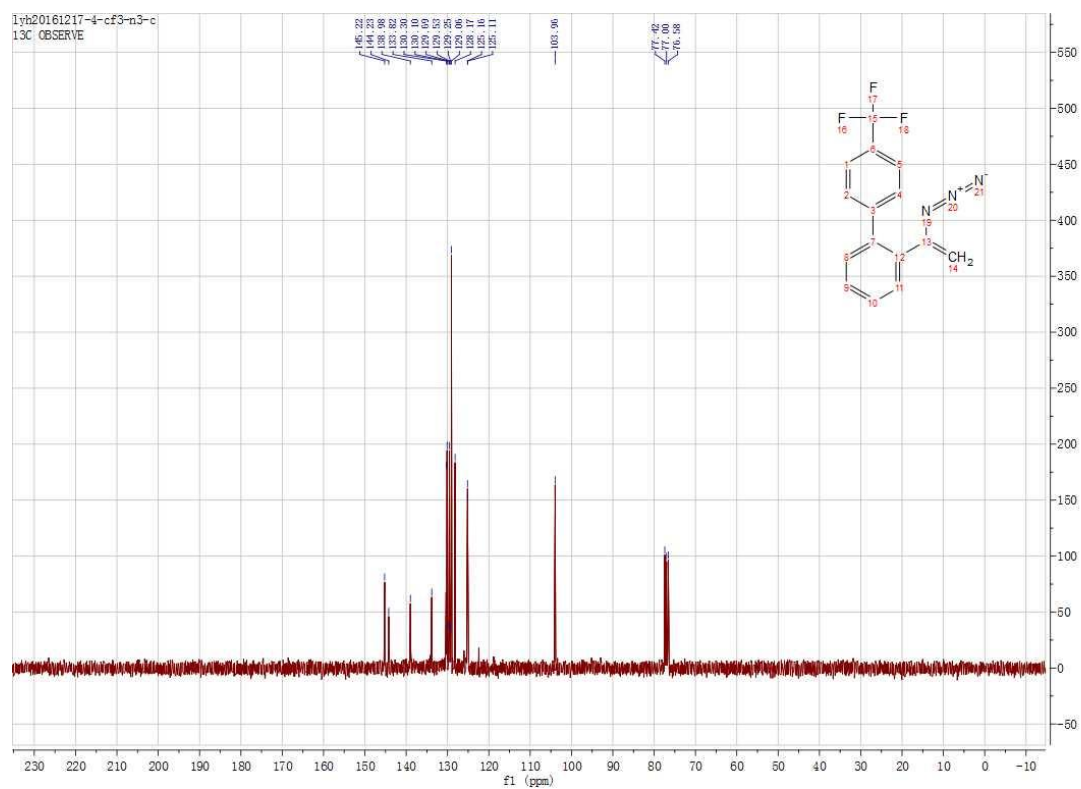

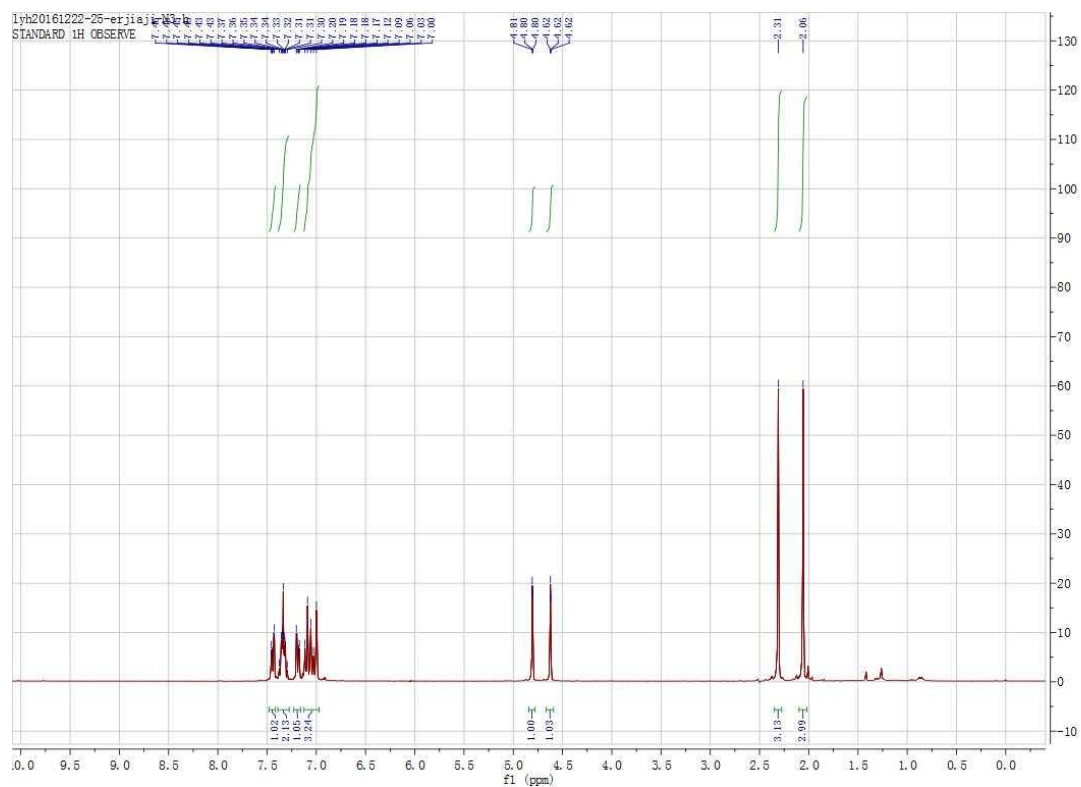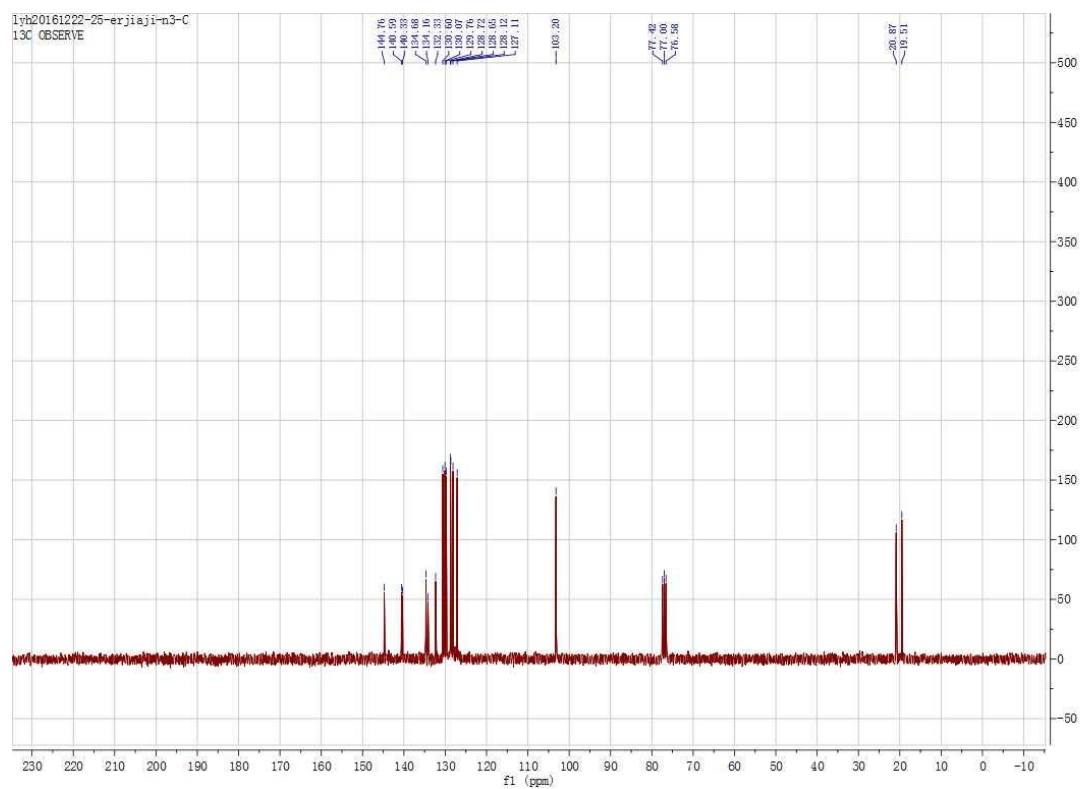

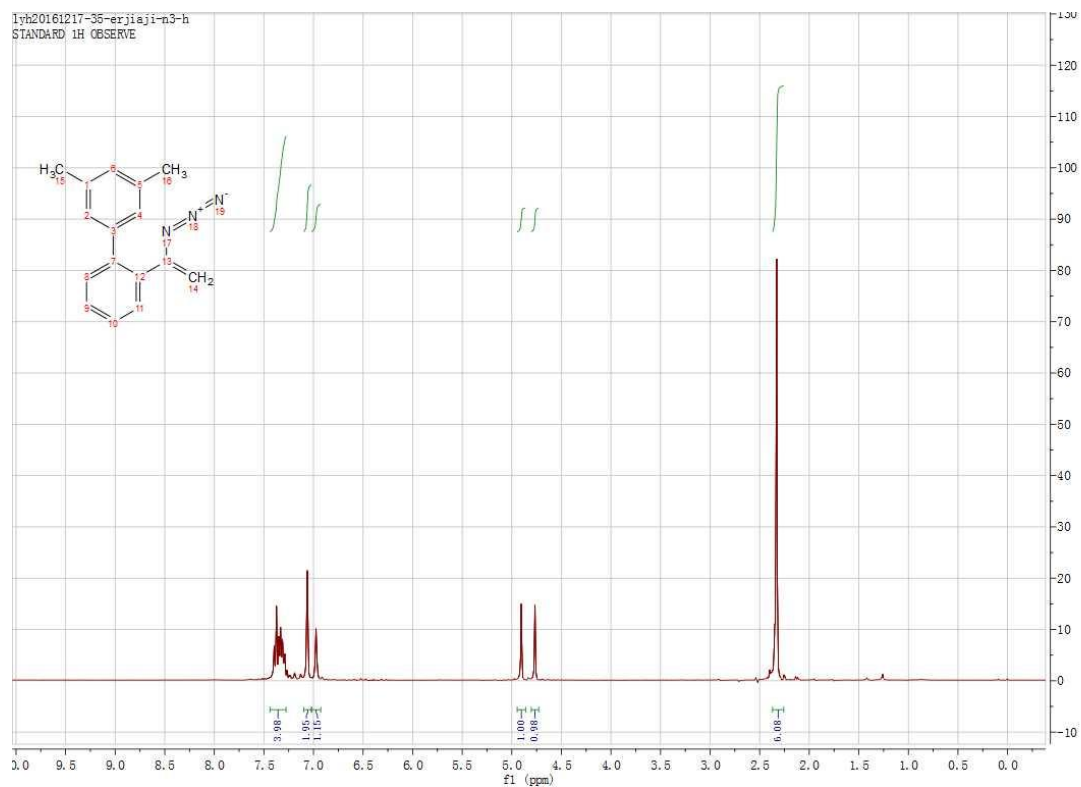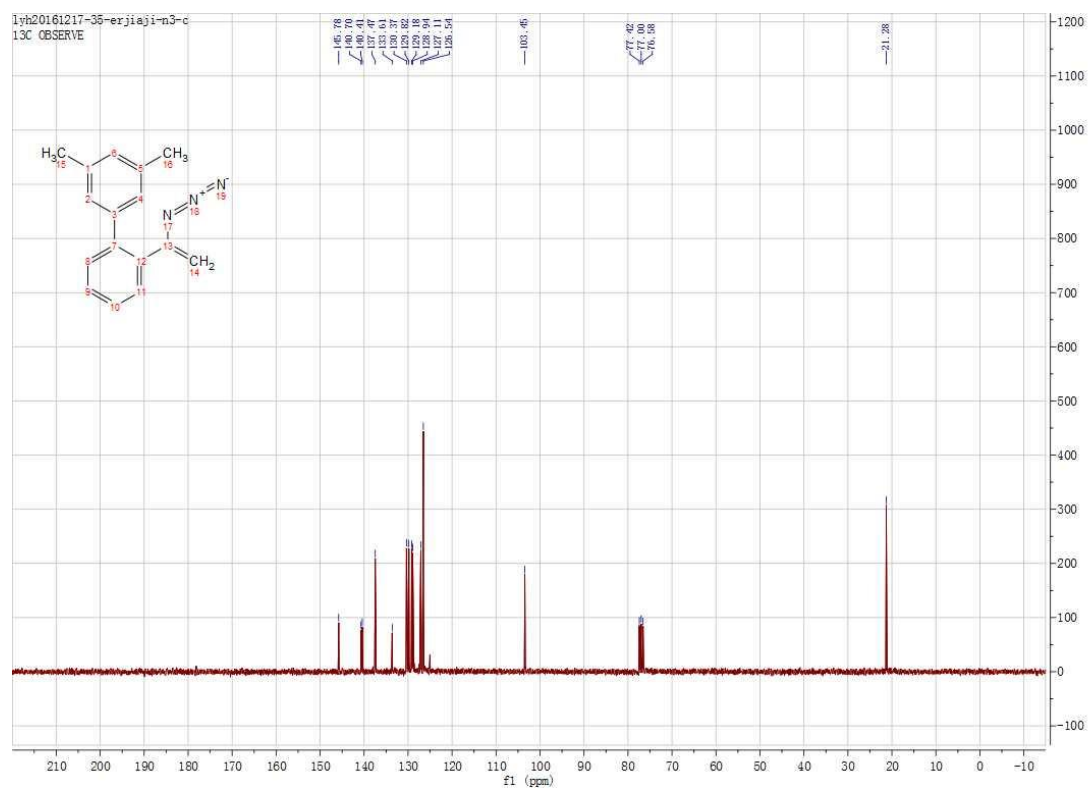

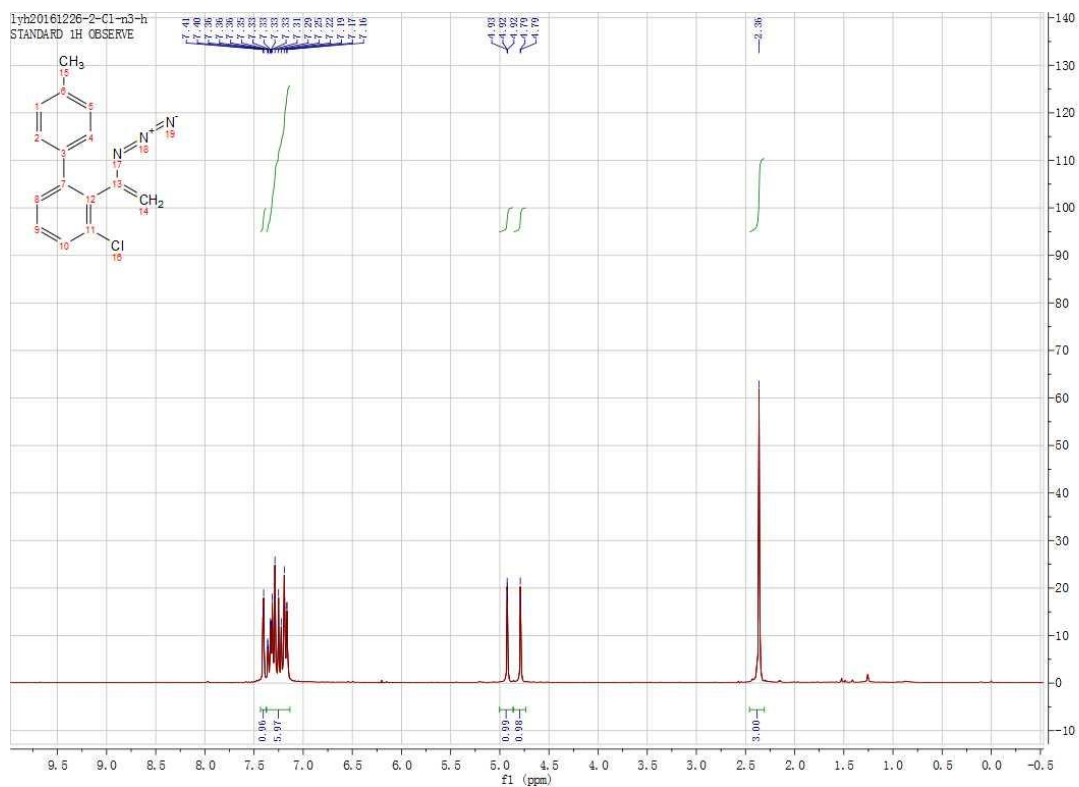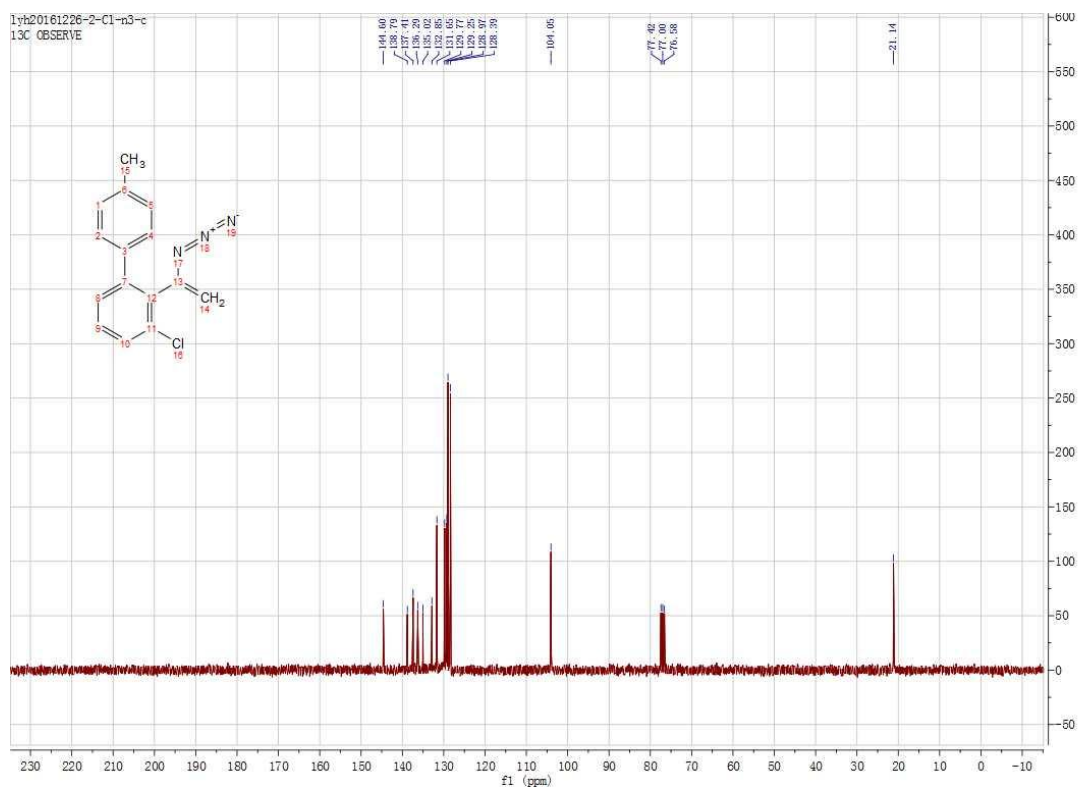

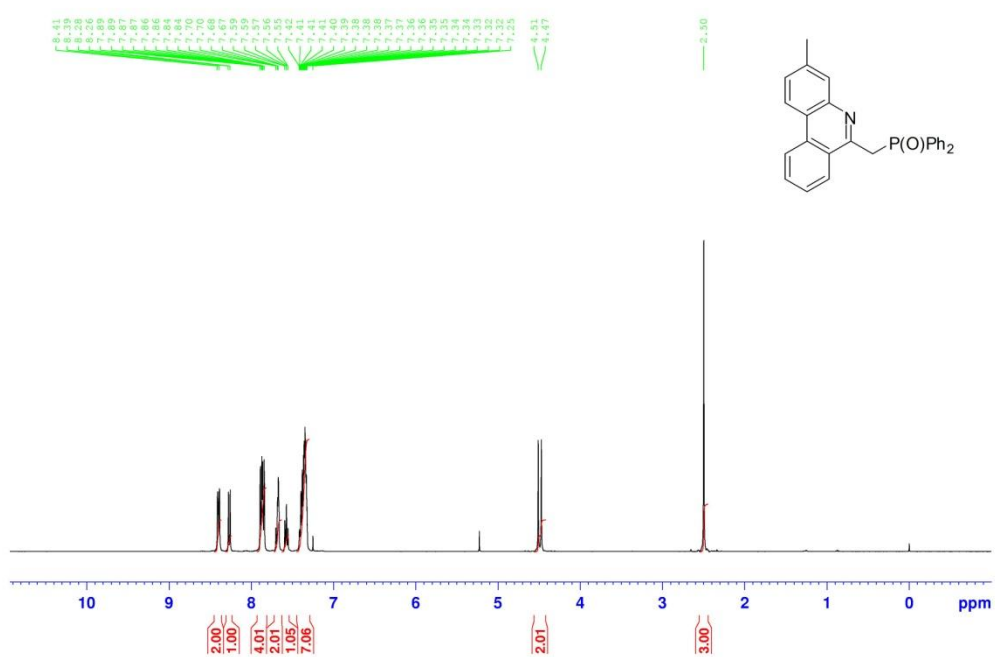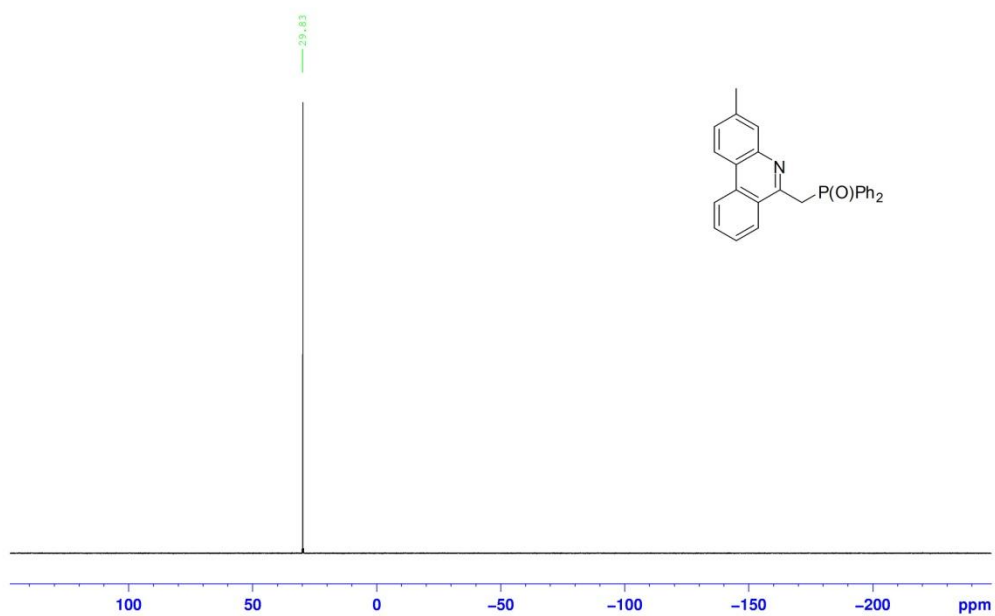



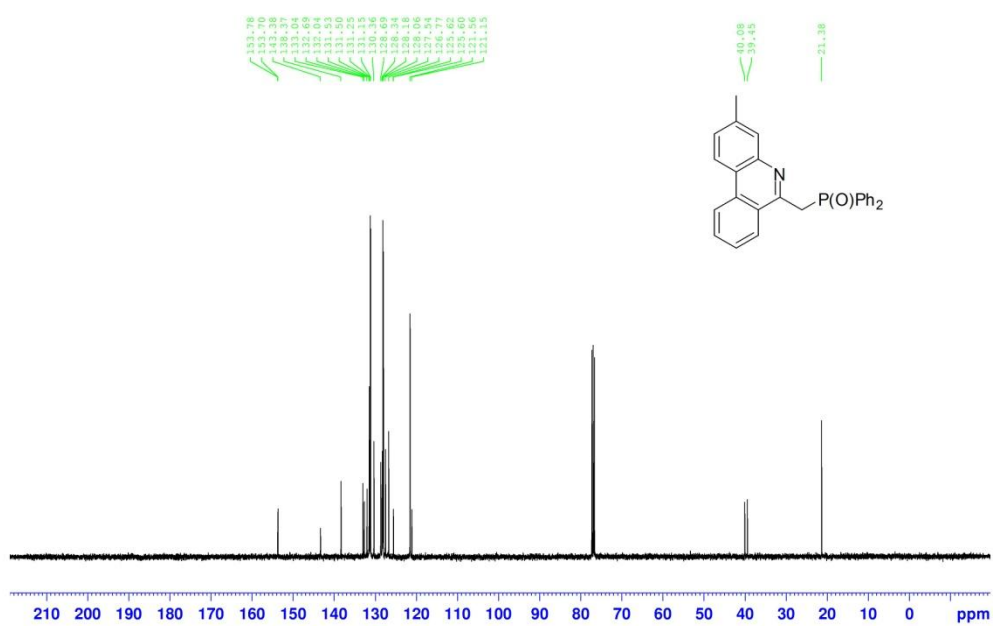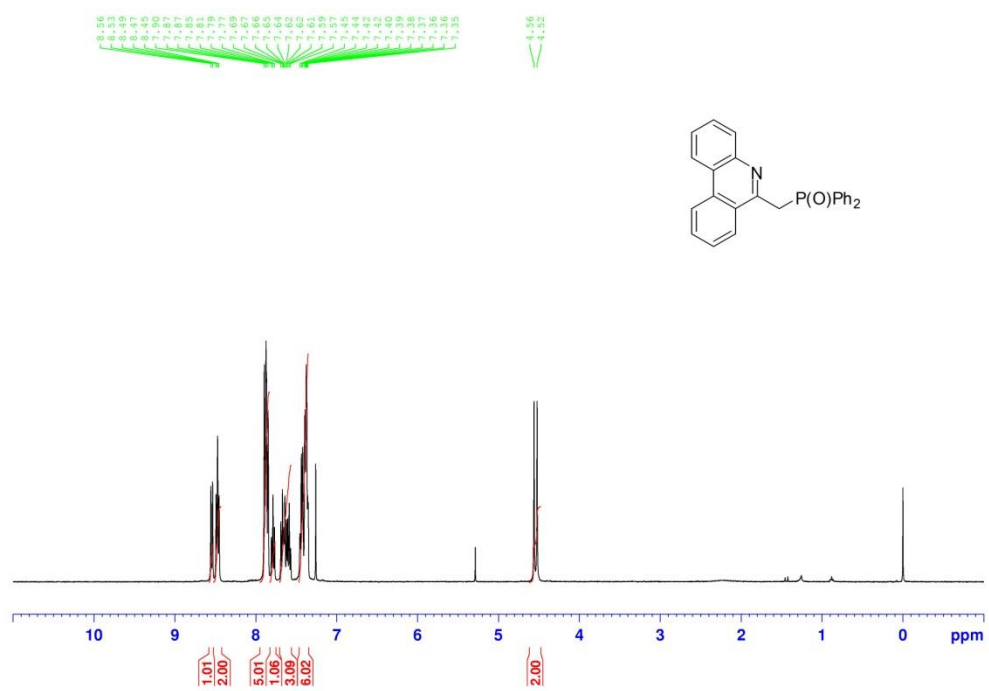

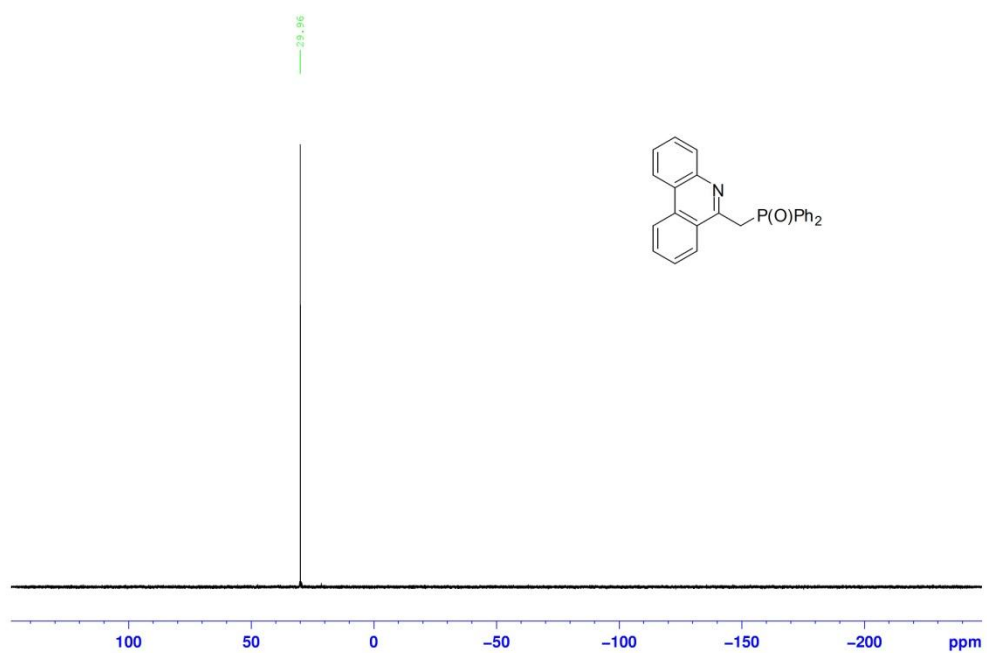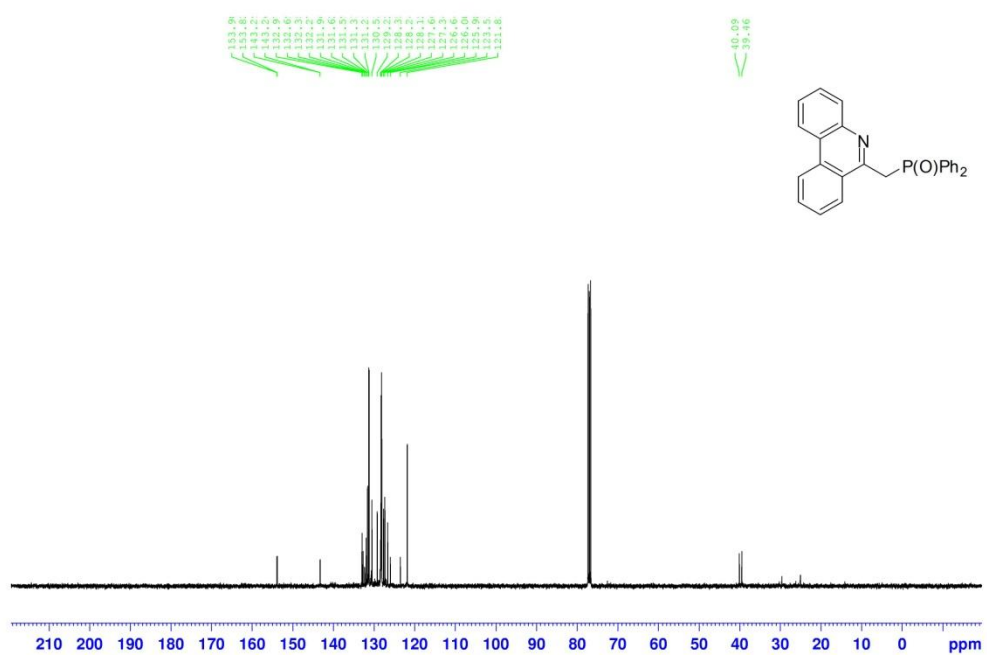

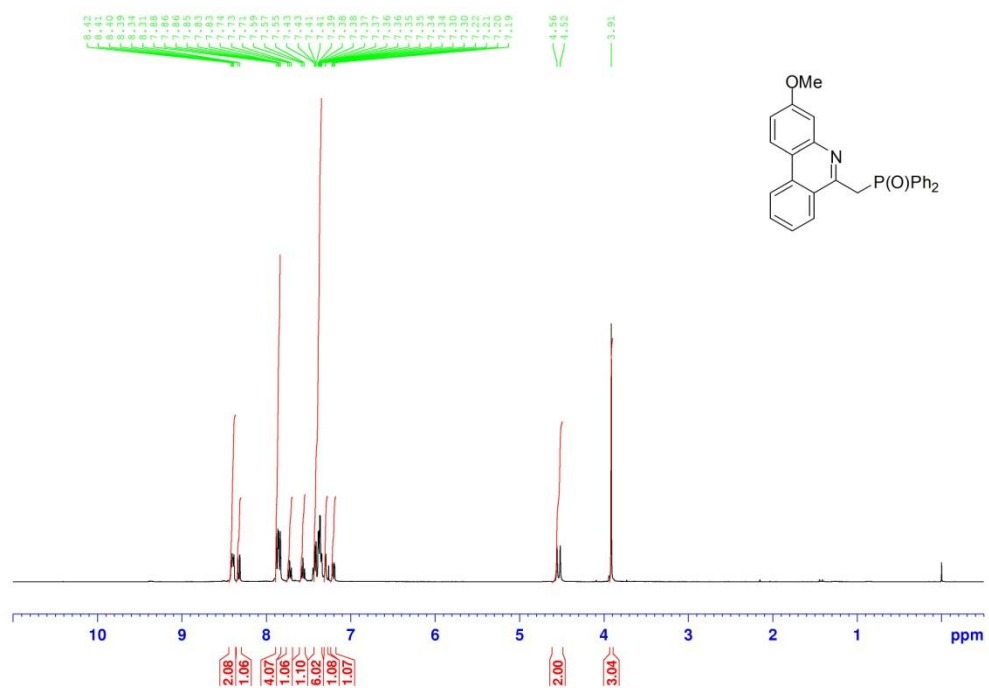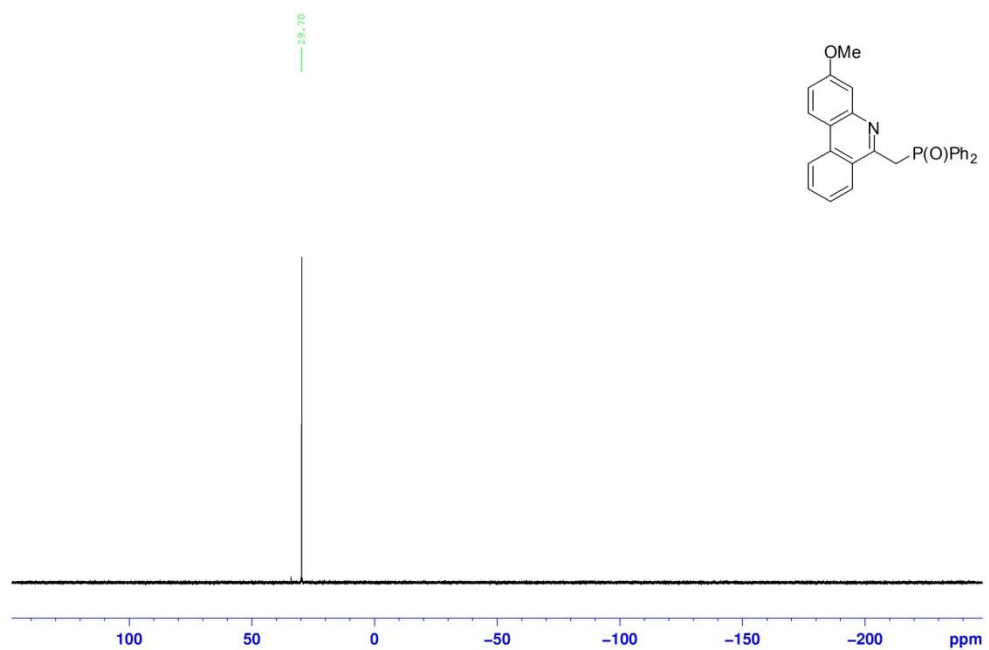

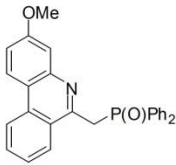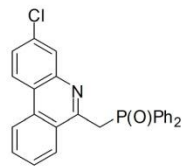



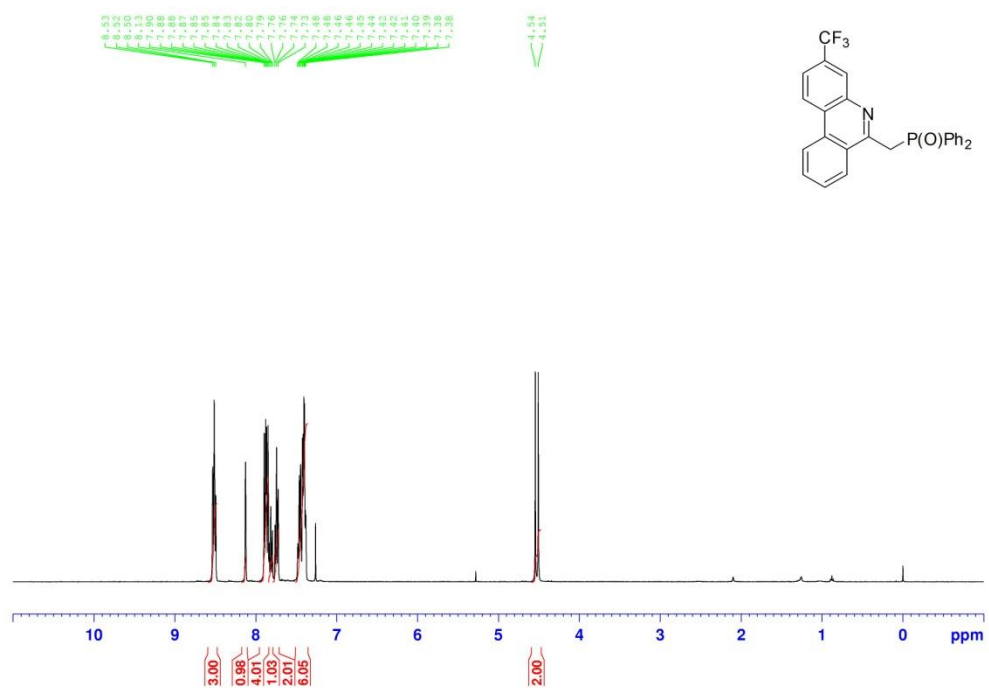

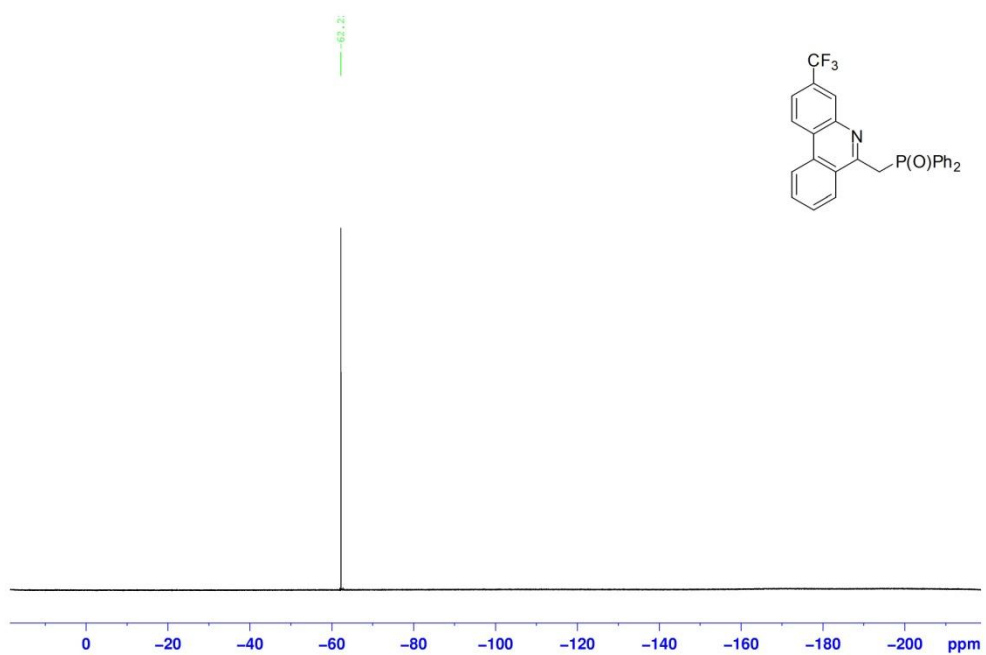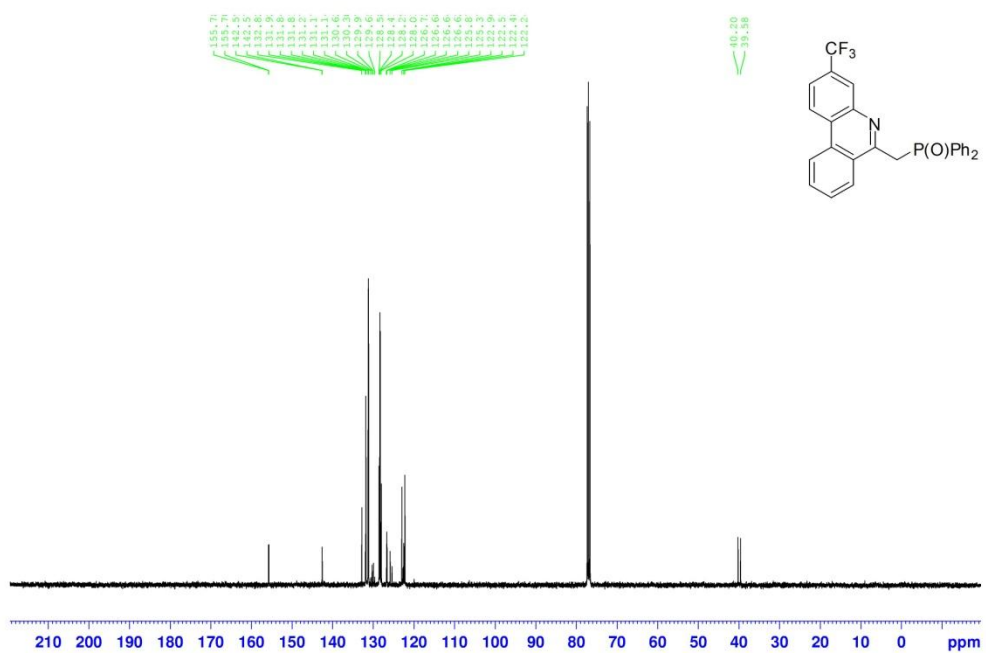





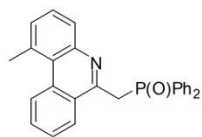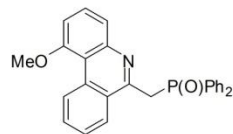

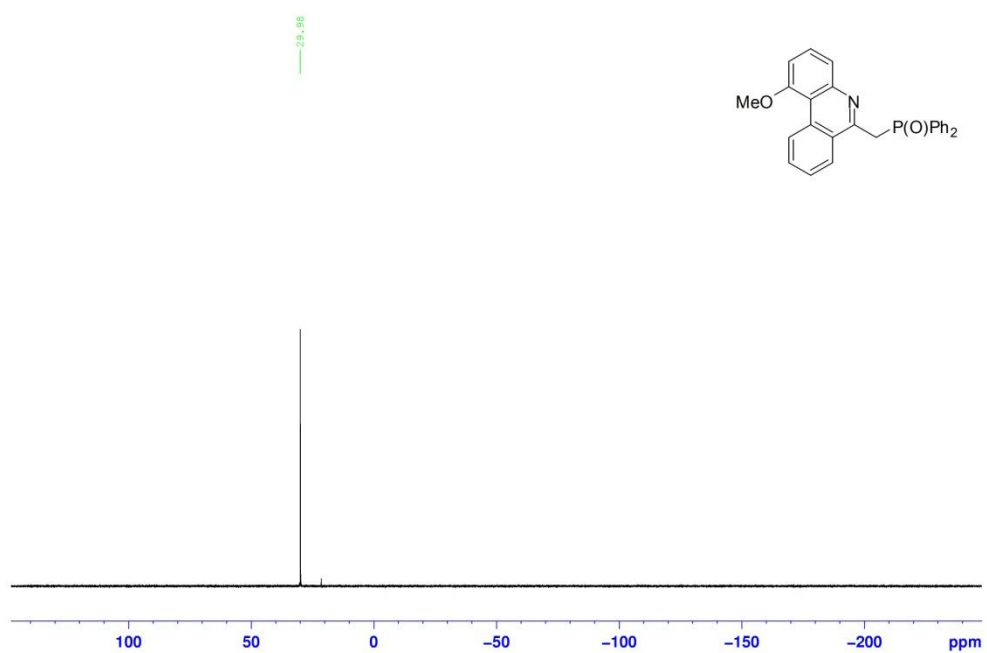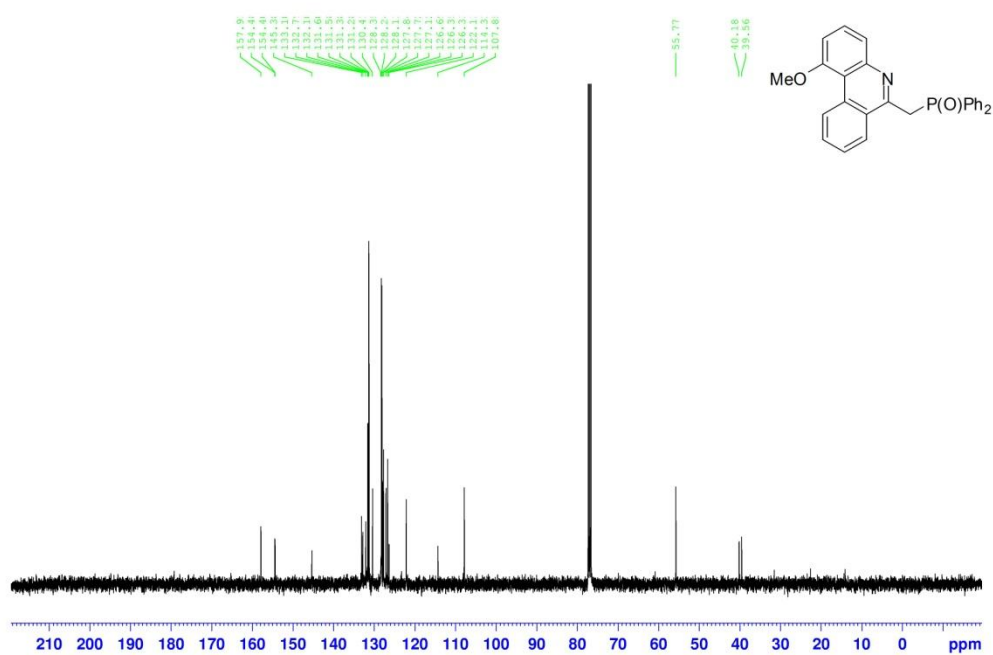

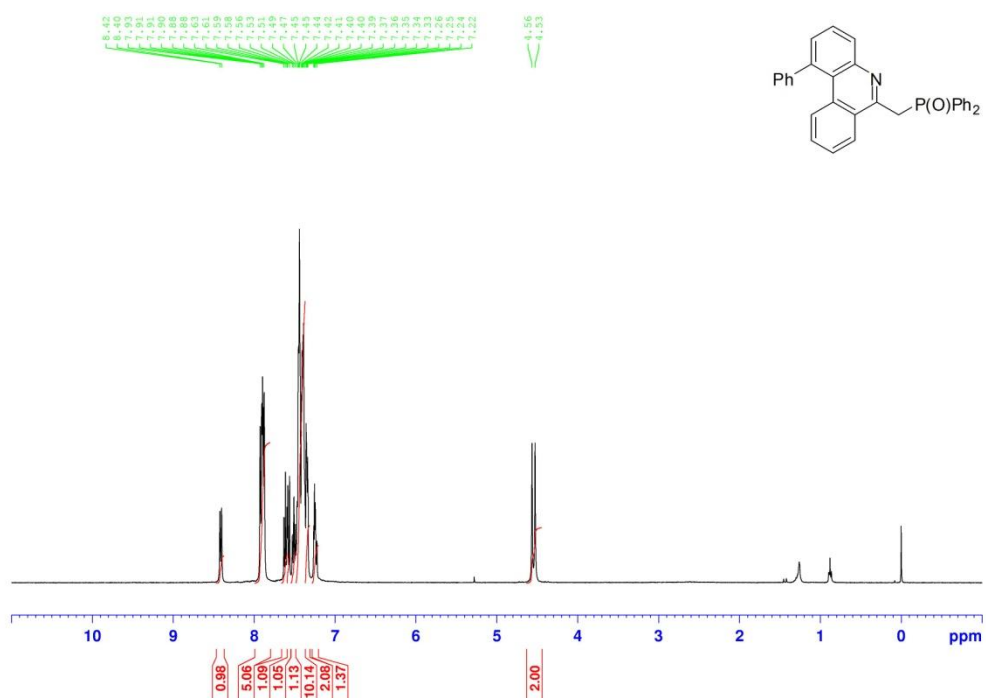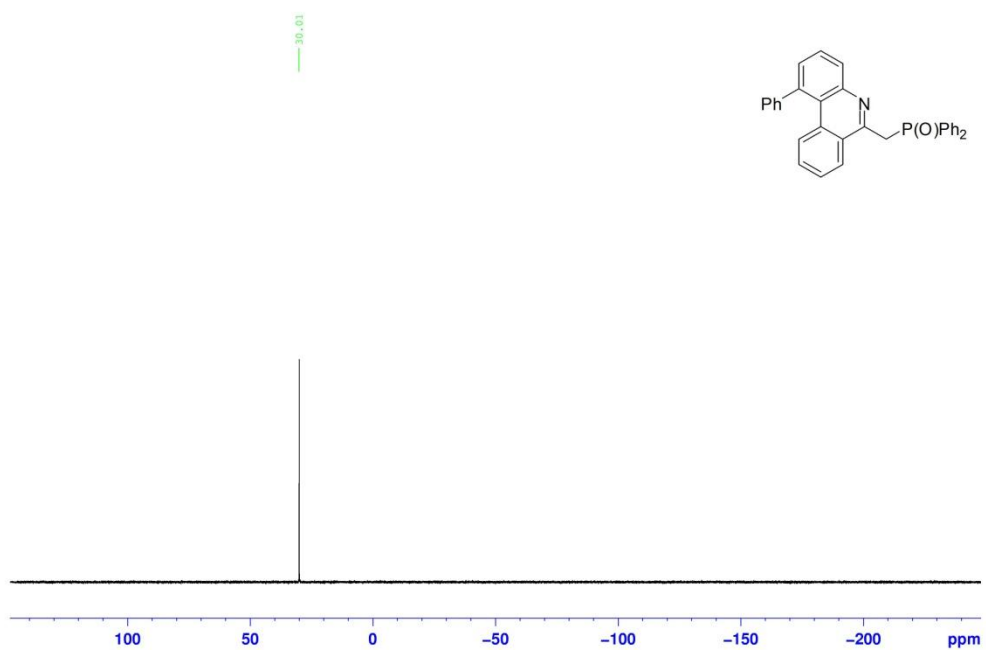

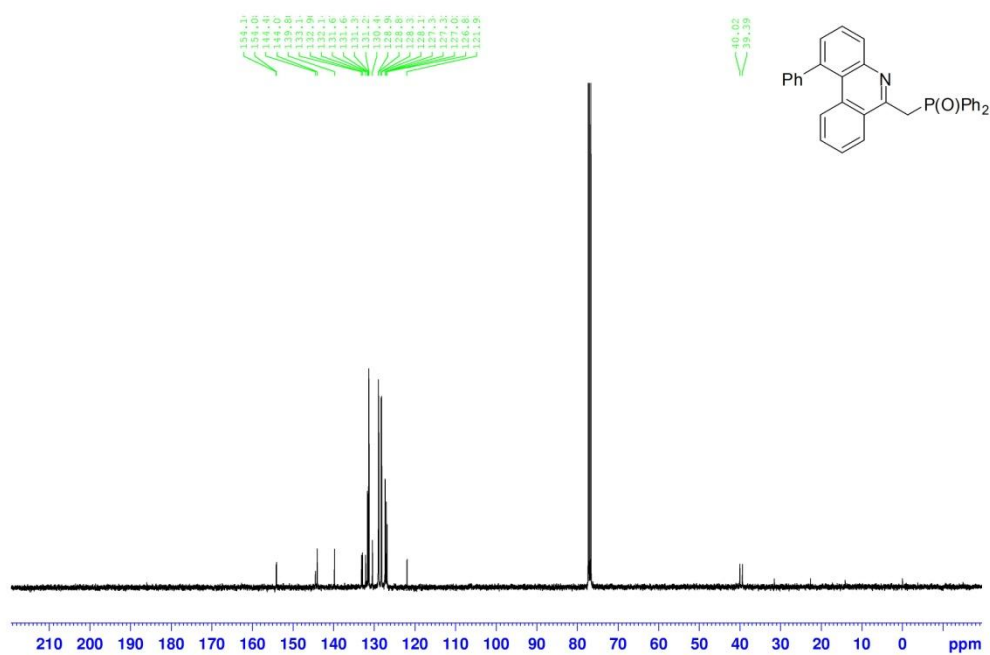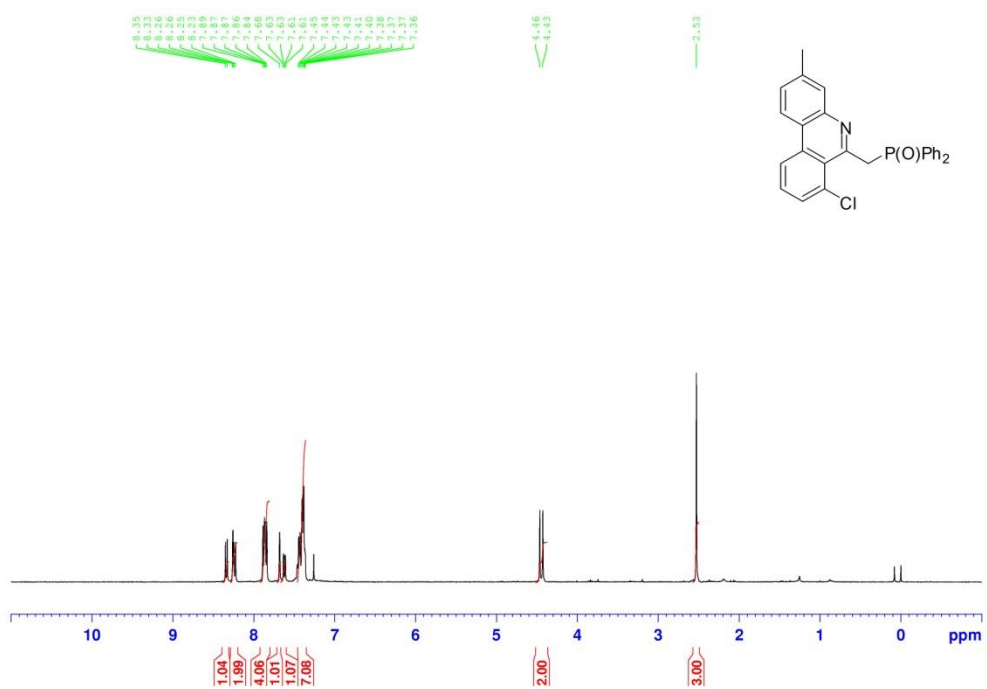

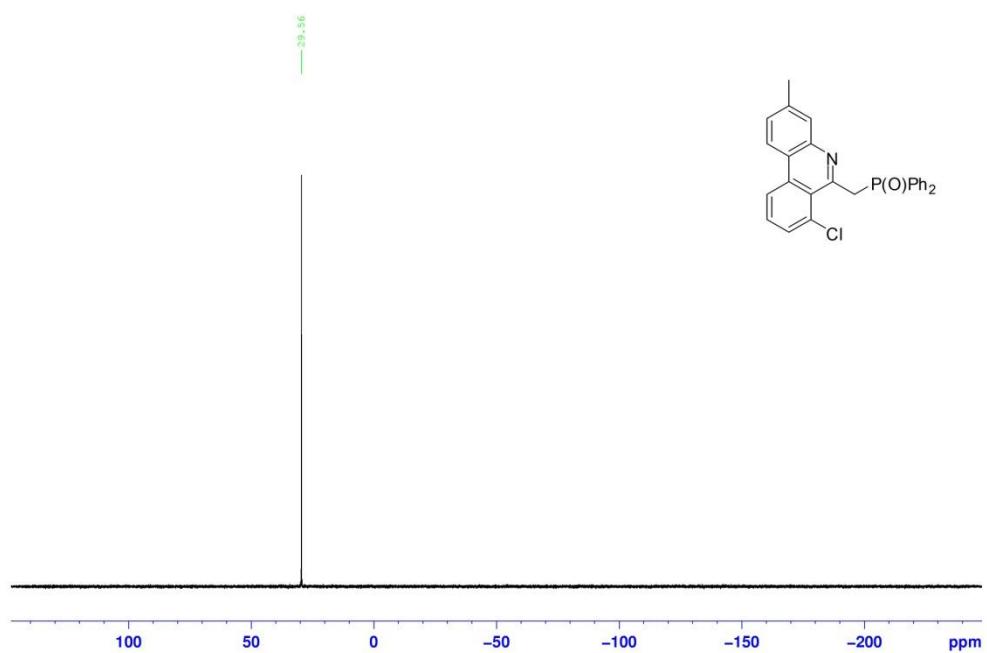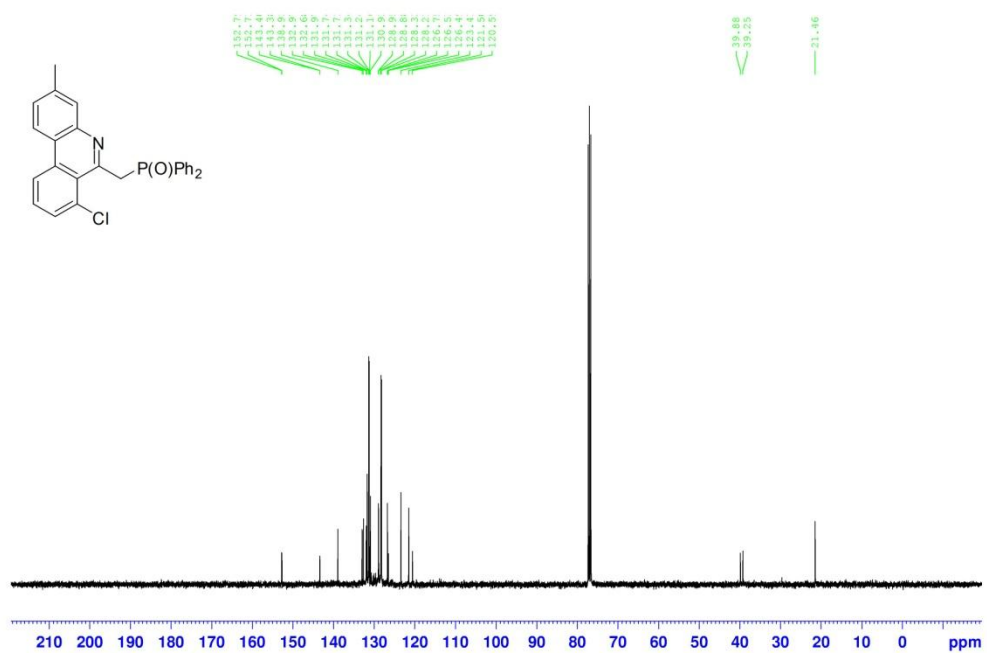

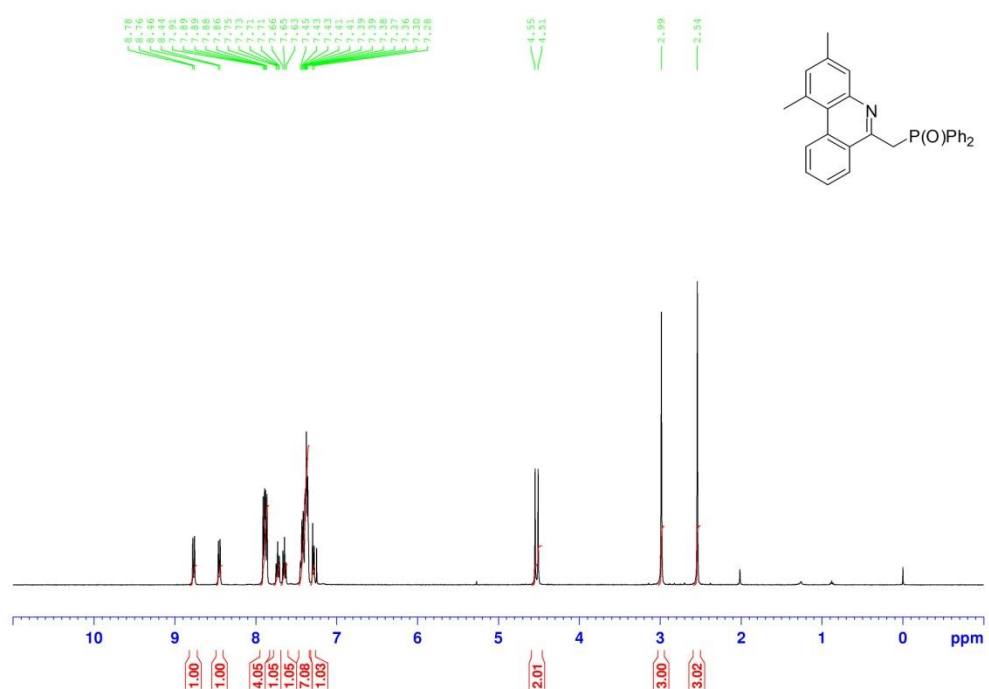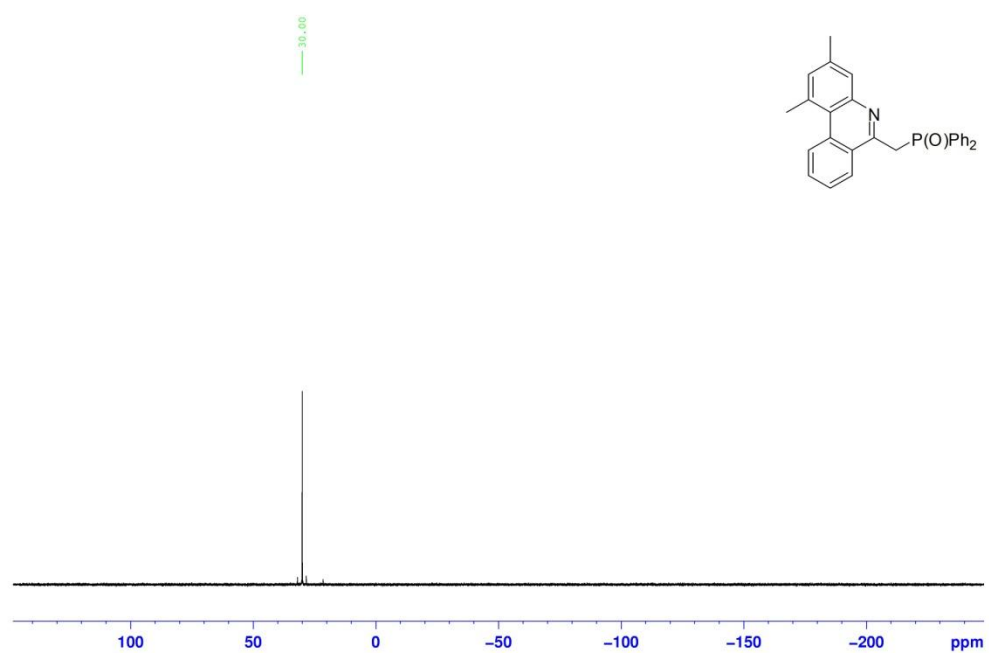

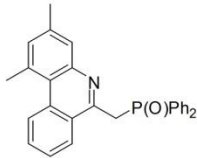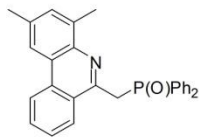

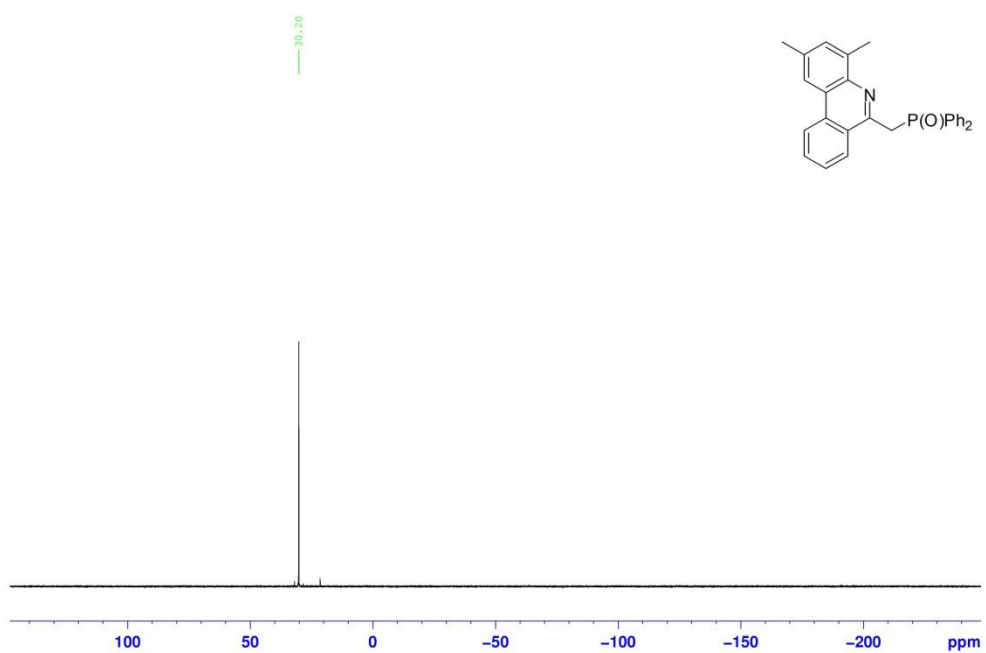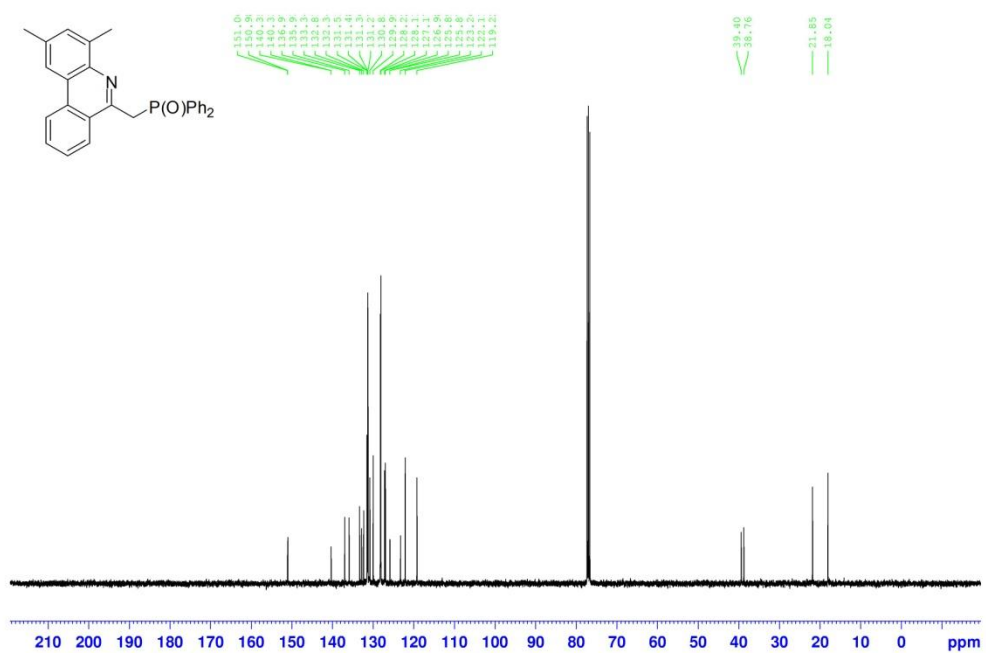



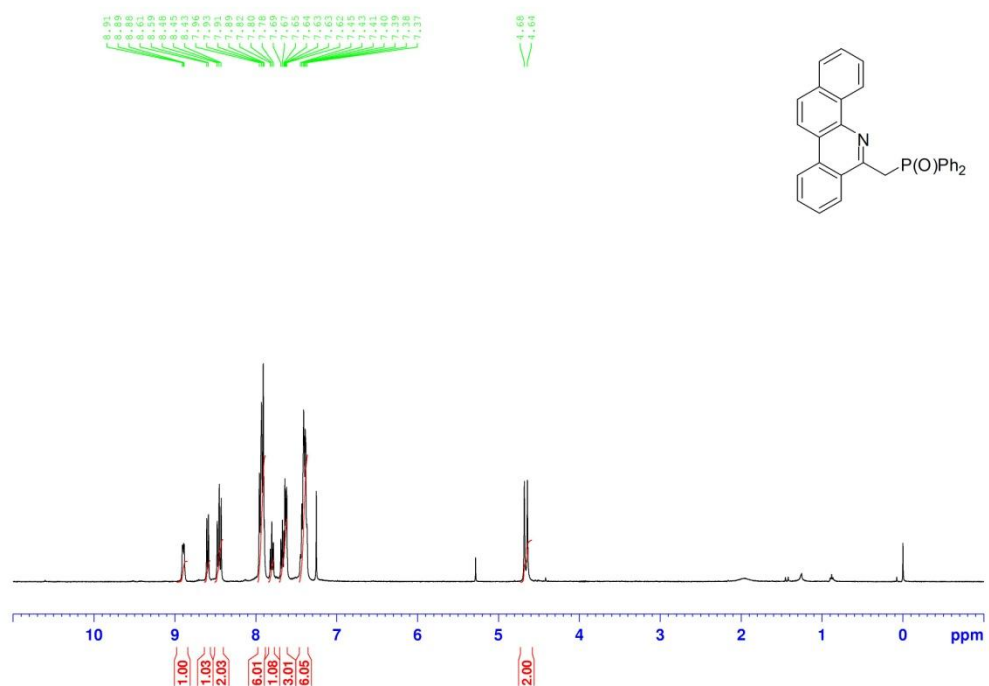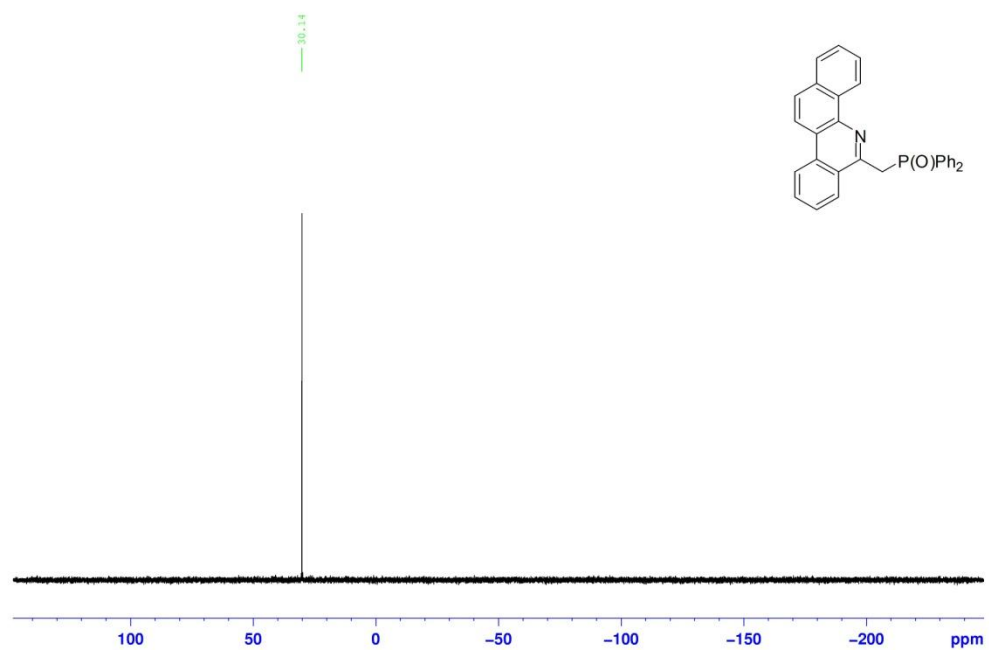

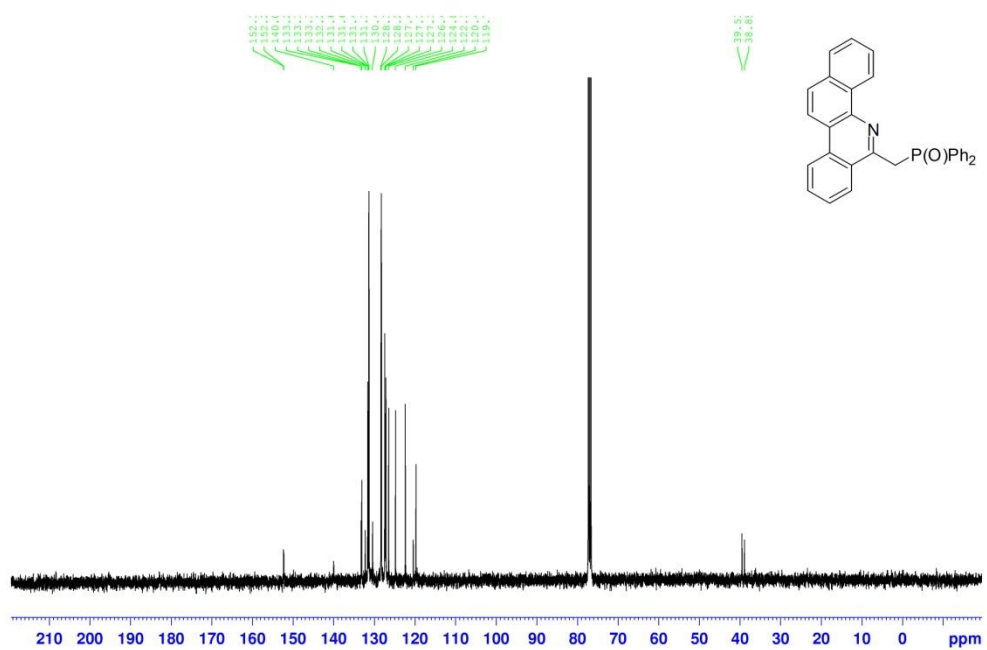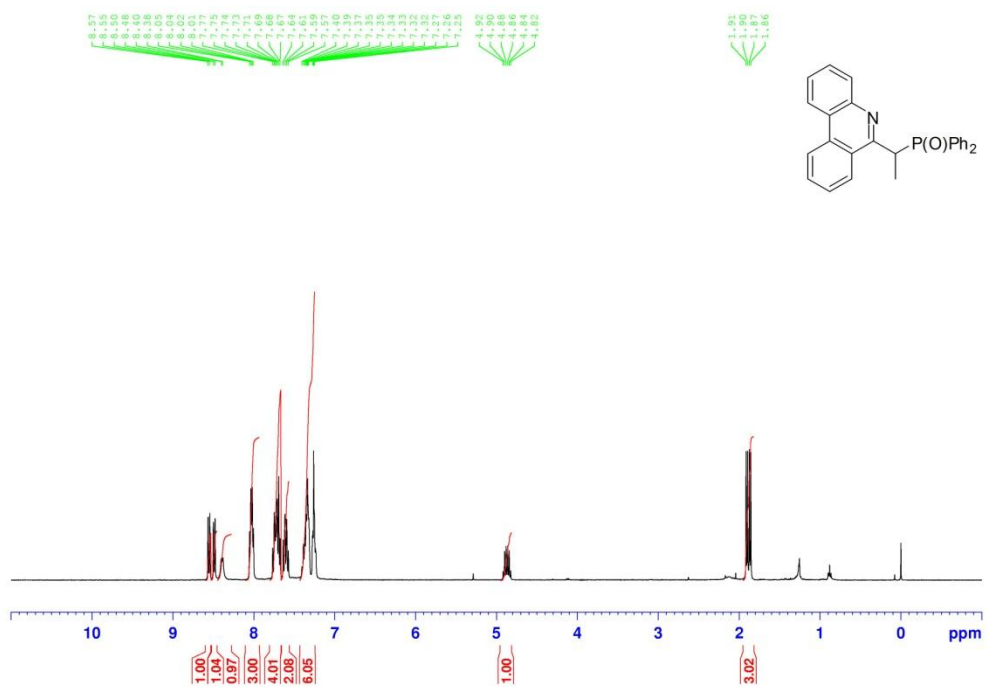

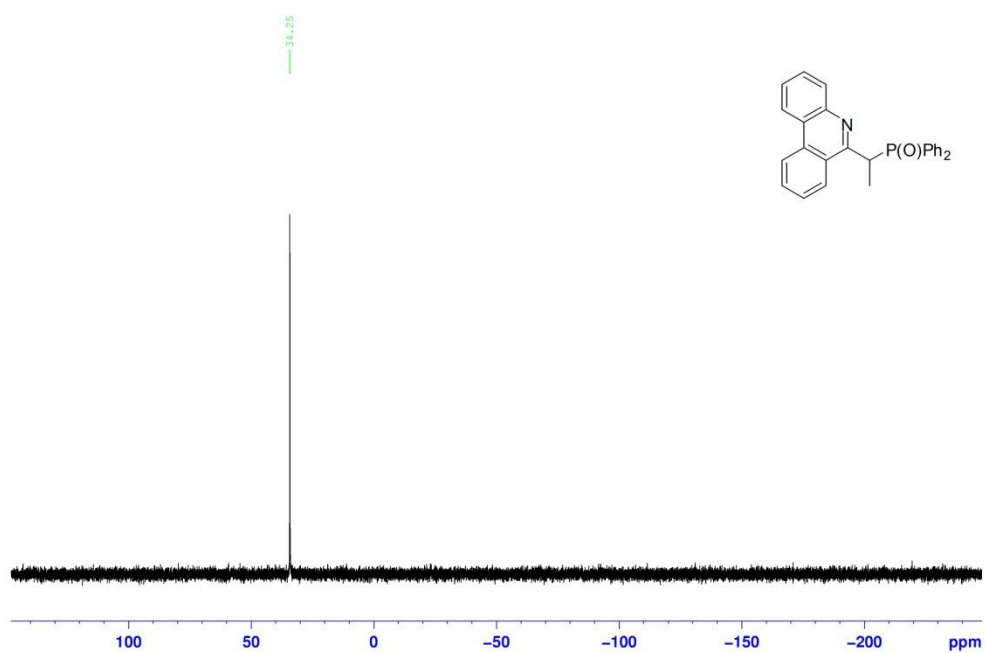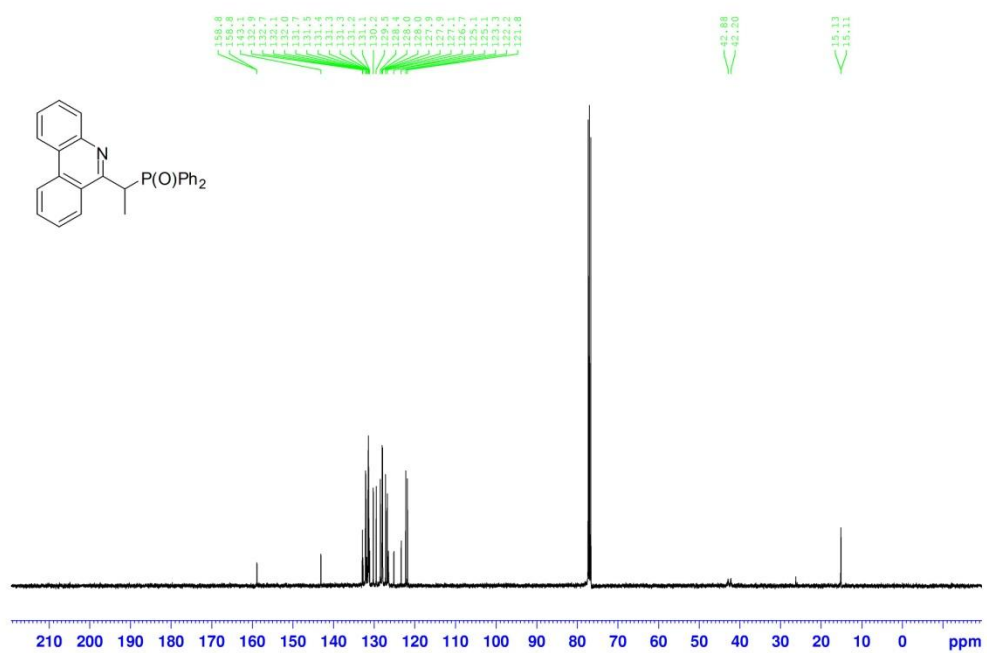

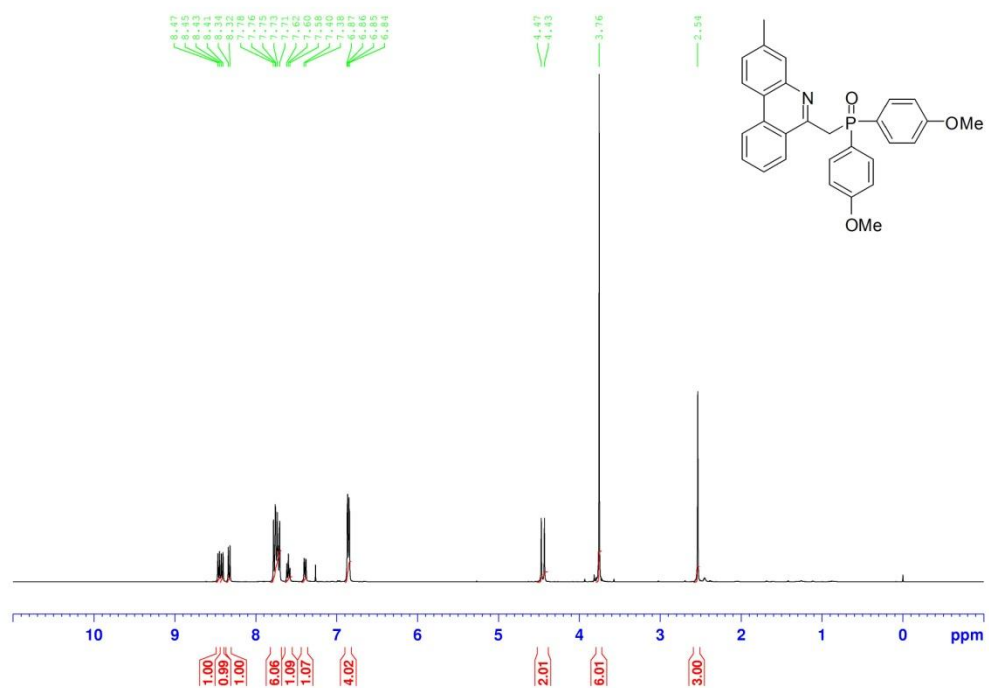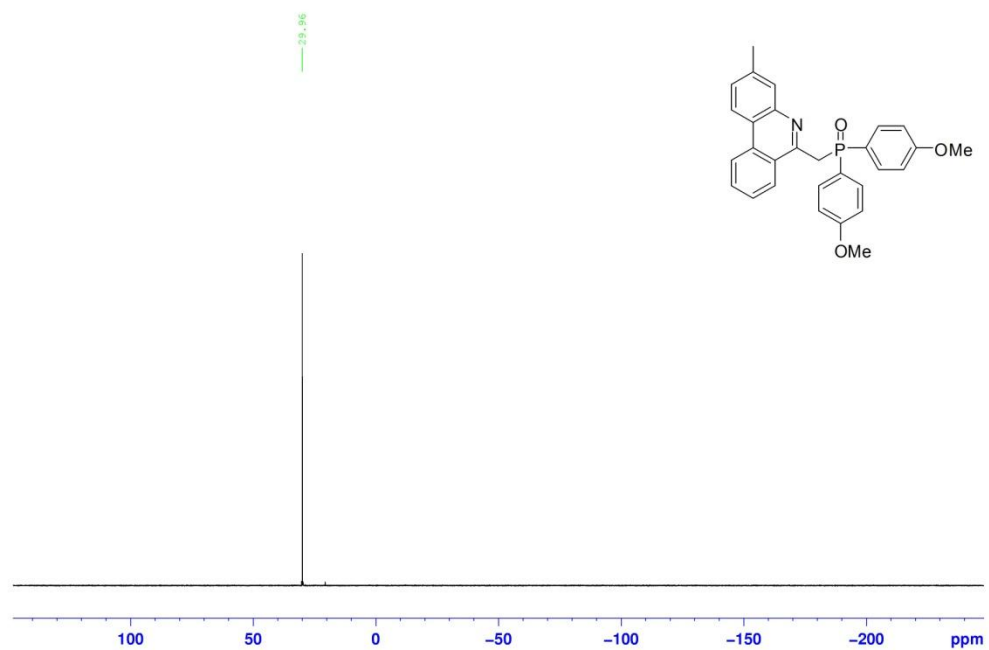

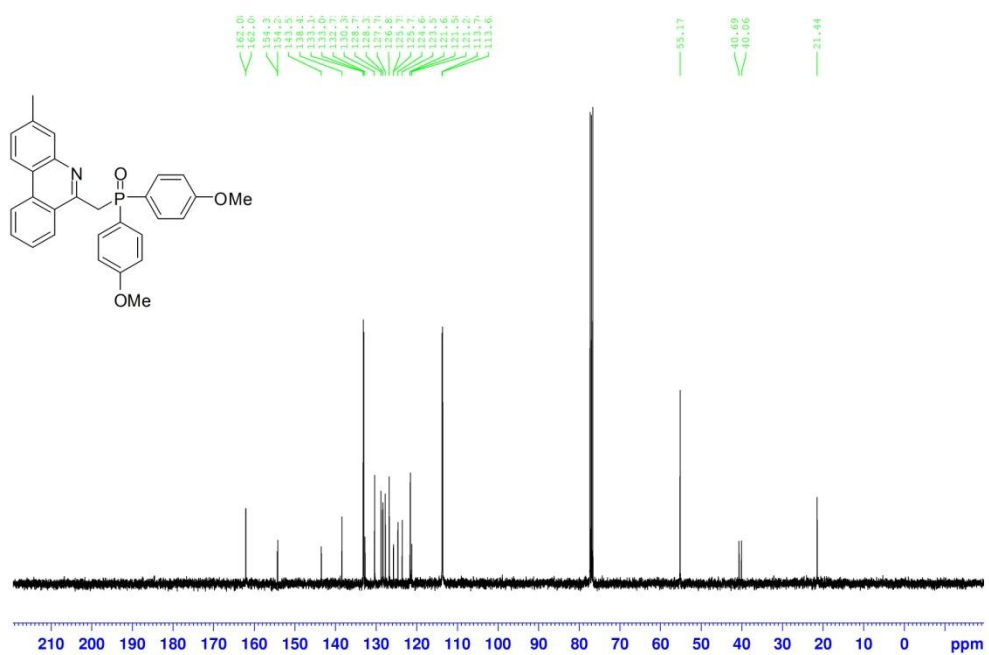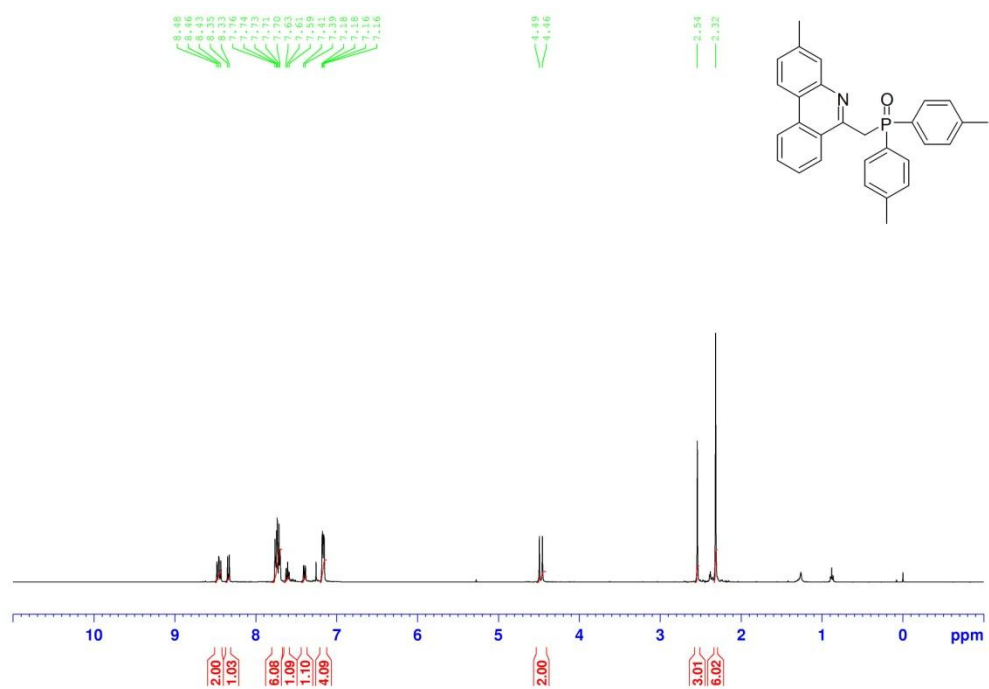

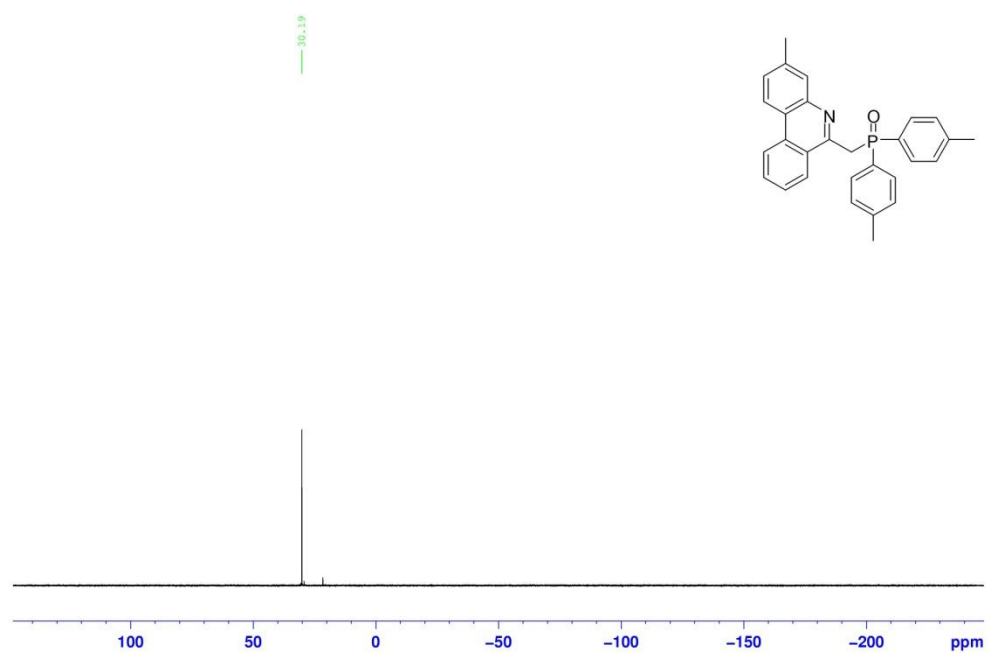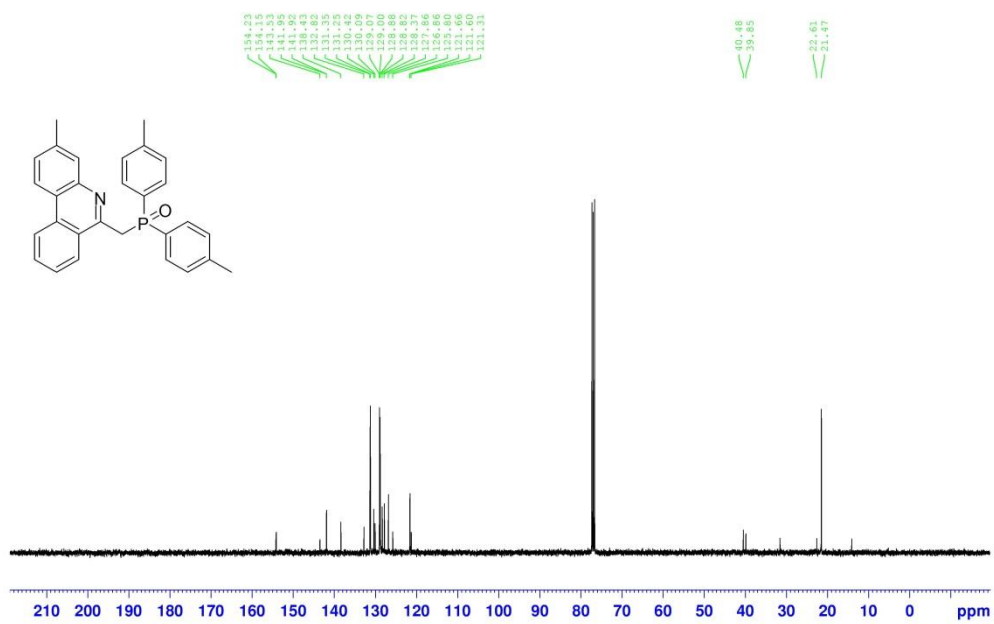

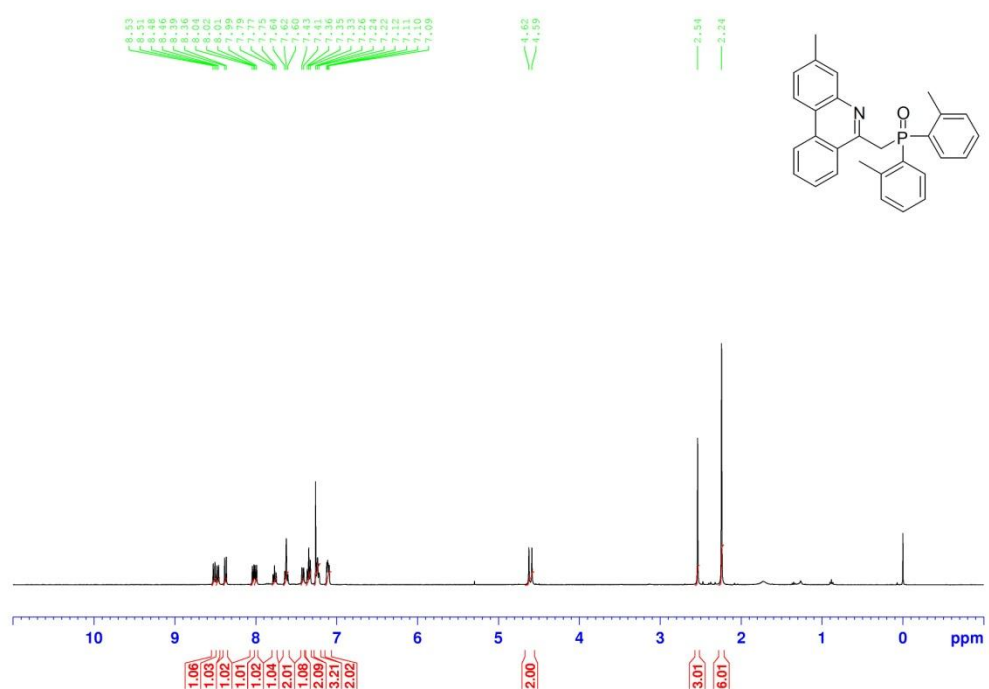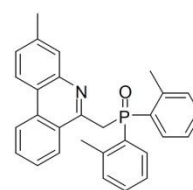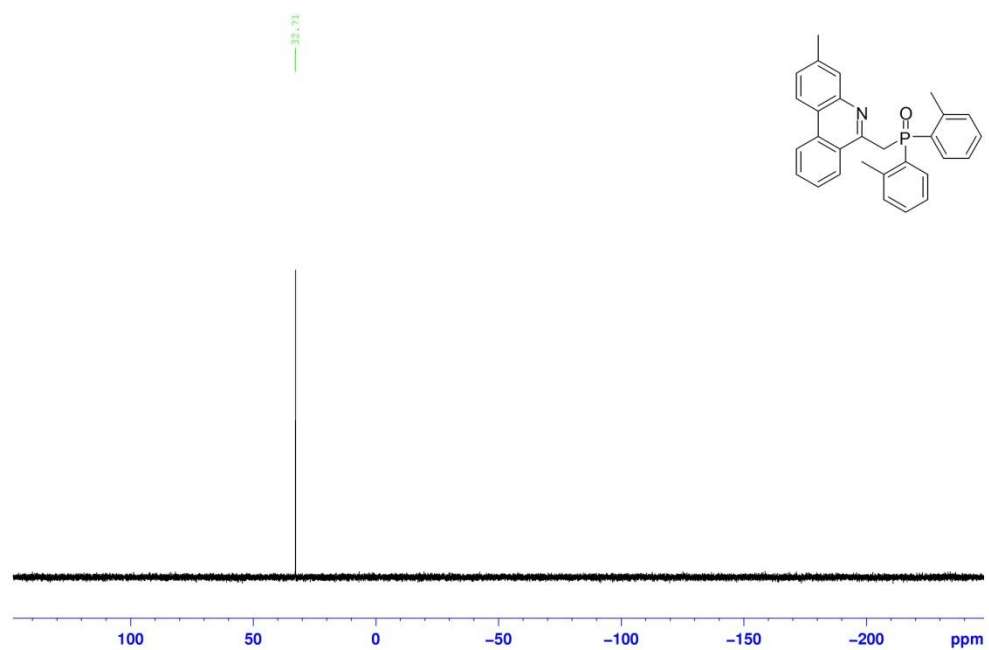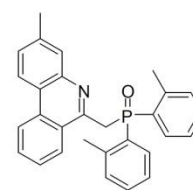

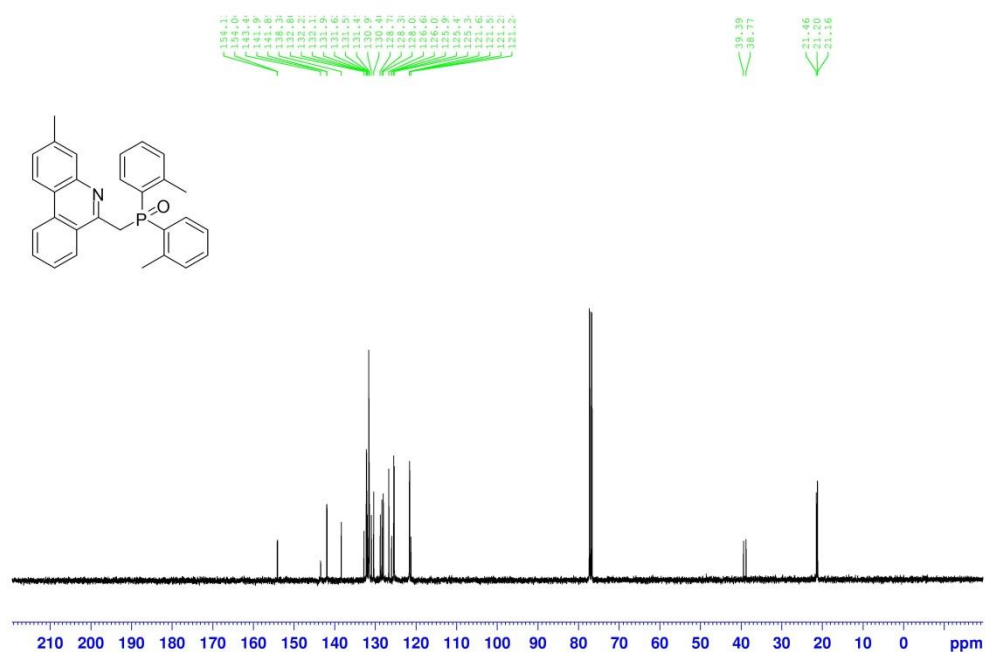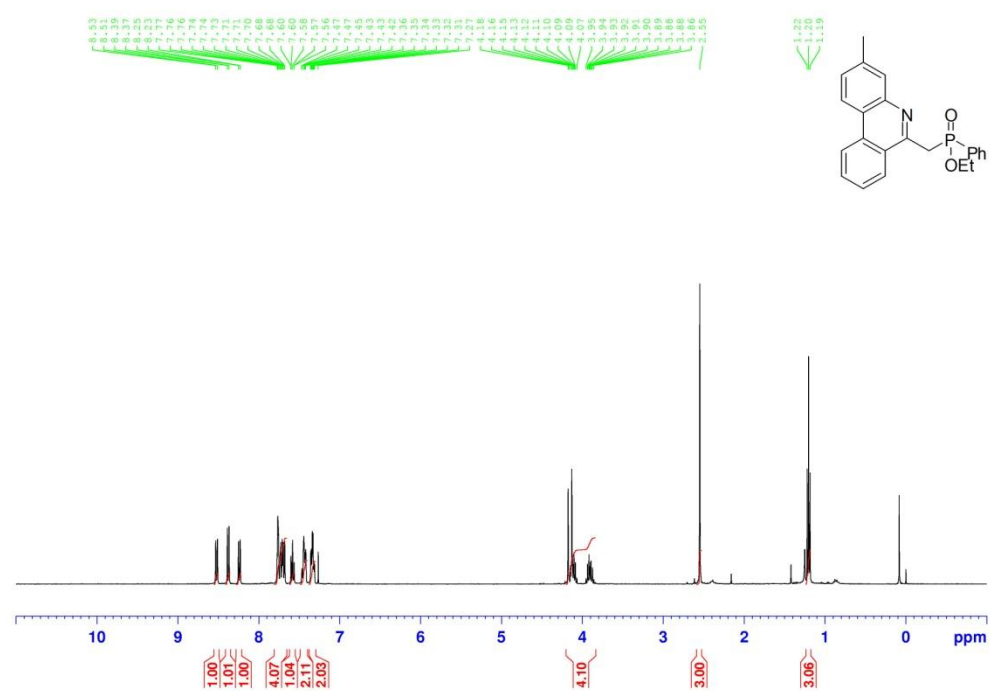



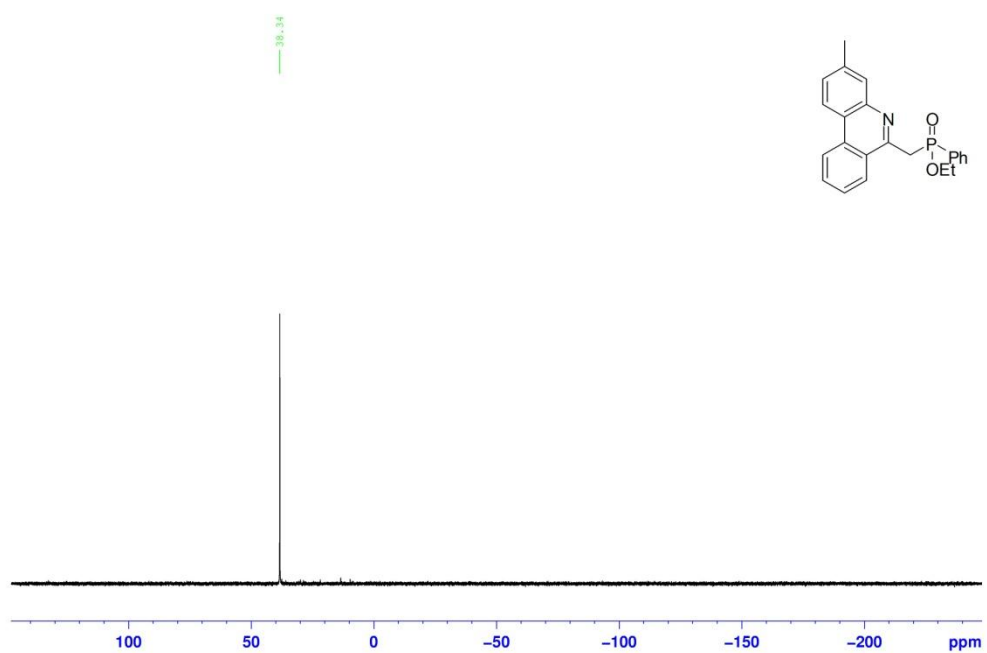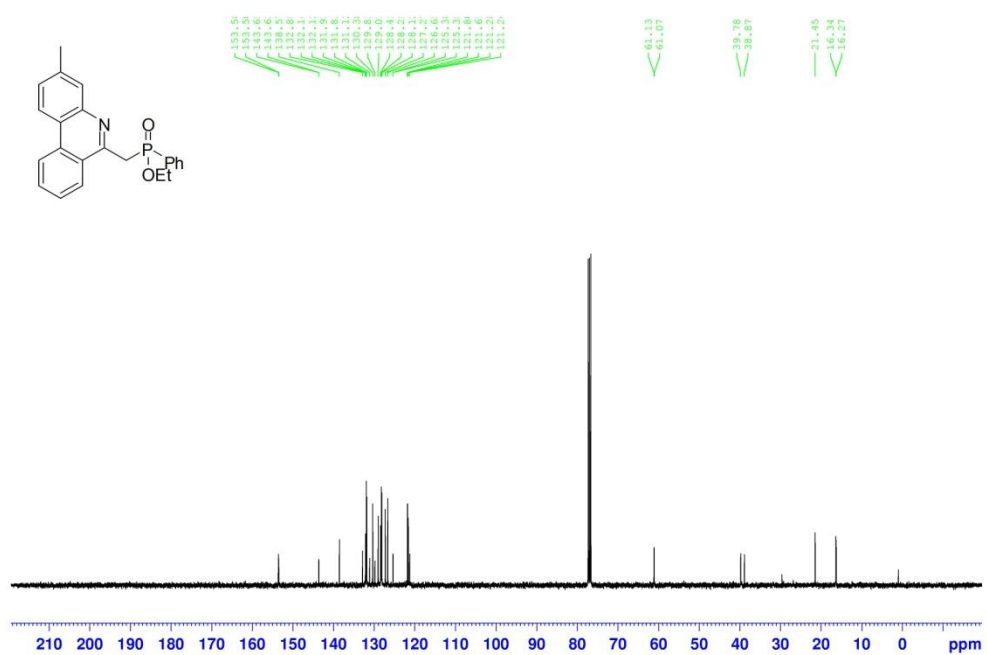



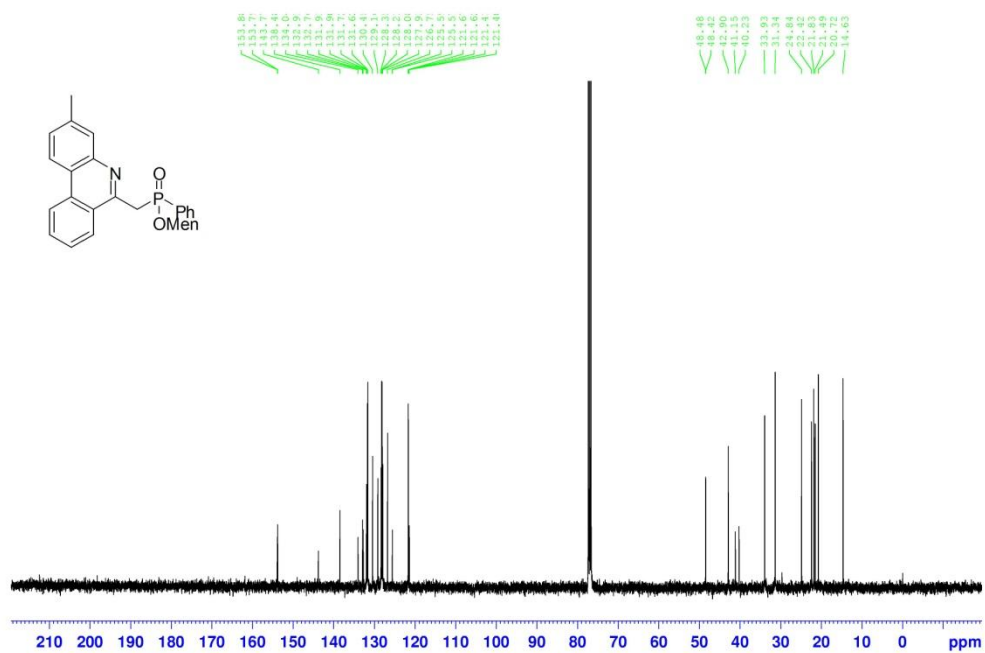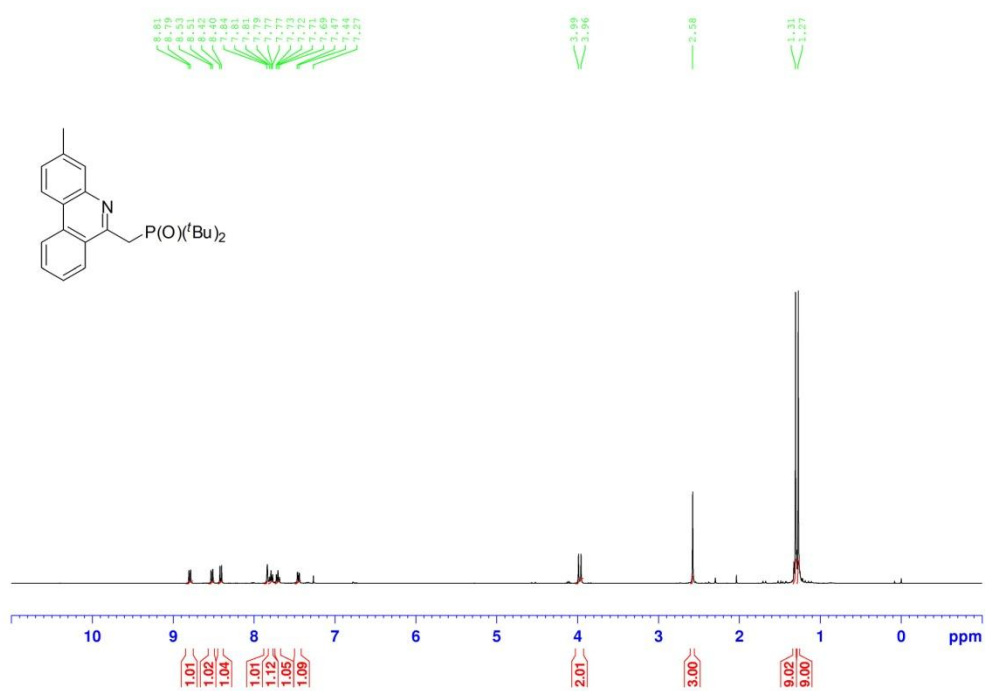

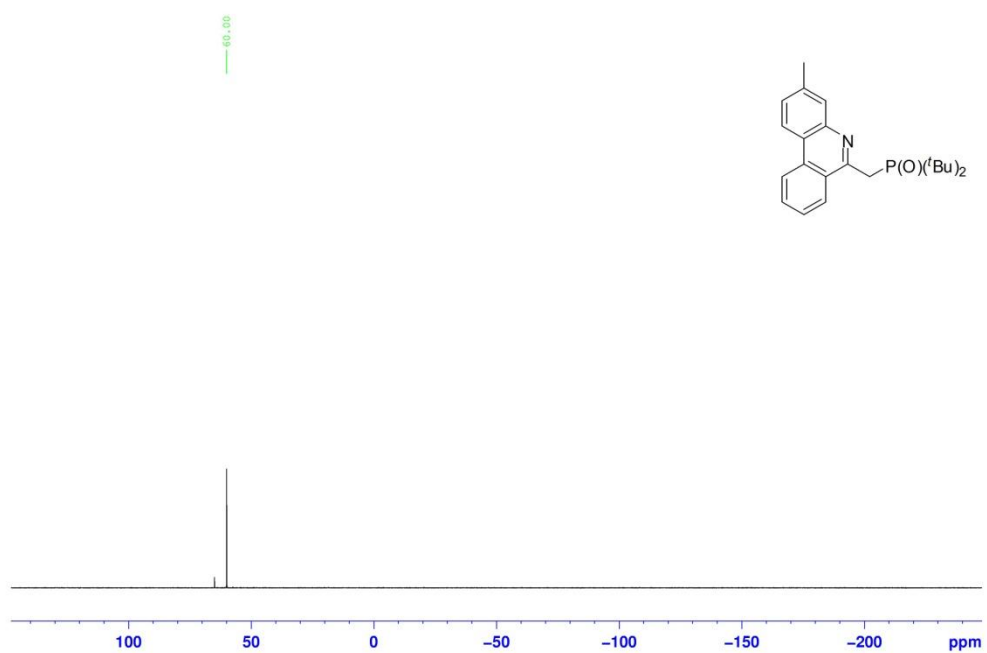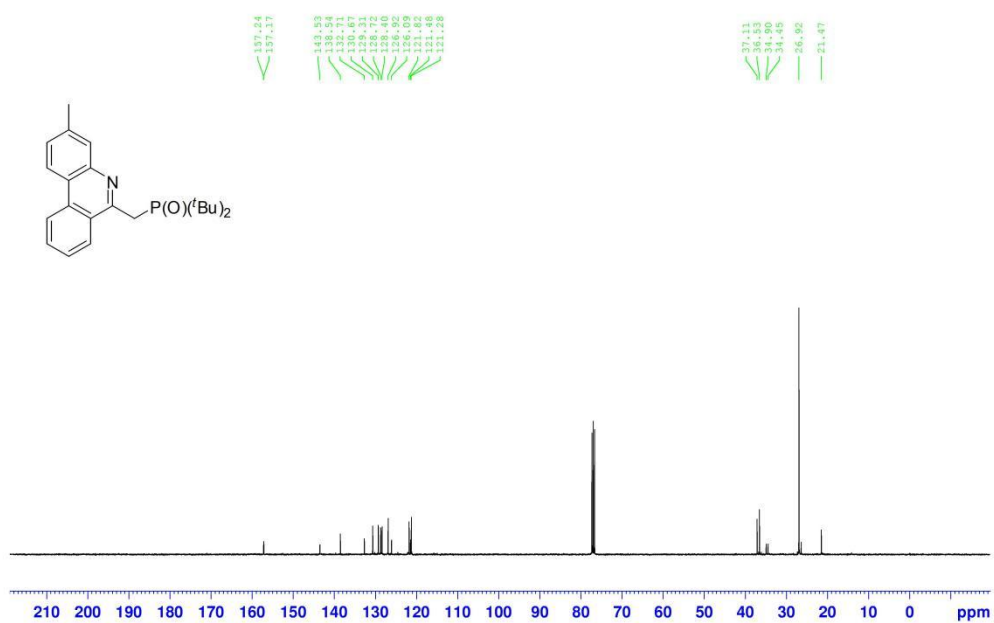



hurb-33

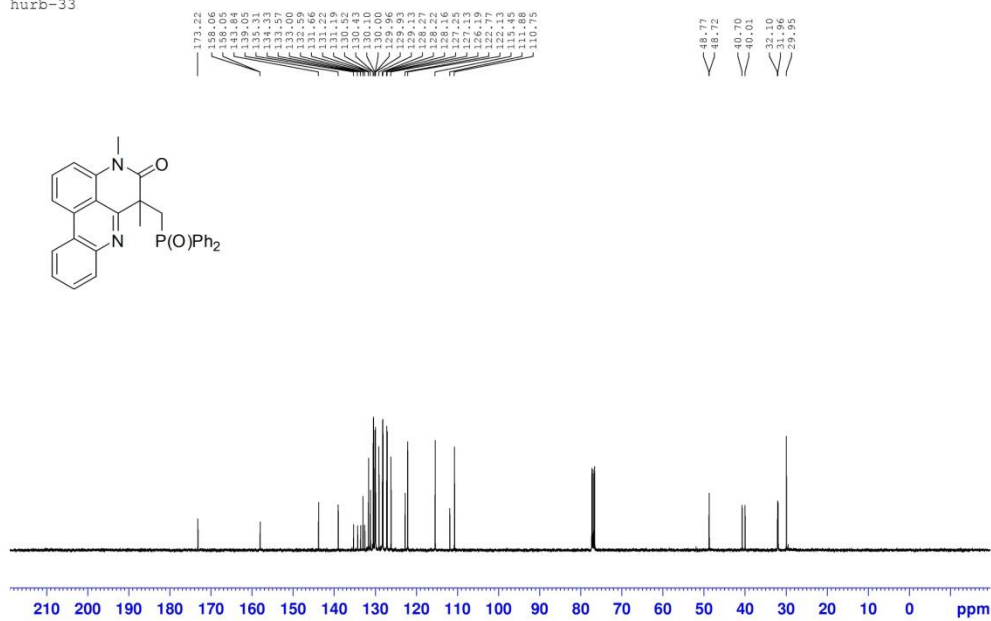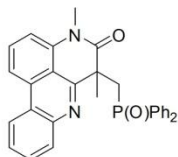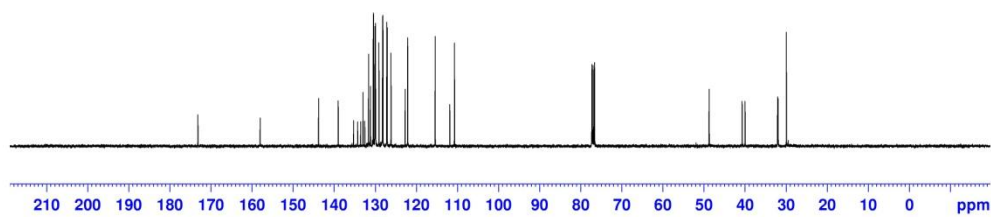

hurb-34

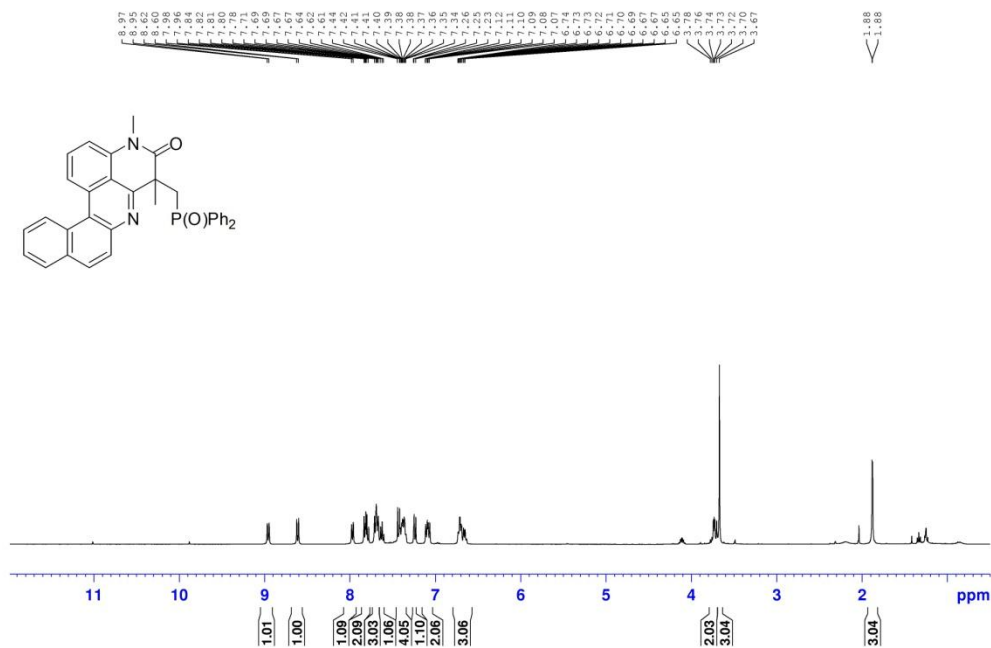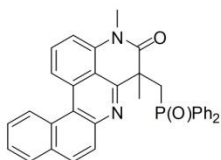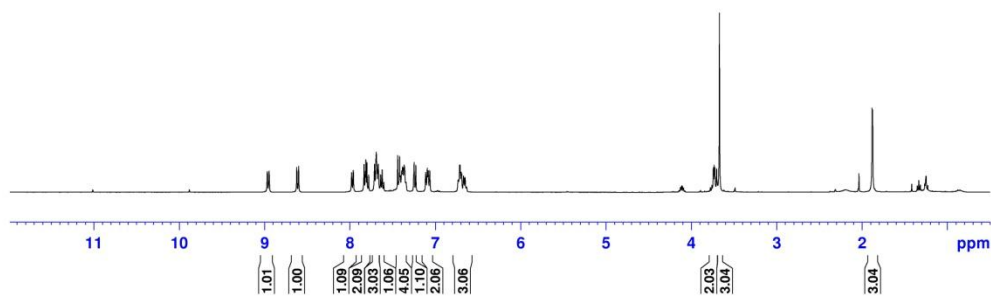

hurb-36

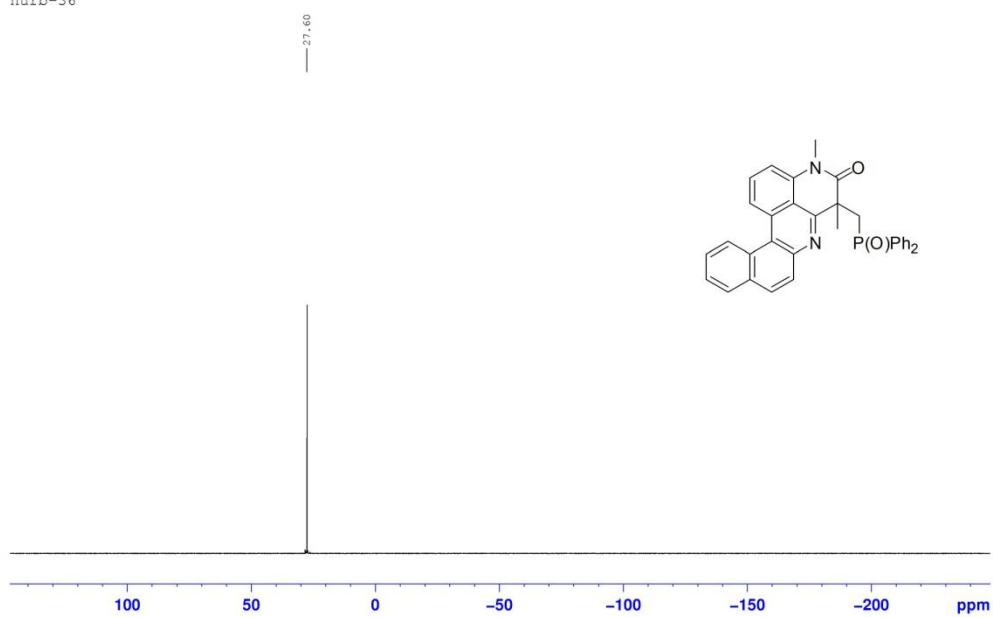

hurb-34

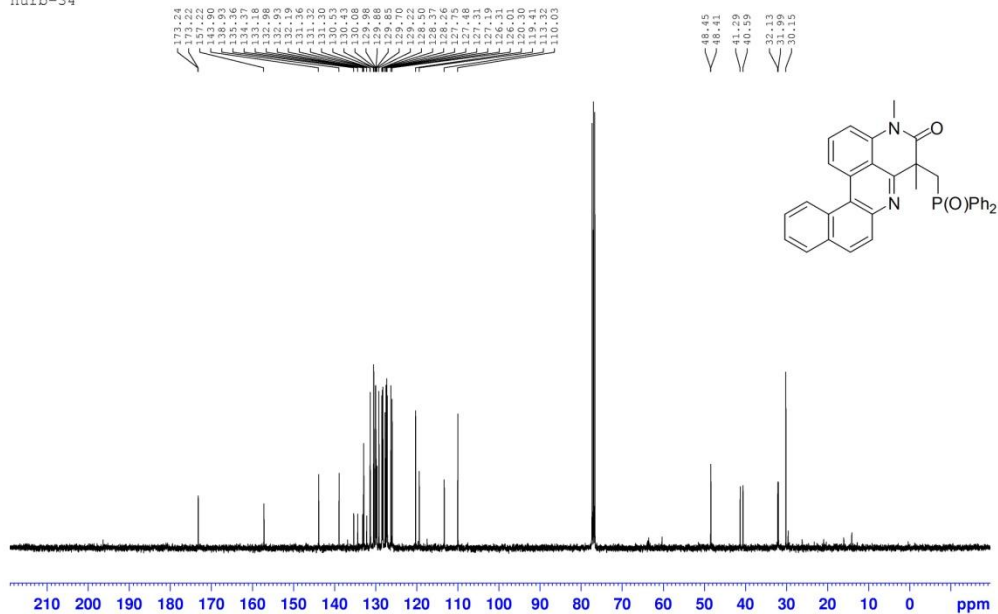





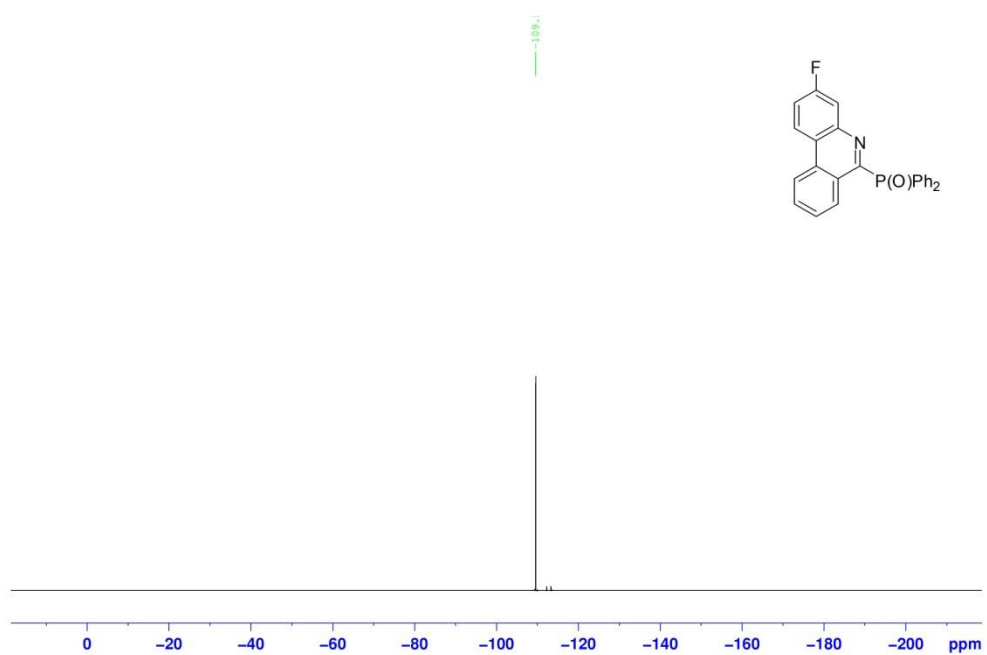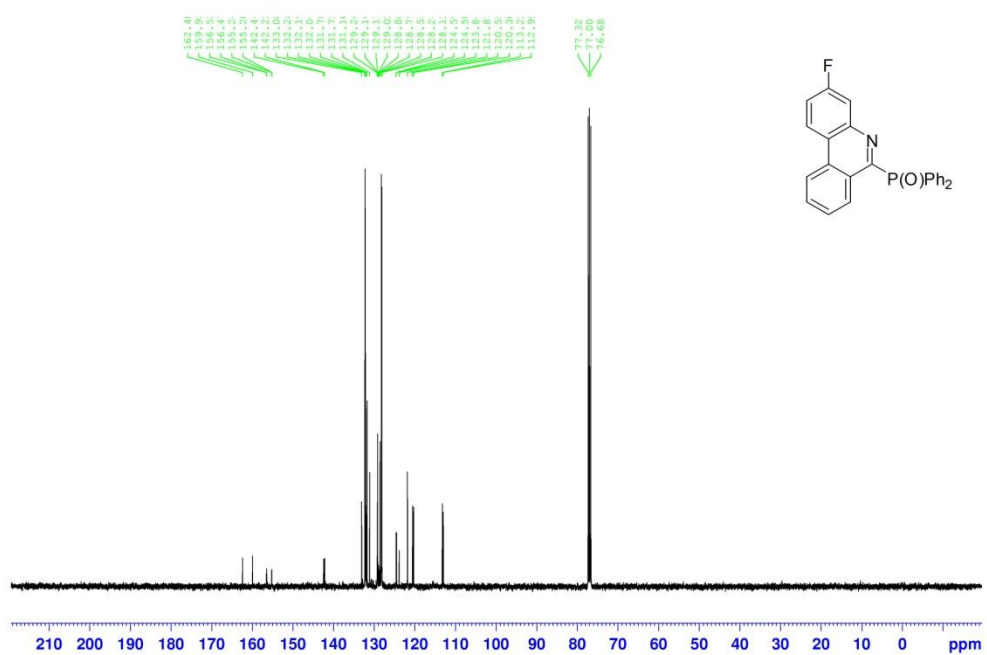

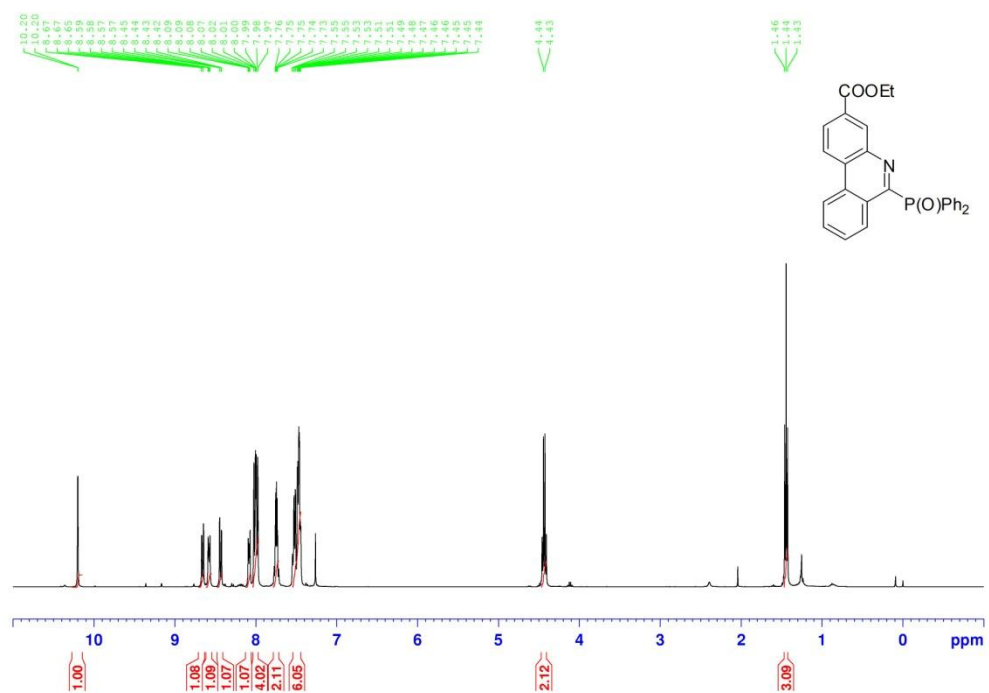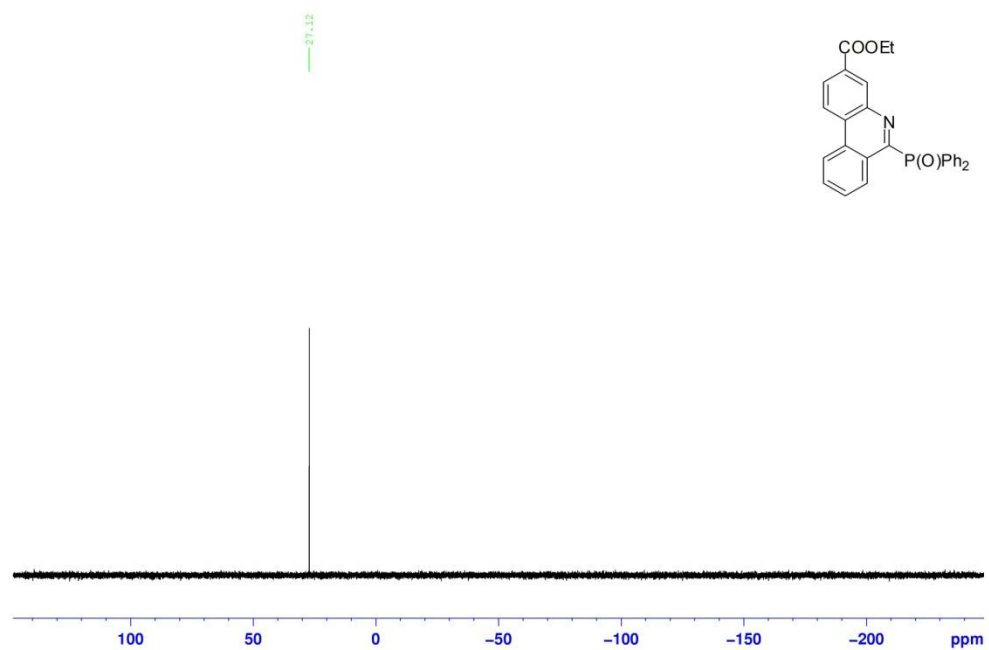

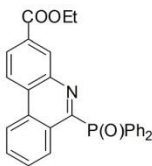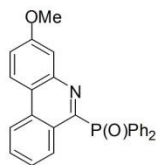

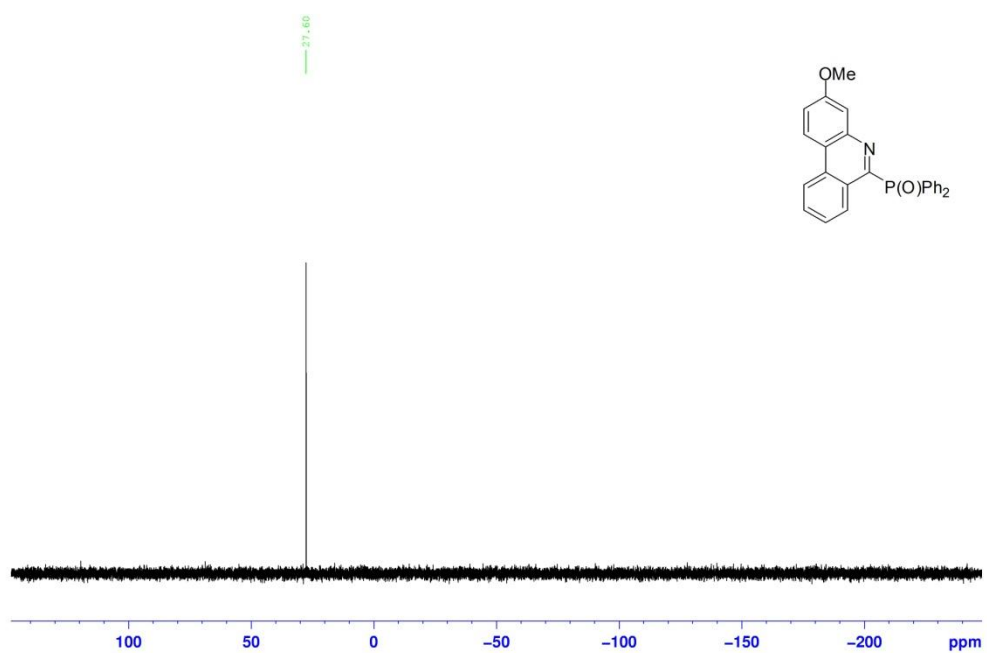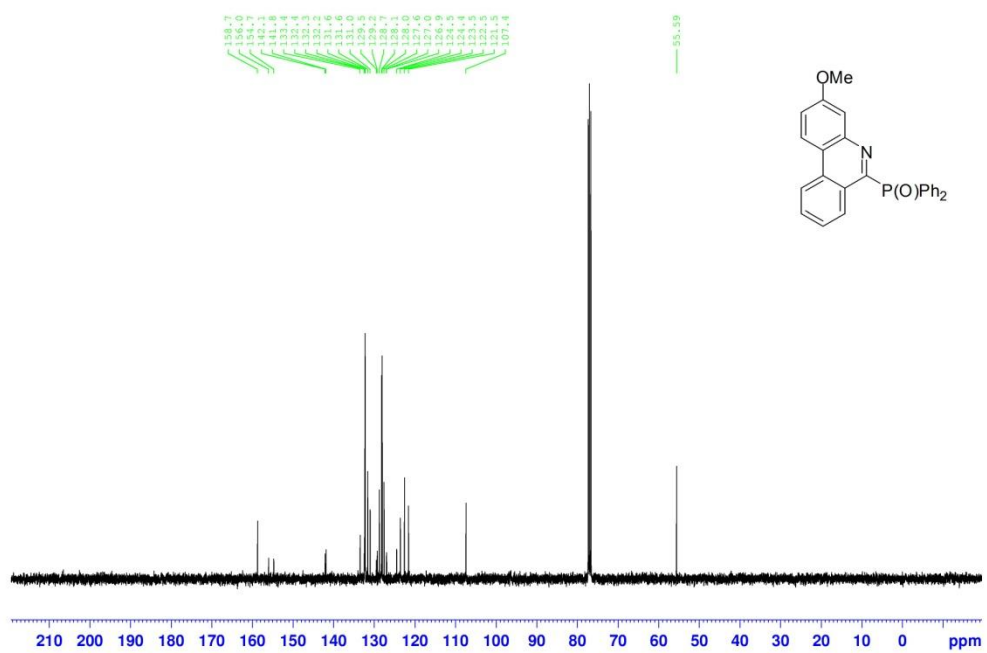

Supplement: c7qo01004d1.pdf [file c7qo01004d1.pdf]
